# Supplementary material for: 131 genetic loci highlight immunological pathways and tissues in nasal polyposis and asthma
Source: Research Square preprint supplement (doi:10.21203/rs.3.rs-5001302/v1), 2024-09-12
Supplement: Supplementary file 1 [file 6591e55d4ca9c4fd6eb3fa28.xlsx]

## Sheet: Supplementary Data 1
Band	CHR	POS	REF	ALT	BETA	SE	PVAL	DIRECTION	HetISq	HetChiSq	HetDf	HetPVal	rsid	Nearest gene	Consequence	OR	CI	FE
1p36.11	1	24875820	t	c	-0.0461	0.0074	4.001e-10	--	53.3	2.139	1	0.1436	rs3131526	RUNX3	regulatory region	0.954946	(0.941 - 0.969)	1.426
1p22.1	1	91706116	c	g	0.1193	0.0179	2.714e-11	++	76.3	4.227	1	0.03978	rs114425738	TGFBR3	intron	1.12671	(1.088 - 1.167)	3.116
1p13.2	1	113761186	a	c	0.0467	0.0083	1.852e-08	++	0	0.456	1	0.4994	rs6679677	RSBN1	upstream	1.04781	(1.03 - 1.065)	1.471
1q21.3	1	152313385	a	g	0.1596	0.0292	4.575e-08	++	60.4	2.525	1	0.1121	rs61816761	FLG	stop gain	1.17304	(1.108 - 1.242)	0.604
1q24.2	1	167445635	t	c	-0.0427	0.0061	3.52e-12	--	0	0.432	1	0.5109	rs840012	CD247	intron	0.958199	(0.946 - 0.97)	0.563
1q24.3	1	172776144	t	c	0.0398	0.0059	1.257e-11	++	63.1	2.712	1	0.0996	rs859722	FASLG	intron	1.0406	(1.028 - 1.053)	1.266
1q32.1	1	198776737	t	c	0.0549	0.0094	4.698e-09	++	0	0.066	1	0.7975	rs7538393	PTPRC	regulatory region	1.05643	(1.037 - 1.076)	0.706
1q32.1	1	203090600	t	c	-0.0377	0.0061	6.846e-10	--	0	0.184	1	0.6679	rs6664108	ADORA1	upstream	0.963002	(0.951 - 0.975)	1.029
2p25.1	2	8298563	t	c	-0.0417	0.0059	2.12e-12	--	75.3	4.051	1	0.04416	rs346835	ID2	intron	0.959157	(0.948 - 0.971)	1.119
2q12.1	2	102337753	a	g	-0.1222	0.008	3.695e-52	--	92	12.526	1	0.0004013	rs72823646	IL18R1, IL1RL1	intron	0.884971	(0.871 - 0.899)	1.256
2q12.1	2	103155940	t	c	-0.0699	0.0112	4.921e-10	--	0	0.661	1	0.4163	rs75895309	TMEM182	intron	0.932487	(0.912 - 0.954)	5.567
2q13	2	111117122	t	g	0.0952	0.009	4.176e-26	++	0	0.066	1	0.7968	rs72836344	ACOXL	intron	1.09988	(1.08 - 1.12)	0.971
2q37.3	2	241759225	a	g	-0.0842	0.0068	1.041e-35	--	64.8	2.838	1	0.09206	rs34290285	D2HGDH	intron	0.919247	(0.907 - 0.932)	0.835
3p25.3	3	10467515	c	g	-0.034	0.006	1.737e-08	--	0	0.031	1	0.8607	rs59105104	ATP2B2	intron	0.966572	(0.955 - 0.978)	0.932
3p25.2	3	12255041	a	g	0.0522	0.0081	1.281e-10	++	0	0.205	1	0.651	rs7641345	PPARG	downstream	1.05359	(1.037 - 1.071)	0.979
3p22.3	3	33006170	t	g	0.0457	0.0058	3.578e-15	++	55.4	2.24	1	0.1344	rs35570272	GLB1	intron	1.04676	(1.034 - 1.059)	0.855
3p21.31	3	50161104	a	g	0.033	0.0057	6.423e-09	++	0	0.351	1	0.5536	rs12631337	SEMA3F	intron	1.03355	(1.022 - 1.046)	1.131
3q21.3	3	128229306	t	c	-0.0424	0.0063	1.883e-11	--	46.6	1.873	1	0.1711	rs4857878	EEFSEC	intron	0.958486	(0.946 - 0.971)	0.987
3q28	3	188723373	t	c	0.0427	0.0065	4.022e-11	++	0	0.036	1	0.8488	rs9815874	LPP	intron	1.04362	(1.03 - 1.057)	0.636
3q29	3	193831619	t	c	-0.037	0.0058	1.307e-10	--	0	0.534	1	0.4651	rs1146045	OPA1	regulatory region	0.963676	(0.952 - 0.975)	0.922
3q29	3	196632439	a	g	-0.036	0.006	1.712e-09	--	31.3	1.455	1	0.2276	rs1684466	NRROS	non-coding exon	0.96464	(0.953 - 0.976)	0.969
4p14	4	38797027	a	c	-0.0505	0.0074	9.441e-12	--	0	0.754	1	0.3853	rs5743618	TLR1	missense variant	0.950754	(0.937 - 0.965)	0.463
4q24	4	105897896	a	g	0.0502	0.0064	4.625e-15	++	0	0.232	1	0.63	rs34712979	NPNT	splice region variant	1.05148	(1.038 - 1.065)	1.051
4q27	4	122307977	t	c	-0.0418	0.0061	6.009e-12	--	81.5	5.395	1	0.0202	rs7688384	KIAA1109	synonymous	0.959062	(0.947 - 0.971)	0.984
4q28.1	4	123755424	a	t	-0.0452	0.008	1.707e-08	--	0	0.024	1	0.8758	rs1364871	SPRY1	intron	0.955806	(0.941 - 0.971)	0.97
4q31.21	4	144513592	a	g	0.035	0.0057	7.644e-10	++	0	0.012	1	0.9142	rs1032297	HHIP	intron	1.03562	(1.024 - 1.048)	1.301
5p15.2	5	14610200	c	g	-0.0577	0.0092	3.123e-10	--	47.4	1.902	1	0.1679	rs16903574	FAM105A	missense variant	0.943933	(0.927 - 0.962)	1.761
5p13.2	5	35837132	a	g	-0.0466	0.0058	1.525e-15	--	0	0.171	1	0.679	rs12697352	IL7R	intergenic variant	0.954469	(0.943 - 0.966)	1.209
5q22.1	5	111066174	t	c	-0.1049	0.0066	1.383e-56	--	0	0.766	1	0.3816	rs1837253	TSLP	upstream	0.900415	(0.888 - 0.913)	1.037
5q23.1	5	119355086	c	g	-0.0356	0.0059	1.216e-09	--	34.8	1.534	1	0.2154	rs3813308	TNFAIP8	5' UTR	0.965026	(0.953 - 0.977)	0.715
5q31.1	5	132451445	a	g	-0.075	0.0059	1.261e-36	--	80.8	5.209	1	0.02247	rs6866614	C5orf56	intron	0.927743	(0.917 - 0.939)	1.176
5q31.1	5	134115992	a	c	0.0571	0.0091	2.935e-10	++	0	0.004	1	0.9477	rs5742913	TCF7	missense variant	1.05876	(1.04 - 1.078)	1.013
5q31.3	5	142171888	a	g	0.0489	0.0064	2.151e-14	++	0	0.231	1	0.6309	rs3899510	NDFIP	downstream	1.05012	(1.037 - 1.064)	0.891
5q32	5	148463317	a	c	-0.0434	0.0057	2.165e-14	--	0	0.032	1	0.8572	rs1964801	HTR4	intron	0.957528	(0.946 - 0.969)	0.897
6p22.3	6	22520826	t	c	0.0347	0.0062	2.391e-08	++	0	0.298	1	0.5852	rs6901920	HDGFL1	intergenic variant	1.03531	(1.022 - 1.048)	1.423
6p21.32	6	32647774	a	g	-0.1192	0.0057	7e-96	--	97	33.536	1	6.996e-09	rs17843580	HLA-DQA1	downstream	0.88763	(0.877 - 0.898)	0.921
6p21.31	6	35152114	a	g	-0.0614	0.0107	9.713e-09	--	10.7	1.12	1	0.29	rs72901705	TCP11	upstream	0.940447	(0.921 - 0.961)	0.392
6q12	6	63585217	a	g	-0.0351	0.0063	3.193e-08	--	69.8	3.315	1	0.06866	rs13213141	PTP4A1	downstream	0.965509	(0.953 - 0.978)	0.725
6q15	6	90296508	a	g	-0.0658	0.0063	1.494e-25	--	0	0.732	1	0.3922	rs1504215	BACH2	5' UTR	0.936318	(0.924 - 0.948)	0.706
6q24.2	6	143546269	t	c	0.0627	0.0111	1.586e-08	++	48.3	1.933	1	0.1645	rs12206238	PHACTR2	intron	1.06471	(1.041 - 1.089)	0.889
7p21.1	7	20401442	a	g	0.0404	0.0062	6.664e-11	++	40.8	1.69	1	0.1936	rs13242474	ITGB8	intron	1.04123	(1.028 - 1.054)	1.243
7p15.3	7	22727814	a	g	-0.0314	0.0056	2.612e-08	--	0	0.429	1	0.5127	rs2069832	IL6	intron	0.969088	(0.958 - 0.98)	0.81
8p23.1	8	9133569	t	c	-0.0498	0.0073	8.607e-12	--	0	0.833	1	0.3613	rs55858845	PPP1R3B	downstream	0.95142	(0.937 - 0.966)	0.86
8p23.1	8	10930102	t	c	0.0369	0.0057	7.897e-11	++	0	0.035	1	0.8515	rs4240673	XKR6	intron	1.03759	(1.026 - 1.05)	0.776
8q21.13	8	80374940	t	c	0.0534	0.006	3.652e-19	++	36.7	1.58	1	0.2088	rs13263709	ZBTB10	intron	1.05485	(1.042 - 1.068)	1.09
8q22.3	8	102119520	t	c	0.0337	0.006	1.696e-08	++	0	0.447	1	0.5036	rs646836	NCALD	intron	1.03427	(1.022 - 1.047)	0.911
9p24.1	9	6213148	a	g	0.1035	0.0064	1.693e-58	++	78	4.539	1	0.03313	rs928412	IL33	upstream	1.10905	(1.095 - 1.123)	1.033
9q34.11	9	129173188	t	c	0.0362	0.0061	3.664e-09	++	14.4	1.168	1	0.2799	rs4837346	IER5L	upstream	1.03686	(1.024 - 1.05)	1.06
10p15.1	10	6051176	t	c	-0.2187	0.0311	1.896e-12	--	19.7	1.246	1	0.2643	rs12722502	IL2RA	intron	0.803563	(0.756 - 0.854)	0.167
10p14	10	8062759	t	c	-0.0412	0.0057	5.584e-13	--	0	0.678	1	0.4102	rs3824660	GATA3	intron	0.959637	(0.949 - 0.971)	0.948
10p14	10	9011169	t	c	-0.0948	0.006	7.249e-57	--	90.5	10.579	1	0.001144	rs962993	GATA3	intergenic	0.909555	(0.898 - 0.921)	0.713
10p12.31	10	21504895	t	c	0.0383	0.0059	7.031e-11	++	0	0.299	1	0.5848	rs11012725	CASC10	intergenic	1.03904	(1.027 - 1.052)	0.999
11p15.5	11	1119542	a	g	-0.0426	0.0059	7.569e-13	--	51.7	2.069	1	0.1503	rs11245965	MUC5AC	intergenic	0.958295	(0.947 - 0.97)	0.904
11q12.2	11	61830816	t	c	-0.0435	0.0066	4.93e-11	--	67.8	3.11	1	0.0778	rs174572	FADS2	intron	0.957433	(0.945 - 0.97)	0.902
11q13.1	11	65784486	a	g	-0.0402	0.0057	1.599e-12	--	0	0.076	1	0.7824	rs479844	OVOL1	upstream	0.960597	(0.949 - 0.972)	1.066
11q13.5	11	76582682	t	g	0.0633	0.0056	3.301e-29	++	88.3	8.524	1	0.003505	rs7936312	EMSY	intergenic	1.06535	(1.053 - 1.078)	0.857
11q24.3	11	128261371	a	g	-0.0429	0.0067	1.886e-10	--	75.5	4.074	1	0.04354	rs1940377	ETS1	intergenic	0.958007	(0.945 - 0.971)	1.124
12q13.11	12	47814585	t	c	0.0364	0.0056	1.142e-10	++	74	3.842	1	0.05	rs11168249	HDAC7	intron	1.03707	(1.025 - 1.049)	1.115
12q13.3	12	57109992	t	c	0.0471	0.0057	1.28e-16	++	88.1	8.409	1	0.003733	rs167769	STAT6	5' UTR	1.04823	(1.036 - 1.06)	1.104
12q21.1	12	71191963	t	c	0.0354	0.006	3.191e-09	++	0	0.982	1	0.3217	rs17226898	TSPAN8	intron	1.03603	(1.023 - 1.049)	0.799
12q22	12	94169099	c	g	-0.0504	0.0087	5.771e-09	--	0	0.899	1	0.3431	rs2361359	PLXNC1	intron	0.950849	(0.934 - 0.968)	1.031
12q24.31	12	123428886	a	g	0.0406	0.007	5.349e-09	++	24.2	1.319	1	0.2508	rs4930718	RILPL2	intron	1.04144	(1.027 - 1.056)	0.984
13q14.11	13	39794307	a	g	0.0425	0.0059	7.796e-13	++	19.5	1.242	1	0.2652	rs11618582	COG6	downstream	1.04342	(1.031 - 1.056)	0.978
13q32.3	13	99352087	t	c	-0.0481	0.0059	2.131e-16	--	51.6	2.064	1	0.1508	rs1923897	UBAC2	intron	0.953038	(0.942 - 0.965)	0.903
14q24.1	14	68287700	t	c	0.0383	0.0061	3.527e-10	++	0	0.877	1	0.3491	rs2104047	RAD51B	intron	1.03904	(1.026 - 1.052)	0.98
14q32.12	14	92663465	t	c	-0.0358	0.006	1.919e-09	--	0	0.938	1	0.3327	rs9323880	RIN3	intron	0.964833	(0.953 - 0.977)	0.898
15q15.1	15	41490530	a	c	0.0394	0.0064	5.495e-10	++	75.9	4.142	1	0.04182	rs12440067	ITPKA	upstream	1.04019	(1.027 - 1.054)	1.186
15q22.2	15	60776148	a	g	-0.0765	0.0082	1.187e-20	--	53.8	2.166	1	0.141	rs10519067	RORA	intron	0.926353	(0.911 - 0.942)	1.227
15q22.33	15	67150258	t	c	0.0916	0.0064	5.226e-47	++	46.7	1.875	1	0.1709	rs17293632	SMAD3	intron	1.09593	(1.082 - 1.11)	1.155
15q25.3	15	85702038	a	g	-0.0339	0.0062	4.345e-08	--	0	0.847	1	0.3574	rs12916001	AKAP13	intron	0.966668	(0.955 - 0.979)	0.768
16p13.13	16	11125184	a	g	-0.0684	0.0068	1.001e-23	--	55.9	2.266	1	0.1323	rs12935657	CLEC16A	intron	0.933887	(0.921 - 0.947)	0.908
16p12.1	16	27337847	t	c	0.0645	0.0062	3.522e-25	++	0	0.286	1	0.5927	rs3785356	IL4R	intron	1.06663	(1.053 - 1.08)	0.85
16q24.3	16	89649814	t	g	-0.0372	0.0067	2.648e-08	--	0	0.452	1	0.5015	rs4785699	CHMP1A	intron	0.963483	(0.95 - 0.977)	1.057
17p13.3	17	1580323	t	c	-0.0341	0.0061	2.853e-08	--	0	0.108	1	0.7425	rs7222858	SLC43A2	intron	0.966475	(0.955 - 0.979)	0.918
17p12	17	16025689	a	c	0.0317	0.0056	1.727e-08	++	2.3	1.023	1	0.3118	rs62073587	TTC19	intron	1.03221	(1.02 - 1.044)	1.09
17q21.1	17	39924659	a	g	0.0679	0.0056	1.573e-33	++	0	0.88	1	0.3481	rs8076131	ORMDL3	intron	1.07026	(1.058 - 1.083)	0.887
17q21.2	17	42294404	a	c	-0.0418	0.0064	7.518e-11	--	0	0.213	1	0.6448	rs16967637	STAT5A	intron	0.959062	(0.947 - 0.972)	0.784
17q21.31	17	45259320	c	g	-0.0355	0.006	3.707e-09	--	28.2	1.393	1	0.2379	rs4247364	SPATA32	intron	0.965123	(0.953 - 0.977)	0.96
17q21.33	17	49370984	a	g	0.0612	0.0057	8.692e-27	++	0	0.018	1	0.8928	rs12952581	ZNF651	intron	1.06311	(1.051 - 1.075)	1.182
17q25.1	17	75800536	a	c	-0.0558	0.009	6.321e-10	--	0	0.063	1	0.8016	rs112503011	UNK	intron	0.945728	(0.929 - 0.963)	0.542
18q21.33	18	63181406	t	c	0.0345	0.0062	2.024e-08	++	0	0.039	1	0.844	rs4940576	BCL2	intron	1.0351	(1.022 - 1.048)	0.833
19q13.11	19	33235672	a	c	-0.0985	0.0105	4.977e-21	--	0	0.055	1	0.8139	rs117710327	SLC7A10	TF binding site	0.906196	(0.887 - 0.925)	1.483
19q13.32	19	45816157	c	g	-0.0348	0.0063	3.787e-08	--	20.5	1.258	1	0.2621	rs1132645	SYMPK	synonymous	0.965799	(0.954 - 0.978)	1.014
20q11.21	20	32276789	a	g	0.0447	0.0076	4.735e-09	++	0	0.202	1	0.6531	rs6119231	KIF3B	upstream	1.04571	(1.03 - 1.062)	0.884
20q13.33	20	63706054	a	g	-0.034	0.0062	4.067e-08	--	0	0.02	1	0.8875	rs6011040	ARFRP1	intron	0.966572	(0.954 - 0.979)	1.07
21q22.12	21	35051694	t	c	0.0562	0.008	1.834e-12	++	87.5	8.021	1	0.004624	rs17227210	RUNX1	intron	1.05781	(1.041 - 1.075)	1.022
22q12.3	22	37137755	c	g	-0.0362	0.0056	1.453e-10	--	0	0.047	1	0.8289	rs228958	IL2RB	intron	0.964447	(0.953 - 0.976)	1.255
22q13.31	22	46597553	a	g	0.0354	0.0061	6.256e-09	++	0	0.06	1	0.8072	rs4823863	GRAMD4	intron	1.03603	(1.023 - 1.049)	1.365

## Sheet: Supplementary Data 2
Band	CHR	POS	REF	ALT	BETA	SE	PVAL	DIRECTION	HetISq	HetChiSq	HetDf	HetPVal	rsid	Nearest gene	Consequence	OR	CI	FE
1q21.3	1	150979381	a	g	0.1155	0.0146	2.402e-15	++	49.1	1.965	1	0.1609	rs3754211	ANXA9	upstream	1.12243	(1.09 - 1.155)	0.977
1q24.2	1	167452714	t	c	-0.0954	0.0161	3.192e-09	--	0	0.944	1	0.3314	rs1773561	CD247	intron	0.909009	(0.88 - 0.939)	0.578
1q32.1	1	198738388	t	g	0.2165	0.0352	7.8e-10	++	0	0.835	1	0.3607	rs113752715	PTPRC	intron	1.24172	(1.159 - 1.33)	0.393
2p23.3	2	24633890	a	g	-0.1031	0.016	1.184e-10	--	0	0.19	1	0.663	rs11894248	NCOA1	intron	0.902037	(0.874 - 0.931)	1.2
2q12.1	2	102309330	c	g	0.1728	0.0156	1.877e-28	++	0	0.35	1	0.554	rs4851564	IL1RL1	upstream	1.18863	(1.153 - 1.226)	0.962
2q13	2	111119036	c	g	0.1651	0.025	4.196e-11	++	0	0.052	1	0.8198	rs72836346	BCL2L11	intron	1.17951	(1.123 - 1.239)	1.126
2q22.3	2	145790450	t	c	0.179	0.0267	2.036e-11	++	73	3.701	1	0.05439	rs10427396	ZEB2	intergenic	1.19602	(1.135 - 1.26)	1.062
2q37.1	2	232727791	a	g	-0.1217	0.0146	6.58e-17	--	93	14.373	1	0.0001499	rs6704768	GIGYF2	intron	0.885414	(0.86 - 0.911)	0.899
2q37.3	2	241768630	t	c	-0.1676	0.0278	1.581e-09	--	0	0.021	1	0.8843	rs113372064	D2HGDH	3' UTR	0.845692	(0.801 - 0.893)	0.758
3p22.3	3	33002847	t	c	-0.081	0.0146	3.241e-08	--	0	0.008	1	0.9301	rs9828592	GLB1	intron	0.922194	(0.896 - 0.949)	0.898
3p13	3	71497593	t	c	0.1579	0.0162	2.18e-22	++	78.4	4.627	1	0.03147	rs6789751	FOXP1	intron	1.17105	(1.134 - 1.209)	0.891
5p13.2	5	35841347	a	g	0.102	0.0152	2.064e-11	++	0	0.009	1	0.9257	rs10075764	IL7R	regulatory region	1.10738	(1.075 - 1.141)	1.209
5q22.1	5	111128310	t	c	-0.2003	0.0152	7.05e-40	--	21.7	1.277	1	0.2585	rs1043828	WDR36	3' UTR	0.818485	(0.794 - 0.844)	0.854
5q31.1	5	131381397	t	c	-0.1479	0.0163	1.103e-19	--	37.3	1.596	1	0.2065	rs11738827	CDC42SES	intron	0.862517	(0.835 - 0.891)	0.7
5q31.1	5	132451445	a	g	-0.1697	0.0156	1.779e-27	--	0	0.252	1	0.6155	rs6866614	C5orf56	intron	0.843918	(0.818 - 0.87)	1.176
5q31.3	5	142088689	t	c	0.0838	0.0147	1.142e-08	++	0	0.932	1	0.3344	rs1821263	NDFIP1	intergenic	1.08741	(1.056 - 1.12)	1.029
6p25.3	6	410417	a	g	-0.1073	0.0146	2.012e-13	--	58.3	2.399	1	0.1214	rs1050979	IRF4	3' UTR	0.898256	(0.873 - 0.925)	0.949
6p21.32	6	32666578	a	g	0.2554	0.0165	3.855e-54	++	0	0.012	1	0.9128	rs1049072	HLA-DQB1	synonymous	1.29098	(1.25 - 1.334)	1.621
6q15	6	90246276	a	g	0.1418	0.0165	1.022e-17	++	76.2	4.209	1	0.04022	rs62408224	BACH2	intron	1.15235	(1.115 - 1.191)	0.732
7p15.1	7	28123055	t	c	-0.0837	0.0146	9.637e-09	--	12	1.136	1	0.2864	rs12531540	JAZF1	intron	0.919707	(0.893 - 0.947)	0.987
8q24.12	8	118997146	a	c	-0.1056	0.0146	4.846e-13	--	0	0.535	1	0.4646	rs4618726	COLEC10	intron	0.899784	(0.874 - 0.926)	1.007
8q24.3	8	141408317	t	c	0.179	0.0327	4.423e-08	++	20.5	1.258	1	0.262	rs116877855	PTP4A3	intron	1.19602	(1.122 - 1.275)	1.052
9p24.1	9	6192796	t	c	0.316	0.0159	9.995e-88	++	51.7	2.072	1	0.15	rs2095044	IL33	upstream	1.37163	(1.329 - 1.415)	1.025
9q22.33	9	99357187	a	g	-0.1051	0.0177	2.65e-09	--	75.1	4.011	1	0.0452	rs7044307	SEC61B	intron	0.900234	(0.869 - 0.932)	1.808
10p15.1	10	6029490	t	c	-0.0999	0.0158	2.713e-10	--	31.3	1.457	1	0.2275	rs4749920	IL2RA	intron	0.904928	(0.877 - 0.934)	1.45
10p14	10	8063782	a	g	-0.1402	0.0147	1.384e-21	--	0	0.019	1	0.8894	rs2277228	GATA3	intron	0.869184	(0.844 - 0.895)	0.96
10p14	10	9015459	t	g	-0.1996	0.0158	1.032e-36	--	0	0.159	1	0.6905	rs1031163	GATA3	intergenic	0.819058	(0.794 - 0.845)	0.711
10q21.2	10	62649027	t	c	-0.1089	0.0154	1.471e-12	--	0	0.516	1	0.4724	rs10995258	ZNF365	intron	0.89682	(0.87 - 0.925)	0.963
11q12.2	11	61824890	a	g	0.1013	0.0151	1.857e-11	++	0	0.541	1	0.462	rs174566	FADS1,FADS2	intron	1.10661	(1.074 - 1.14)	1.283
11q13.3	11	70148953	a	g	-0.0904	0.0147	7.555e-10	--	0	0.595	1	0.4406	rs12279397	ANO1	intron	0.913566	(0.887 - 0.941)	0.853
11q23.3	11	118872577	a	g	0.1167	0.0193	1.513e-09	++	0	0.015	1	0.9025	rs12365699	CXCR5	intergenic	1.12378	(1.082 - 1.167)	0.874
12q13.11	12	47814585	t	c	0.0825	0.0147	1.816e-08	++	60	2.498	1	0.114	rs11168249	HDAC7	intron	1.086	(1.055 - 1.118)	1.115
12q13.2	12	55976127	a	g	-0.1294	0.0155	6.691e-17	--	0.7	1.007	1	0.3156	rs773108	RAB5B	intron	0.878622	(0.852 - 0.906)	0.932
13q14.11	13	39794464	t	c	-0.1052	0.0155	1.172e-11	--	0	0.467	1	0.4945	rs9594366	COG6	downstream	0.900144	(0.873 - 0.928)	0.977
13q14.11	13	42414788	a	g	0.1072	0.015	9.006e-13	++	0	0.159	1	0.69	rs7327510	AKAP11	intron	1.11316	(1.081 - 1.147)	0.827
13q32.3	13	99202870	a	g	0.0878	0.0148	3.262e-09	++	11.1	1.124	1	0.289	rs2182885	UBAC2	intron	1.09177	(1.06 - 1.124)	0.88
14q23.3	14	64456448	t	g	0.0856	0.0156	4.02e-08	++	0	0.002	1	0.9683	rs6573559	MTHFD1, ZBTB25	intron	1.08937	(1.056 - 1.124)	0.94
15q22.33	15	67150258	t	c	0.0941	0.0165	1.206e-08	++	36.2	1.568	1	0.2106	rs17293632	SMAD3	intron	1.09867	(1.063 - 1.135)	1.155
16p13.13	16	11131109	a	g	0.1457	0.018	5.178e-16	++	0	0.216	1	0.6424	rs36045143	CLEC16A	intron	1.15685	(1.116 - 1.199)	0.909
16p12.1	16	27357512	a	g	0.1402	0.021	2.536e-11	++	0	0.866	1	0.3521	rs2891058	IL4R	intron	1.1505	(1.104 - 1.199)	0.986
16q22.1	16	68537086	a	t	-0.1023	0.0186	4.073e-08	--	0	0.303	1	0.5819	rs1728797	ZFP90	intron	0.902759	(0.87 - 0.937)	1.095
17p13.2	17	4632019	a	g	-1.1078	0.1056	9.437e-26	--	1.9	1.019	1	0.3127	rs34210653	ALOX15	missense	0.330285	(0.268 - 0.406)	0.675
17q12	17	39657603	c	g	-0.0948	0.0154	7.358e-10	--	0	0.025	1	0.8736	rs11869286	STARD3	intron	0.909555	(0.882 - 0.938)	1.073
17q21.32	17	47733988	c	g	-0.1521	0.0272	2.204e-08	--	66.5	2.986	1	0.08397	rs41444548	TBX21	intron	0.858902	(0.814 - 0.906)	1.057
19p13.3	19	1104079	a	g	-0.139	0.0186	8.746e-14	--	69.1	3.241	1	0.0718	rs4807542	GPX4	synonymous	0.870228	(0.839 - 0.903)	1.465
19q13.11	19	33227147	a	g	-0.1035	0.0183	1.676e-08	--	0	0.089	1	0.7649	rs11671925	SLC7A10	upstream	0.901676	(0.87 - 0.935)	1.496
19q13.2	19	41198399	t	c	0.1404	0.0147	1.522e-21	++	0	0.024	1	0.8779	rs338593	CYP2S1	intron	1.15073	(1.118 - 1.185)	1.067
21q22.12	21	35340290	a	t	0.0876	0.0154	1.306e-08	++	20.6	1.259	1	0.2618	rs8129030	RUNX1	intron	1.09155	(1.059 - 1.125)	1.018
22q11.21	22	19762002	a	g	-0.1153	0.0155	1.15e-13	--	44.4	1.797	1	0.1801	rs1978060	TBX1	intron	0.891099	(0.864 - 0.919)	1.07
22q12.3	22	37135077	t	c	-0.1053	0.0148	9.527e-13	--	0	0.063	1	0.8023	rs2543537	IL2RB	intron	0.900054	(0.874 - 0.927)	1.196

## Sheet: Supplementary Data 3
Band	CHR	POS	REF	ALT	BETA	SE	PVAL	DIRECTION	HetISq	HetChiSq	HetDf	HetPVal	rsid	Nearest gene	Consequence	OR	CI	FE
5q22.1	5	111106674	c	g	0.1451	0.0239	1.24e-09	+-	68.8	3.209	1	0.07326	rs79411074	WDR36	intron	1.15616	(1.103 - 1.212)	2.491
6p21.32	6	32476553	a	c	-0.1058	0.0116	8.994e-20	--	0	0.053	1	0.8182	rs12207473	HLA-DRA	upstream	0.899605	(0.879 - 0.921)	1.027
9p24.1	9	6213387	a	g	-0.1046	0.0133	4.598e-15	--	8	1.087	1	0.2972	rs928413	IL33	upstream	0.900685	(0.877 - 0.925)	1.033
9q33.3	9	124305084	a	g	-0.066	0.0119	2.552e-08	--	0	0.057	1	0.8116	rs10739647	NEK6	intron	1.06823	(1.043 - 1.094)	1.089
16q24.3	16	89818509	a	g	-0.0663	0.0119	2.28e-08	--	0	0.081	1	0.7757	rs2079672	SPIRE2	non-coding transcript exon	1.06855	(1.044 - 1.094)	1.09

## Sheet: Supplementary Data 4
CHR	POS	REF	ALT	BETA	SE	PVAL	DIRECTION	HetISq	HetChiSq	HetDf	HetPVal	rsid	Nearest gene	OR	CI	FE
1	24875820	t	c	-0.0458	0.0067	5.584e-12	--	26.3	1.356	1	0.2442	rs3131526	RUNX3	0.955233	(0.942 - 0.968)	1.426
1	91706116	c	g	0.1001	0.0162	7.338e-10	++	73.9	3.827	1	0.05043	rs114425738	TGFBR3	1.10528	(1.07 - 1.141)	3.116
1	113761186	a	c	0.0448	0.0075	2.4e-09	++	9.9	1.11	1	0.2922	rs6679677	RSBN1	1.04582	(1.03 - 1.062)	1.471
1	167445635	t	c	-0.0396	0.0056	1.512e-12	--	0	0.78	1	0.3772	rs840012	CD247	0.961174	(0.95 - 0.972)	0.563
1	172776144	t	c	0.0317	0.0053	2.514e-09	++	0	0.446	1	0.5044	rs859722	FASLG	1.03221	(1.021 - 1.043)	1.266
1	198776737	t	c	0.0538	0.0085	3.094e-10	++	0	0.071	1	0.7903	rs7538393	PTPRC	1.05527	(1.037 - 1.073)	0.706
2	8298563	t	c	-0.0387	0.0054	7.104e-13	--	73.7	3.807	1	0.05103	rs346835	ID2	0.962039	(0.951 - 0.973)	1.119
2	102319699	a	t	-0.1182	0.0073	1.381e-58	--	93.3	14.993	1	0.0001079	rs72823641	IL18R1,IL1RL1	0.888518	(0.875 - 0.902)	1.239
2	103155940	t	c	-0.0654	0.01	5.762e-11	--	37.4	1.598	1	0.2062	rs75895309	TMEM182	0.936693	(0.918 - 0.956)	5.567
2	111117122	t	g	0.0845	0.0082	6.686e-25	++	0	0.089	1	0.7654	rs72836344	ACOXL	1.08817	(1.07 - 1.106)	0.971
2	156612298	t	c	0.0308	0.0054	1.591e-08	++	10.3	1.115	1	0.2911	rs62176646	GPD2	1.03128	(1.02 - 1.043)	1.286
2	162053893	a	g	0.0291	0.0053	2.937e-08	++	0	0.002	1	0.9681	rs4664446	DPP4	1.02953	(1.018 - 1.041)	0.875
2	203807141	a	c	0.0741	0.0119	5.65e-10	++	0	0.234	1	0.6289	rs62184059	CTLA4	1.07691	(1.052 - 1.103)	0.803
2	241759225	a	g	-0.0751	0.0061	1.89e-34	--	71	3.443	1	0.06353	rs34290285	D2HGDH	0.927651	(0.916 - 0.939)	0.835
3	12255041	a	g	0.0558	0.0074	3.439e-14	++	0	0.069	1	0.7926	rs7641345	PPARG	1.05739	(1.042 - 1.073)	0.979
3	33002847	t	c	-0.0396	0.0051	1.024e-14	--	78.7	4.702	1	0.03014	rs9828592	GLB1	0.961174	(0.951 - 0.971)	0.898
3	50161104	a	g	0.0293	0.0052	1.411e-08	++	30.5	1.438	1	0.2305	rs12631337	SEMA3F	1.02973	(1.019 - 1.041)	1.131
3	57943045	t	c	0.0319	0.0057	1.905e-08	++	21.1	1.268	1	0.2602	rs6796752	SLMAP	1.03241	(1.021 - 1.044)	1.059
3	71471739	a	c	0.0306	0.0052	3.627e-09	++	0	0.202	1	0.6529	rs57205040	FOXP1	1.03107	(1.02 - 1.042)	0.907
3	101741529	a	g	0.0314	0.0057	3.649e-08	++	0	0.066	1	0.7974	rs10936753	CEP97	1.0319	(1.02 - 1.044)	1.036
3	128265951	t	c	0.0468	0.008	5.072e-09	++	0	0.685	1	0.408	rs2811541	EEFSEC	1.04791	(1.031 - 1.065)	1.013
3	169064633	a	g	0.034	0.0057	1.876e-09	++	0	0.735	1	0.3914	rs16853094	MECOM	1.03458	(1.023 - 1.047)	1.413
3	188314847	t	c	-0.0444	0.0067	4.257e-11	--	0	0.007	1	0.9336	rs9823591	LPP	0.956571	(0.944 - 0.97)	1.646
3	193831619	t	c	-0.0339	0.0052	8.823e-11	--	0	0.226	1	0.6348	rs1146045	OPA1	0.966668	(0.956 - 0.977)	0.922
3	196625855	a	g	-0.0687	0.0115	2.383e-09	--	0	0.828	1	0.3628	rs4916514	NRROS	0.933607	(0.912 - 0.955)	0.777
4	38797027	a	c	-0.0408	0.0068	1.473e-09	--	44.8	1.812	1	0.1782	rs5743618	TLR1	0.960021	(0.947 - 0.973)	0.463
4	105897896	a	g	0.039	0.0058	2.268e-11	++	0	0.19	1	0.6632	rs34712979	NPNT	1.03977	(1.028 - 1.052)	1.051
4	122307977	t	c	-0.039	0.0055	1.62e-12	--	87.2	7.818	1	0.005173	rs7688384	KIAA1109	0.961751	(0.951 - 0.973)	0.984
5	35841347	a	g	0.0497	0.0053	6.329e-21	++	0	0.044	1	0.8341	rs10075764	IL7R	1.05096	(1.04 - 1.062)	1.209
5	110407391	t	c	0.0987	0.0147	1.741e-11	++	83.5	6.065	1	0.01379	rs73782464	TMEM232	1.10374	(1.072 - 1.136)	1.805
5	111066174	t	c	-0.1087	0.006	6.488e-73	--	22.7	1.293	1	0.2555	rs1837253	TSLP	0.896999	(0.886 - 0.908)	1.037
5	119355086	c	g	-0.0322	0.0053	1.46e-09	--	32.9	1.49	1	0.2223	rs3813308	TNFAIP8	0.968313	(0.958 - 0.979)	0.715
5	132461855	a	g	-0.0675	0.0051	1.648e-39	--	45.9	1.85	1	0.1738	rs6894249	C5orf56	0.934728	(0.925 - 0.945)	1.241
5	134115992	a	c	0.062	0.0082	5.231e-14	++	0	0.011	1	0.9178	rs5742913	TCF7	1.06396	(1.047 - 1.082)	1.013
5	142129717	a	g	-0.0446	0.0056	1.759e-15	--	0	0.005	1	0.9428	rs11743029	NDFIP1	0.95638	(0.945 - 0.967)	0.955
5	148476959	a	g	-0.0381	0.0052	1.649e-13	--	0	0.622	1	0.4304	rs7733410	HTR4	0.962617	(0.952 - 0.973)	0.922
5	160491328	t	c	-0.0319	0.0058	3.747e-08	--	0	0.001	1	0.972	rs61665417	PTTG1	0.968603	(0.957 - 0.98)	0.904
6	245096	t	c	0.0558	0.0098	1.099e-08	++	42.7	1.745	1	0.1865	rs6904506	DUSP22	1.05739	(1.037 - 1.078)	0.793
6	22520826	t	c	0.0326	0.0056	7.18e-09	++	0	0.168	1	0.6818	rs6901920	HDGFL1	1.03314	(1.021 - 1.045)	1.423
6	32647681	a	g	0.1047	0.0052	5.65e-91	++	97.1	34.894	1	3.481e-09	rs17612576	HLA-DQA1	1.11038	(1.099 - 1.122)	0.916
6	63620660	c	g	-0.0309	0.0056	4.32e-08	--	49.3	1.971	1	0.1603	rs17396843	PHF3	0.969573	(0.959 - 0.981)	0.763
6	90296508	a	g	-0.0636	0.0057	1.777e-28	--	57.2	2.335	1	0.1265	rs1504215	BACH2	0.93838	(0.928 - 0.949)	0.706
6	143546269	t	c	0.0604	0.0101	2.178e-09	++	0	0.186	1	0.6667	rs12206238	PHACTR2	1.06226	(1.041 - 1.084)	0.889
7	20401442	a	g	0.0332	0.0056	2.983e-09	++	0	0.192	1	0.661	rs13242474	ITGB8	1.03376	(1.022 - 1.046)	1.243
7	82887214	t	c	-0.0291	0.0051	1.149e-08	--	0	0.236	1	0.627	rs6965423	PCLO	0.971319	(0.961 - 0.982)	0.991
7	106018005	a	g	0.035	0.0061	9.708e-09	++	0	0	1	0.9866	rs6967330	CDHR3	1.03562	(1.023 - 1.049)	1.744
8	8461157	t	c	0.0313	0.0051	1.036e-09	++	17	1.205	1	0.2722	rs2921057	SGK223	1.03179	(1.021 - 1.043)	1.261
8	9133569	t	c	-0.0394	0.0067	3.089e-09	--	0	0.066	1	0.7976	rs55858845	PPP1R3B	0.961366	(0.948 - 0.975)	0.86
8	10930102	t	c	0.0305	0.0052	3.108e-09	++	0	0.272	1	0.6017	rs4240673	XKR6	1.03097	(1.02 - 1.042)	0.776
8	11951754	t	c	0.0314	0.0053	2.565e-09	++	0	0.001	1	0.9751	rs28510449	DEFB136	1.0319	(1.021 - 1.043)	0.709
8	80377390	t	g	-0.0466	0.0054	9.003e-18	--	66.5	2.986	1	0.084	rs4739737	ZBTB10	0.954469	(0.944 - 0.965)	1.091
9	6213148	a	g	0.1199	0.0058	4.26e-94	++	0	0.754	1	0.3853	rs928412	IL33	1.12738	(1.114 - 1.141)	1.033
9	119895034	a	g	-0.0292	0.0052	1.785e-08	--	64.9	2.848	1	0.09148	rs10984766	CDK5RAP2	0.971222	(0.961 - 0.982)	1.106
9	124289993	t	c	-0.0324	0.0054	1.513e-09	--	0	0.318	1	0.5727	rs7872321	NEK6	0.968119	(0.957 - 0.979)	1.013
10	6051176	t	c	-0.2145	0.0287	7.642e-14	--	0	0.22	1	0.6393	rs12722502	IL2RA	0.806945	(0.763 - 0.854)	0.167
10	8062759	t	c	-0.0434	0.0052	6.226e-17	--	0	0.585	1	0.4442	rs3824660	GATA3	0.957528	(0.947 - 0.968)	0.948
10	9016708	a	g	-0.0904	0.0054	2.114e-62	--	92.1	12.582	1	0.0003896	rs1444782	GATA3	0.913566	(0.903 - 0.924)	0.71
10	21504895	t	c	0.0295	0.0053	3.457e-08	++	0	0.766	1	0.3816	rs11012725	CASC10	1.02994	(1.019 - 1.041)	0.999
10	62649027	t	c	-0.0324	0.0053	1.221e-09	--	0	0.009	1	0.9242	rs10995258	ZNF365	0.968119	(0.958 - 0.979)	0.963
10	92777107	t	c	-0.0309	0.0051	1.469e-09	--	46.7	1.878	1	0.1706	rs2901610	EXOC6	0.969573	(0.959 - 0.98)	1.011
11	1116487	a	g	0.0324	0.0053	1.09e-09	++	74.8	3.97	1	0.04632	rs35225972	MUC5AC	1.03293	(1.022 - 1.044)	#N/A
11	61785208	t	g	-0.0385	0.0053	2.204e-13	--	70.8	3.425	1	0.06421	rs174537	FADS1	0.962232	(0.952 - 0.973)	1.307
11	65791795	a	g	-0.0365	0.0053	3.935e-12	--	0	0.025	1	0.8743	rs10791824	OVOL1	0.964158	(0.954 - 0.975)	1.112
11	76582682	t	g	0.0558	0.0051	1.508e-27	++	85.6	6.95	1	0.008384	rs7936312	EMSY	1.05739	(1.046 - 1.068)	0.857
11	128304886	a	g	-0.0403	0.0061	3.28e-11	--	2.3	1.023	1	0.3118	rs73018933	ETS1	0.960501	(0.949 - 0.972)	1.113
12	47814585	t	c	0.0365	0.0051	1.028e-12	++	71	3.448	1	0.06331	rs11168249	HDAC7	1.03717	(1.026 - 1.048)	1.115
12	56052982	t	c	0.0457	0.0054	2.551e-17	++	82.3	5.651	1	0.01744	rs61938962	RPS26	1.04676	(1.035 - 1.058)	0.963
12	57109992	t	c	0.0414	0.0052	1.215e-15	++	92.5	13.271	1	0.0002696	rs167769	STAT6	1.04227	(1.031 - 1.053)	1.104
12	94169099	c	g	-0.0476	0.0079	1.464e-09	--	25.4	1.341	1	0.2469	rs2361359	PLXNC1	0.953515	(0.938 - 0.969)	1.031
12	123034565	a	g	0.0804	0.0141	1.287e-08	++	0	0.029	1	0.8643	rs17884869	PITPNM2	1.08372	(1.054 - 1.114)	1.24
13	39794307	a	g	0.044	0.0054	3.09e-16	++	0	0.671	1	0.4128	rs11618582	COG6	1.04498	(1.034 - 1.057)	0.978
13	99352087	t	c	-0.0471	0.0053	8.092e-19	--	71.8	3.547	1	0.05966	rs1923897	UBAC2	0.953992	(0.944 - 0.964)	0.903
14	65075889	t	c	0.029	0.0052	1.918e-08	++	85.9	7.067	1	0.00785	rs1957949	MAX	1.02942	(1.019 - 1.04)	1.111
14	68295488	t	g	-0.0347	0.0052	3.641e-11	--	25.9	1.35	1	0.2452	rs11158728	RAD51B	0.965895	(0.956 - 0.976)	0.957
14	92663465	t	c	-0.0323	0.0054	2.458e-09	--	0	0.268	1	0.605	rs9323880	RIN3	0.968216	(0.958 - 0.979)	0.898
15	41190033	t	c	0.0603	0.0098	6.448e-10	++	0	0.172	1	0.6787	rs16971598	EXD1	1.06216	(1.042 - 1.083)	2.379
15	60778755	t	c	0.0606	0.0067	8.362e-20	++	83.9	6.22	1	0.01263	rs7173981	RORA	1.06247	(1.048 - 1.077)	1.231
15	67163292	t	c	0.0817	0.0058	3.47e-45	++	76.8	4.31	1	0.03789	rs56062135	SMAD3	1.08513	(1.072 - 1.098)	1.158
16	11125184	a	g	-0.0677	0.0062	8.275e-28	--	59.7	2.478	1	0.1154	rs12935657	CLEC16A	0.934541	(0.923 - 0.946)	0.908
16	27353485	a	g	0.0543	0.0054	4.968e-24	++	0	0.019	1	0.8914	rs3024619	IL4R	1.0558	(1.044 - 1.067)	0.913
16	29933511	a	g	0.0294	0.0051	8.059e-09	++	91.3	11.557	1	0.0006751	rs12716974	KCTD13	1.02984	(1.019 - 1.041)	0.891
16	31009757	t	c	0.0338	0.0052	9.359e-11	++	0	0.591	1	0.4421	rs7184567	STX1B	1.03438	(1.023 - 1.045)	1.011
16	60633363	a	c	0.0283	0.0051	2.992e-08	++	0	0.614	1	0.4334	rs11645550	RP11-457D20.2	1.0287	(1.018 - 1.039)	1.009
16	89649843	t	c	-0.033	0.0053	3.556e-10	--	46.2	1.86	1	0.1727	rs2437956	CHMP1A	0.967539	(0.957 - 0.978)	0.83
17	4632019	a	g	-0.144	0.024	1.987e-09	--	0	0.965	1	0.3258	rs34210653	ALOX15	0.865888	(0.826 - 0.908)	0.675
17	16025689	a	c	0.0301	0.0051	3.659e-09	++	0	0.313	1	0.5759	rs62073587	TTC19	1.03056	(1.02 - 1.041)	1.09
17	39912261	t	c	-0.0707	0.0051	1.641e-43	--	0	0.514	1	0.4733	rs1011082	GSDMB	0.931741	(0.922 - 0.942)	0.879
17	42294404	a	c	-0.0367	0.0058	3.248e-10	--	0	0.368	1	0.544	rs16967637	STAT5A	0.963965	(0.953 - 0.975)	0.784
17	49370984	a	g	0.0563	0.0052	1.982e-27	++	0	0.009	1	0.9263	rs12952581	ZNF652	1.05792	(1.047 - 1.069)	1.182
18	63193013	t	c	0.0317	0.0055	7.378e-09	++	0	0.052	1	0.8199	rs12457700	BCL2	1.03221	(1.021 - 1.044)	0.85
18	69869381	t	c	-0.028	0.0051	4.219e-08	--	0	0.037	1	0.8483	rs8099412	CD226	0.972388	(0.962 - 0.983)	0.872
19	1044329	t	c	-0.034	0.0057	2.725e-09	--	0	0.306	1	0.58	rs4147909	ABCA7	0.966572	(0.955 - 0.978)	1.082
19	33235672	a	c	-0.0871	0.0094	2.253e-20	--	0	0.065	1	0.7981	rs117710327	SLC7A10	0.916585	(0.899 - 0.934)	1.483
20	63685277	t	c	0.0319	0.0057	2.065e-08	++	0	0.021	1	0.885	rs3787089	RTEL1	1.03241	(1.021 - 1.044)	1.067
21	35340290	a	t	0.0382	0.0053	8.706e-13	++	73.2	3.732	1	0.05338	rs8129030	RUNX1	1.03894	(1.028 - 1.05)	1.018
22	37135396	a	g	-0.0414	0.0052	9.904e-16	--	0	0.657	1	0.4177	rs228953	IL2RB	0.959445	(0.949 - 0.97)	1.207

## Sheet: Supplementary Data 5
																	Threshold	Asthma	Shared	CRSwNP	Unassigned
																	0.9	20	71	14	26
											Asthma impact				CRSwNP impact		BAYESIAN GROUP
Band	Lead variant	CHR	Position (hg38)	REF	ALT	Gene	Conseuence	AF	b_a	se_a	OR	95 % CI	b_np	se_np	OR	95 % CI	Asthma	Shared	CRSwNP	ASSIGNED	PheWAS	OMIM (nearest gene)	Atopic dermatitis	Allergy	Childhood	Autoimmune	Asthma-related infections
1p36.11	rs3131526	1	24875820	C	T	RUNX3	regulatory region	0.22	-0.0461	0.0074	0.954946	(0.941-0.969)	-0.0865	0.0191	0.917136	(0.883-0.953)	0.0001	0.9999	0	Shared	Childhood asthma	-	NO	NO	YES	NO	NO
1p22.1	rs114425738	1	91706116	G	C	TGFBR3	intron	0.031	0.1193	0.0179	1.12671	(1.087-1.167)	0.1113	0.0474	1.11773	(1.018-1.227)	0.1778	0.8222	0	Unassigned	Allergic asthma; allergic conjunctivitis; asthma-related infections	-	NO	YES	NO	NO	YES
1p13.2	rs6679677	1	113761186	C	A	RSBN1	upstream	0.14	0.0467	0.0083	1.04781	(1.03-1.065)	0.069	0.0214	1.07144	(1.027-1.118)	0.0023	0.9977	0	Shared	Hypothyroidism; T1DM; Rheumatoid arthritis; Autoimmune diseases; CDTA (-); Basal cell carcinoma (-); vit B12 deficiency anemia; Chronic gastritis; Oral lichen ruber planus	- (PTPN22 has many of the characteristics in PheWAS)	NO	NO	NO	YES	NO
1q21.3	rs3754211	1	150979381	G	A	ANXA9	upstream	0.45	0.0028	0.0058	1.0028	(0.991-1.015)	0.1155	0.0146	1.12243	(1.09-1.156)	0	0	1	CRSwNP	Basal cell carcinoma (-); actinic ceratosis (-); CDTA (+)	-	NO	NO	#N/A	NO	#N/A
1q21.3	rs61816761	1	152313385	G	A	FLG	stop gain	0.0029	0.1596	0.0292	1.17304	(1.107-1.243)	-0.0158	0.0854	0.984324	(0.832-1.164)	0.9878	0.0122	0	Asthma	Atopic dermatitis	Ichthyosis vulgaris; susceptibility to atopic dermatitis	YES	NO	NO	NO	NO
1q24.2	rs840012	1	167445635	C	T	CD247	intron	0.26	-0.0427	0.0061	0.958199	(0.946-0.97)	-0.0915	0.0162	0.912561	(0.884-0.943)	0	1	0	Shared	Rheumatoid arthritis	Immunodeficiency 25	NO	NO	NO	NO	NO
1q24.3	rs859722	1	172776144	T	C	FASLG	intron	0.41	-0.0398	0.0059	0.960982	(0.949-0.973)	-0.0597	0.0152	0.942047	(0.914-0.971)	0.0003	0.9997	0	Shared	Atopic dermatitis	Autoimmune lymphoproliferative syndrome, type IB, (susceptibility to lung cancer)	YES	NO	NO	NO	NO
1q32.1	rs7538393	1	198776737	T	C	PTPRC	regulatory region	0.09	0.0549	0.0094	1.05643	(1.037-1.077)	0.1425	0.0253	1.15315	(1.097-1.212)	0	1	0	Shared	Age-related macular degeneration; Asthma/COPD	Severe combined immunodeficiency	NO	NO	NO	NO	NO
1q32.1	rs6664108	1	203090600	T	C	ADORA1	upstream	0.68	-0.0377	0.0061	0.963002	(0.951-0.975)	0	0.0158	1	(0.969-1.032)	0.9936	0.0064	0	Asthma	Atrial fibrillation (-)	-	NO	NO	NO	NO	NO
2p25.1	rs346835	2	8298563	C	T	ID2	intron	0.36	-0.0417	0.0059	0.959157	(0.948-0.971)	-0.0227	0.0154	0.977556	(0.948-1.008)	0.8494	0.1506	0	Unassigned	Allergic conjunctivitis; Hypothyroidism; Allergic asthma	-	NO	YES	NO	NO	NO
2p23.3	rs11894248	2	24633890	A	G	NCOA1	intron	0.29	0.0048	0.0063	1.00481	(0.992-1.018)	0.1031	0.016	1.1086	(1.074-1.144)	0	0	1	CRSwNP	Height; BMI (-); Hernia; Autoimmune diseases (-); Statin medication (-)	-	NO	NO	#N/A	YES	#N/A
2q12.1	rs72823641	2	102319699	T	A	IL18R1/IL1RL1	intron	0.16	-0.1242	0.0081	0.883203	(0.869-0.898)	-0.1518	0.0211	0.85916	(0.824-0.896)	0	1	0	Shared	Allergic conjunctivitis; Childhood asthma; Atopic dermatitis; Allergic asthma	-	YES	YES	YES	NO	NO
2q12.1	rs75895309	2	103155940	C	T	TMEM182	intron	0.11	-0.0699	0.0112	0.932487	(0.912-0.954)	-0.0653	0.0277	0.936786	(0.887-0.99)	0.1263	0.8737	0	Unassigned	Asthma-related infections; Arthrosis; Obesity related asthma	-	NO	NO	NO	NO	YES
2q13	rs72836344	2	111117122	G	T	ACOXL	intron	0.11	0.0952	0.009	1.09988	(1.08-1.12)	0.1394	0.023	1.14958	(1.098-1.203)	0	1	0	Shared	Umbilical hernia; Asthma-related infections; Suggestive for eosinophilic asthma; Peritonsillar abscess	-	NO	NO	NO	NO	YES
2q22.3	rs10427396	2	145790450	T	C	ZEB2	intergenic	0.089	-0.0045	0.0103	0.99551	(0.975-1.016)	-0.179	0.0267	0.836106	(0.793-0.882)	0	0	1	CRSwNP	Coronary angio (+); stenosis or insufficiency of lacrimal passages (+); Deviated nasal septum (-)	#N/A	NO	NO	#N/A	NO	#N/A
2q24.1	rs62176646	2	156612298	C	T	GPD2	intron	0.35	0.0312	0.006	1.03169	(1.019-1.044)	0.0012	0.0157	1.0012	(0.97-1.033)	0.9467	0.0532	0.0001	Asthma	-	T2DM	NO	NO	NO	NO	NO
2q24.2	rs4664446	2	162053893	A	G	DPP4	intron	0.43	-0.0319	0.0058	0.968603	(0.957-0.98)	-0.035	0.015	0.965605	(0.937-0.995)	0.0482	0.9518	0	Shared	T1DM (+)	-	NO	NO	NO	NO	NO
2q33.2	rs62184059	2	203807141	C	A	CTLA4	intergenic	0.044	0.0688	0.0131	1.07122	(1.044-1.1)	0.1487	0.0334	1.16032	(1.086-1.239)	0	1	0	Shared	Autoimmune diseases	Immune dysregulation with autoimmunity, immune deficiency, and lymphoproliferation	NO	NO	NO	YES	NO
2q37.1	rs6704768	2	232727791	G	A	GIGYF2	intron	0.52	-0.0104	0.0057	0.989654	(0.978-1.001)	-0.1217	0.0146	0.885414	(0.86-0.912)	0	0	1	CRSwNP	Viral meningitis	Parkinson's disease	NO	NO	#N/A	NO	#N/A
2q37.3	rs34290285	2	241759225	G	A	D2HGDH	intron	0.22	-0.0842	0.0068	0.919247	(0.907-0.932)	-0.0976	0.0177	0.907012	(0.876-0.94)	0	1	0	Shared	Allergic asthma; Allergic conjunctivitis; Atopic dermatitis	D-2-Hydroxygluturic aciduria	YES	YES	NO	NO	NO
3p25.3	rs59105104	3	10467515	G	C	ATP2B2	intron	0.31	-0.034	0.006	0.966572	(0.955-0.979)	0.0033	0.0157	1.00331	(0.972-1.035)	0.9898	0.0102	0	Asthma	-	Deafness	NO	NO	NO	NO	NO
3p25.2	rs7641345	3	12255041	A	G	PPARG	downstream	0.86	0.0522	0.0081	1.05359	(1.036-1.071)	0.031	0.0211	1.03149	(0.989-1.076)	0.757	0.243	0	Unassigned	-	Type 2 diabetes	NO	NO	NO	NO	NO
3p22.3	rs9828592	3	33002847	T	C	GLB1	intron	0.49	0.046	0.0056	1.04707	(1.035-1.059)	0.081	0.0146	1.08437	(1.053-1.116)	0	1	0	Shared	Asthma-related infections	GM1-gangliosidosis type I-III; Mucopolysaccharidosis type IVB (Morquio)	NO	NO	NO	NO	YES
3p21.31	rs12631337	3	50161104	A	G	SEMA3F	intron	0.61	-0.033	0.0057	0.967539	(0.956-0.979)	-0.0283	0.0148	0.972097	(0.944-1.001)	0.1935	0.8065	0	Unassigned	Pain; Arthrosis; Varicose veins	-	NO	NO	NO	NO	NO
3p14.3	rs6796752	3	57943045	T	C	SLMAP	downstream	0.3	-0.0326	0.0063	0.967926	(0.956-0.98)	-0.0228	0.0162	0.977458	(0.946-1.009)	0.3826	0.6173	0.0001	Unassigned	Asthma-related infections	- (FLNB: Larsen syndrome; Atelosteogenesis; Spondylocarpotarsal synostosis syndrome; Boomerang dysplasia	NO	NO	NO	NO	YES
3p13	rs57205040	3	71471739	A	C	FOXP1	intron	0.4	-0.0262	0.0057	0.97414	(0.963-0.986)	-0.1246	0.015	0.88285	(0.857-0.91)	0	0.7895	0.2105	Unassigned	Basal cell carcinoma (+); Actinic keratosis (+); Lichen planus; Endometriosis (+)	Intellectual developmental disorder with language impairment with or without autistic features	NO	NO	NO	NO	NO
3q12.3	rs10936753	3	101741529	A	G	CEP97	intron	0.74	-0.0323	0.0063	0.968216	(0.956-0.981)	-0.0385	0.0164	0.962232	(0.931-0.994)	0.0312	0.9688	0	Shared	-	-	NO	NO	NO	NO	NO
3q21.3	rs2811541	3	128265951	C	T	EEFSEC	intron	0.88	0.0518	0.0088	1.05317	(1.035-1.072)	-0.0095	0.0224	0.990545	(0.947-1.036)	0.9981	0.0019	0	Asthma	Prostate cancer (-)	-	NO	NO	NO	NO	NO
3q26.2	rs16853094	3	169064633	G	A	MECOM	intergenic	0.31	0.0321	0.0062	1.03262	(1.02-1.046)	0.0492	0.0161	1.05043	(1.017-1.085)	0.0032	0.9968	0	Shared	Sleep apnoea (-)	Radioulnar synostosis with amegakaryocytic thrombocytopenia	NO	NO	NO	NO	NO
3q28	rs9823591	3	188314847	T	C	LPP	intron	0.2	0.0409	0.0075	1.04175	(1.026-1.058)	0.0611	0.019	1.06301	(1.024-1.104)	0.0015	0.9985	0	Shared	Height	Lipoma; Acute myeloid leukemia	NO	NO	NO	NO	NO
3q29	rs1146045	3	193831619	T	C	OPA1	intron	0.36	0.037	0.0058	1.03769	(1.025-1.05)	0.0291	0.015	1.02953	(0.999-1.061)	0.3096	0.6904	0	Unassigned	Childhood asthma	Optic atrophy; Optic atrophy plus syndrome; susceptibility to normal tension glaucoma; Behr syndrome; Mitochondrial DNA depletion syndrome	NO	NO	YES	NO	NO
3q29	rs4916514	3	196625855	G	A	NRROS	intergenic	0.05	-0.0712	0.0126	0.931276	(0.908-0.955)	-0.1028	0.0334	0.902307	(0.845-0.964)	0.0044	0.9956	0	Shared	Autoimmune diseases	Early-onset seizures with neurodegeneration and brain calcification	NO	NO	NO	YES	NO
4p14	rs5743618	4	38797027	C	A	TLR1	missense	0.16	-0.0505	0.0074	0.950754	(0.937-0.965)	0.0041	0.0194	1.00411	(0.966-1.044)	0.9999	0.0001	0	Asthma	Allergic conjunctivitis; allergic rhinitis; Allergic asthma; Childhood allergy	Leprosy	NO	YES	YES	NO	NO
4q24	rs34712979	4	105897896	G	A	NPNT	splice region	0.25	0.0502	0.0064	1.05148	(1.038-1.065)	0.0147	0.0168	1.01481	(0.981-1.049)	0.9964	0.0036	0	Asthma	Angina pectoris (-)	-	NO	NO	NO	NO	NO
4q27	rs7688384	4	122307977	T	C	KIAA1109	synonymous	0.31	-0.0418	0.0061	0.959062	(0.947-0.971)	-0.0471	0.0158	0.953992	(0.924-0.984)	0.0148	0.9852	0	Shared	Atopic dermatitis; Allergic conjunctivitis; T1DM; Allergic rhinitis;	Alkuraya-Kucinskas syndrome	YES	YES	NO	NO	NO
4q28.1	rs1364871	4	123755424	T	A	SPRY1	intron	0.85	-0.0452	0.008	0.955806	(0.94-0.971)	0.0276	0.0212	1.02798	(0.986-1.072)	0.9995	0.0005	0	Asthma	Hypertension (+)	-	NO	NO	NO	NO	NO
4q31.21	rs1032297	4	144513592	A	G	HHIP	intron	0.53	-0.035	0.0057	0.965605	(0.954-0.977)	0.0207	0.0148	1.02092	(0.991-1.051)	0.9998	0.0002	0	Asthma	COPD; Spondylolisthesis/Spondylolysis	-	NO	NO	NO	NO	NO
5p15.2	rs16903574	5	14610200	C	G	FAM105A	missense	0.13	0.0577	0.0092	1.0594	(1.04-1.079)	0.0454	0.0236	1.04645	(0.999-1.096)	0.3488	0.6512	0	Unassigned	Atopic dermatitis; T2DM	-	YES	NO	NO	NO	NO
5p13.2	rs10075764	5	35841347	A	G	IL7R	regulatory region	0.39	-0.0464	0.0058	0.95466	(0.943-0.966)	-0.102	0.0152	0.90303	(0.876-0.931)	0	1	0	Shared	Autoimmune diseases; Dermatitis and ecema; Hypothyroidism	Severe combined immunodeficiency	NO	NO	NO	YES	NO
5q22.1	rs73782464	5	110407391	T	C	TMEM232	intron	0.04	-0.0856	0.0163	0.917961	(0.889-0.948)	-0.1819	0.0427	0.833685	(0.766-0.907)	0.0001	0.9999	0	Shared	CRS	-	NO	NO	NO	NO	NO
5q22.1	rs1837253	5	111066174	T	C	TSLP	upstream	0.75	0.1049	0.0066	1.1106	(1.096-1.126)	0.2918	0.0179	1.33884	(1.292-1.387)	0	1	0	Shared	CRS; Asthma-related infections; Childhood asthma; Allergic asthma; Suggestive for eosinophilic asthma; Allergic rhinitis	- (WDR36: Open angle glaucoma)	NO	YES	YES	NO	YES
5q23.1	rs3813308	5	119355086	C	G	TNFAIP8	5' UTR	0.32	0.0356	0.0059	1.03624	(1.024-1.049)	0.0565	0.0152	1.05813	(1.027-1.091)	0.0004	0.9996	0	Shared	-	-	NO	NO	NO	NO	NO
5q31.1	rs11738827	5	131381397	C	T	CDC42SE2	intron	0.27	-0.052	0.0062	0.949329	(0.937-0.961)	-0.1479	0.0163	0.862517	(0.835-0.891)	0	1	0	Shared	Height (+); Atopic dermatitis; Suggestive for eosinophilic asthma; Weight (+); Chalazion (+); Asthma-related infections; IBD (+)	-	YES	NO	NO	NO	YES
5q31.1	rs6894249	5	132461855	A	G	C5orf56	non-coding exon	0.46	0.077	0.0057	1.08004	(1.068-1.093)	0.1435	0.0146	1.15431	(1.121-1.188)	0	1	0	Shared	Asthma-related infections; Allergic asthma; Childhood asthma; IBD (-); Suggestive for eosinophilic asthma; Ulcerative rectosigmoiditis (-); Obesity-related asthma; Psoriasis (-); PCOS (-); HER+ positive breast cancer	-	NO	YES	YES	NO	YES
5q31.1	rs5742913	5	134115992	C	A	TCF7	missense	0.1	0.0571	0.0091	1.05876	(1.04-1.078)	0.1033	0.0232	1.10882	(1.059-1.161)	0	1	0	Shared	CRS	-	NO	NO	NO	NO	NO
5q31.3	rs11743029	5	142129717	G	A	NDFIP1	intron	0.29	-0.0451	0.0062	0.955902	(0.944-0.968)	-0.0893	0.0162	0.914571	(0.885-0.945)	0	1	0	Shared	-	-	NO	NO	NO	NO	NO
5q32	rs7733410	5	148476959	G	A	HTR4	intron	0.42	-0.0434	0.0057	0.957528	(0.946-0.969)	-0.0281	0.0148	0.972291	(0.944-1.001)	0.732	0.268	0	Unassigned	Obesity related asthma; COPD	-	NO	NO	NO	NO	NO
5q33.3	rs61665417	5	160491328	C	T	PTTG1	downstream	0.26	-0.0318	0.0064	0.9687	(0.956-0.981)	-0.076	0.0168	0.926816	(0.896-0.958)	0	1	0	Shared	-	-	NO	NO	NO	NO	NO
6p25.3	rs6904506	6	245096	T	C	DUSP22	intergenic	0.07	-0.0506	0.0107	0.950659	(0.93-0.971)	-0.1568	0.029	0.854875	(0.807-0.905)	0	1	0	Shared	-	-	NO	NO	NO	NO	NO
6p25.3	rs1050979	6	410417	A	G	IRF4	3' UTR	0.47	0.0158	0.0056	1.01593	(1.004-1.028)	0.1073	0.0146	1.11327	(1.081-1.146)	0	0.0134	0.9866	CRSwNP	Type 1 diabetes; Autoimmune diseases; Hypothyroidism; Lymphoid leukaemia	Variation in skin/hair/eye pigmentation	NO	NO	#N/A	YES	#N/A
6p22.3	rs6901920	6	22520826	T	C	HDGFL1	intergenic	0.33	-0.0347	0.0062	0.965895	(0.954-0.978)	-0.0413	0.016	0.959541	(0.929-0.991)	0.0231	0.9769	0	Shared	-	-	NO	NO	NO	NO	NO
6p21.32	rs17612576	6	32647681	G	A	HLA-DQA1	downstream	0.53	0.1171	0.0057	1.12423	(1.111-1.137)	0.1759	0.0148	1.19232	(1.158-1.228)	0	1	0	Shared	#N/A	#N/A	#N/A	#N/A	#N/A	#N/A	#N/A
6p21.31	rs72901705	6	35152114	A	G	TCP11	upstream	0.049	0.0614	0.0107	1.06332	(1.041-1.086)	0.0574	0.0286	1.05908	(1.001-1.121)	0.1485	0.8515	0	Unassigned	Height; Chronic pancreatitis	-	NO	NO	NO	NO	NO
6q12	rs17396843	6	63620660	G	C	PHF3	upstream	0.27	-0.033	0.0062	0.967539	(0.955-0.98)	-0.0275	0.0161	0.972875	(0.942-1.005)	0.2187	0.7813	0	Unassigned	-	-	NO	NO	NO	NO	NO
6q15	rs1504215	6	90296508	G	A	BACH2	5' UTR	0.24	-0.0658	0.0063	0.936318	(0.924-0.948)	-0.1417	0.0167	0.867882	(0.839-0.897)	0	1	0	Shared	Atopic dermatitis; Allergic asthma; Asthma-related infections; Hypothyroidism (+); Type 1 diabetes (+); Autoimmune diseases (+); Basal cell carcinoma	Immunodeficiency 60 and autoimmunity	YES	YES	NO	YES	YES
6q24.2	rs12206238	6	143546269	C	T	PHACTR2	intron	0.062	0.0627	0.0111	1.06471	(1.041-1.089)	0.1291	0.0283	1.1378	(1.076-1.203)	0.0001	0.9999	0	Shared	Suggestive for eosinophilic asthma	-	NO	NO	NO	NO	NO
7p21.1	rs13242474	7	20401442	A	G	ITGB8	intron	0.32	-0.0404	0.0062	0.960405	(0.948-0.973)	-0.0207	0.016	0.979513	(0.949-1.011)	0.8479	0.1521	0	Unassigned	Height	-	NO	NO	NO	NO	NO
7p15.3	rs2069832	7	22727814	A	G	IL6	intron	0.47	0.0314	0.0056	1.0319	(1.02-1.044)	0.0319	0.0147	1.03241	(1.003-1.063)	0.0754	0.9246	0	Shared	Aortic valce calcification (-); Varicose veins (-); Coronary atherosclerosis (-); Ischaemic heart disease (-)	Type 2 diabetes; Systemic juvenile rheumatoid arthritis; Susceptibility to intracranial hemorrhage in brain cerebrovascular malformations; T1DM; Crohn-disease associated growth failure; Susceptibility to Kaposi's Sarcoma	NO	NO	NO	NO	NO
7p15.1	rs12531540	7	28123055	C	T	JAZF1	intron	0.49	-0.0252	0.0056	0.975115	(0.964-0.986)	-0.0837	0.0146	0.919707	(0.893-0.947)	0	0.9991	0.0009	Shared	Height	-	NO	NO	NO	NO	NO
7q21.11	rs6965423	7	82887214	T	C	PCLO	intron	0.5	0.0269	0.0056	1.02727	(1.016-1.039)	0.0341	0.0146	1.03469	(1.005-1.065)	0.0337	0.9663	0	Shared	All anxiety disorders	Pontocerebellar hypoplasia	NO	NO	NO	NO	NO
7q22.3	rs6967330	7	106018005	G	A	CDHR3	missense	0.27	0.0283	0.0068	1.0287	(1.015-1.043)	0.0436	0.0174	1.04456	(1.009-1.081)	0.0124	0.9873	0.0003	Shared	Diseases of middle ear and mastoid; Acute sinusitis; Suppurative and unspecified otitis media; Nonsuppurative otitis media; CRS; Acute suppurative otitis	Respiratory viral disease variant; Known CRS variant	NO	NO	NO	NO	NO
8p23.1	rs2921057	8	8461157	C	T	SGK223	non-coding exon	0.53	0.0356	0.0057	1.03624	(1.024-1.048)	0.0098	0.0147	1.00985	(0.981-1.04)	0.958	0.042	0	Asthma	Nontoxic goitre/thyroid nodule; Hypertension; Episodal and paroysmal disorders; Peritonsillar abscess; Type 2 diabetes; Hypothyroidism (-); Erysipelas; BMI; gestational hypertension	-	NO	NO	NO	NO	NO
8p23.1	rs55858845	8	9133569	T	C	PPP1R3B	downstream	0.17	0.0498	0.0073	1.05106	(1.036-1.067)	-0.0098	0.0192	0.990248	(0.953-1.029)	1	0	0	Asthma	Asthma-related infections; hypertension; Pregnancy hypertension	-	NO	NO	NO	NO	YES
8p23.1	rs4240673	8	10930102	T	C	XKR6	intron	0.46	-0.0369	0.0057	0.963773	(0.953-0.975)	-0.0134	0.0148	0.986689	(0.958-1.016)	0.9372	0.0628	0	Asthma	Hypertension; Episodal and paroysmal disorders; Nontoxic goitre/thyroid nodule; Type 2 diabetes; Atherosclerosis; Sleep apnoea; Parodontitis; Dorsopathies; Arthrosis; BMI; Iron deficiency anemia; Erysipelas	-	NO	NO	NO	NO	NO
8p23.1	rs28510449	8	11951754	T	C	DEFB136	intergenic	0.37	-0.037	0.0058	0.963676	(0.952-0.975)	0.0023	0.0151	1.0023	(0.973-1.033)	0.9973	0.0027	0	Asthma	Nontoxic goitre/thyroid nodule; Hypertension; Episodal and paroysmal disorders; Tonsillectomy; Type 2 diabetes; Erysipelas; Parodontitis	-	NO	NO	NO	NO	NO
8q21.13	rs4739737	8	80377390	G	T	ZBTB10	intron	0.69	-0.0534	0.006	0.948001	(0.936-0.96)	-0.0538	0.0156	0.947622	(0.919-0.978)	0.0156	0.9844	0	Shared	Atopic dermatitis; Allergic asthma; Allergic conjunctivitis	-	YES	YES	NO	NO	NO
8q22.3	rs646836	8	102119520	T	C	NCALD	intron	0.64	-0.0337	0.006	0.966862	(0.955-0.979)	-0.0018	0.0155	0.998202	(0.968-1.029)	0.9733	0.0267	0	Asthma	-	-	NO	NO	NO	NO	NO
8q24.12	rs4618726	8	118997146	C	A	COLEC10	intron	0.56	0.0003	0.0057	1.0003	(0.989-1.012)	-0.1056	0.0146	0.899784	(0.874-0.926)	0	0	1	CRSwNP	Autoimmune diseases; Papulosuamous disorders; Suggestive for eosinophilic asthma; Vitamin B12 deficiency anaemia; Hypothyroidism	3MC syndrome (facial dysmorphisms)	NO	NO	#N/A	YES	#N/A
8q24.3	rs116877855	8	141408317	C	T	PTP4A3	intron	0.045	-0.0152	0.0135	0.984915	(0.959-1.012)	0.179	0.0327	1.19602	(1.121-1.276)	0	0.0002	0.9998	CRSwNP	-	-	NO	NO	#N/A	NO	#N/A
9p24.1	rs928412	9	6213148	A	G	IL33	upstream	0.76	-0.1035	0.0064	0.901676	(0.89-0.914)	-0.314	0.016	0.730519	(0.707-0.754)	0	1	0	Shared	CRS; Asthma-related infections; Childhood asthma; Allergic asthma; Suggestive for eosinophilic asthma; Allergic rhinitis	-	NO	YES	YES	NO	YES
9q22.33	rs7044307	9	99357187	G	A	SEC61B	intron	0.27	-0.0056	0.0068	0.994416	(0.981-1.008)	-0.1051	0.0177	0.900234	(0.869-0.933)	0	0.0007	0.9993	CRSwNP	Height (+); Weight (+)	-	NO	NO	#N/A	NO	#N/A
9q33.2	rs10984766	9	119895034	A	G	CDK5RAP2	intergenic	0.42	-0.0283	0.0057	0.972097	(0.961-0.984)	-0.0299	0.0149	0.970543	(0.942-1)	0.0767	0.9233	0	Shared	Paracetamol	-	NO	NO	NO	NO	NO
9q33.3	rs7872321	9	124289993	C	T	NEK6	intron	0.35	-0.0255	0.0059	0.974822	(0.963-0.987)	-0.0416	0.0153	0.959253	(0.93-0.989)	0.009	0.9908	0.0002	Shared	Hypothyroidism; CRS; CDTA; Autoimmune diseases; Arthropathies	-	NO	NO	NO	YES	NO
9q34.11	rs4837346	9	129173188	C	T	IER5L	upstream	0.71	0.0362	0.0061	1.03686	(1.024-1.05)	0.0178	0.0159	1.01796	(0.986-1.051)	0.7751	0.2249	0	Unassigned	Statin medication; Asthma-related infections	-	NO	NO	NO	NO	YES
10p15.1	rs12722502	10	6051176	C	T	IL2RA	intron	0.0043	-0.2187	0.0311	0.803563	(0.756-0.855)	-0.1738	0.0801	0.840465	(0.718-0.984)	0.709	0.291	0	Unassigned	-	Immunodeficiency 41 with lymphoproliferation and autoimmunity	NO	NO	NO	NO	NO
10p14	rs3824660	10	8062759	C	T	GATA3	intron	0.58	-0.0412	0.0057	0.959637	(0.948-0.971)	-0.1373	0.0147	0.871709	(0.846-0.898)	0	1	0	Shared	CRS; Suggestive for eosinophilic asthma; seropositive rheumatoid arthritis; Type 1 diabetes	Hypoparathyroidism, sensorineural deafness, and renal dysplasia	NO	NO	NO	NO	NO
10p14	rs1444782	10	9016708	G	A	GATA3	intergenic	0.3	-0.0949	0.006	0.909464	(0.898-0.921)	-0.1994	0.0158	0.819222	(0.794-0.845)	0	1	0	Shared	Suggestive for eosinophilic asthma; Asthma-related infections; Allergic asthma; CRS; Obesity related asthma; Allergic rhinitis	Hypoparathyroidism, sensorineural deafness, and renal dysplasia	NO	YES	NO	NO	YES
10p12.31	rs11012725	10	21504895	C	T	CASC10	intergenic	0.35	0.0383	0.0059	1.03904	(1.027-1.052)	0.0133	0.0153	1.01339	(0.983-1.045)	0.9507	0.0493	0	Asthma	Paracetamol; Benign meningeoma; Cholelithiasis; Breast cancer; Lower back pain; Arthrosis; Hypertension	-	NO	NO	NO	NO	NO
10q21.2	rs10995258	10	62649027	C	T	ZNF365	intron	0.35	-0.028	0.0059	0.972388	(0.961-0.984)	-0.1089	0.0154	0.89682	(0.87-0.925)	0	0.996	0.004	Shared	IBD (+); Benign mammary dysplasia (+)	Susceptibility to uric acid nephrolithiasis	NO	NO	NO	NO	NO
10q23.33	rs2901610	10	92777107	T	C	EXOC6	intergenic	0.5	0.0291	0.0056	1.02953	(1.018-1.041)	0.0584	0.0146	1.06014	(1.03-1.091)	0.0001	0.9999	0	Shared	-	-	NO	NO	NO	NO	NO
11p15.5	rs35225972	11	1116487	G	A	MUC5AC	intergenic	0.59	0.0406	0.0059	1.04144	(1.029-1.054)	0.0331	0.0152	1.03365	(1.003-1.065)	0.2673	0.7327	0	Unassigned	Bacterial pneumonia (-)	-	NO	NO	NO	NO	NO
11q12.2	rs174537	11	61785208	G	T	MYRF/TMEM258	intron/non-coding exon	0.41	-0.0366	0.0058	0.964062	(0.953-0.976)	-0.0996	0.0151	0.905199	(0.878-0.933)	0	1	0	Shared	Statin medication; Height; Cholelithiasis (+); Venous thromboembolism; Benign neoplasm of colon; DVT; Hypercholesterolemia; Intrahepatic Cholestasis of Pregnancy; Type 2 Diabetes; IBD (+) ; Dermatitis and eczema (+)	MYRF: Mild encephalitis/encephalopathy with reversible myelin vacuolization; Cardiac-urogenital syndrome	NO	NO	NO	NO	NO
11q13.1	rs10791824	11	65791795	A	G	OVOL1	intron	0.63	0.0402	0.0058	1.04102	(1.029-1.053)	0.0468	0.0151	1.04791	(1.017-1.08)	0.0105	0.9895	0	Shared	Atopic dermatitis; Childhood allergy	-	YES	YES	YES	NO	NO
11q13.3	rs12279397	11	70148953	A	G	ANO1	intron	0.51	-0.0005	0.0057	0.9995	(0.988-1.011)	0.0904	0.0147	1.09461	(1.063-1.127)	0	0	1	CRSwNP	-	Moyamoya disease; Intestinal dysmotility syndrome	NO	NO	#N/A	NO	#N/A
11q13.5	rs7936312	11	76582682	G	T	EMSY	intergenic	0.42	0.0633	0.0056	1.06535	(1.053-1.078)	0.0624	0.0147	1.06439	(1.034-1.096)	0.0054	0.9946	0	Shared	Atopic dermatitis; IBD; Allergic rhinitis; Allergic conjunctivitis; Allergic asthma; Childhood asthma; Asthma-related infections; Autoimmune diseases excluding thyroid diseases	-	YES	YES	YES	YES	YES
11q23.3	rs12365699	11	118872577	G	A	CXCR5	intergenic	0.16	-0.0326	0.0077	0.967926	(0.953-0.983)	0.1167	0.0193	1.12378	(1.082-1.168)	0.0001	0	0.9999	CRSwNP	Allergic conjunctivitis (-); Follicular lymphoma	-	NO	YES	#N/A	NO	#N/A
11q24.3	rs73018933	11	128304886	G	A	ETS1	intergenic	0.25	-0.0412	0.0067	0.959637	(0.947-0.973)	-0.0768	0.0174	0.926075	(0.895-0.959)	0	1	0	Shared	Atopic dermatitis	-	YES	NO	NO	NO	NO
12q13.11	rs11168249	12	47814585	T	C	HDAC7	intron	0.51	-0.0364	0.0056	0.964255	(0.953-0.975)	-0.0825	0.0147	0.920811	(0.894-0.948)	0	1	0	Shared	Varicose veins (+); Asthma-related acute respiratory infections; Allergic asthma	-	NO	YES	NO	NO	YES
12q13.2	rs61938962	12	56052982	C	T	RPS26	intergenic	0.32	0.0411	0.0059	1.04196	(1.029-1.055)	0.1226	0.0153	1.13043	(1.097-1.165)	0	1	0	Shared	Hypothyroidism; T1DM; Autoimmune diseases; Basal cell carcinoma (-)	Diamond-Blackfan anemia 10	NO	NO	NO	YES	NO
12q13.3	rs167769	12	57109992	C	T	STAT6	5' UTR	0.42	0.0471	0.0057	1.04823	(1.036-1.061)	0.0788	0.0148	1.08199	(1.051-1.114)	0	1	0	Shared	Migraine (-); Height (-); Allergic asthma	Hyper-IgE syndrome 6 with recurrent infections	NO	YES	NO	NO	NO
12q21.1	rs17226898	12	71191963	T	C	TSPAN8	intron	0.32	-0.0354	0.006	0.965219	(0.953-0.977)	-0.0176	0.0156	0.982554	(0.952-1.014)	0.7659	0.2341	0	Unassigned	Type 2 diabetes (+); Asthma-related acute respiratory infections	-	NO	NO	NO	NO	YES
12q22	rs2361359	12	94169099	C	G	PLXNC1	intron	0.89	0.0504	0.0087	1.05169	(1.033-1.07)	0.0461	0.0225	1.04718	(1.002-1.095)	0.1513	0.8487	0	Unassigned	Dermatitis and eczema	-	NO	NO	NO	NO	NO
12q24.31	rs17884869	12	123034565	G	A	PITPNM2	missense	0.036	0.0832	0.0156	1.08676	(1.054-1.121)	0.0301	0.0415	1.03056	(0.95-1.118)	0.8773	0.1226	0.0001	Unassigned	-	-	NO	NO	NO	NO	NO
13q14.11	rs11618582	13	39794307	A	G	COG6	downstream	0.34	-0.0425	0.0059	0.95839	(0.947-0.97)	-0.105	0.0155	0.900325	(0.873-0.929)	0	1	0	Shared	Rheumatoid arthritis; Autoimmune diseases excluding thyroid diseases; Varicose veins (+)	Shaheen syndrome (syndromic intellectual disability); Congenital disorder of glycosylation type III	NO	NO	NO	YES	NO
13q14.11	rs7327510	13	42414788	A	G	AKAP11	intron	0.38	-0.0087	0.0058	0.991338	(0.98-1.003)	-0.1072	0.015	0.898346	(0.872-0.926)	0	0.0002	0.9998	CRSwNP	Oral lichen ruber planus; Lichen planus; Hypothyroidism; Autoimmune diseases	-	NO	NO	#N/A	YES	#N/A
13q32.3	rs1923897	13	99352087	T	C	UBAC2	intron	0.61	0.0481	0.0059	1.04928	(1.037-1.062)	0.0873	0.0153	1.09122	(1.058-1.125)	0	1	0	Shared	-	-	NO	NO	NO	NO	NO
14q23.3	rs1957949	14	65075889	C	T	MAX	3' UTR	0.42	0.028	0.0057	1.0284	(1.016-1.04)	0.0457	0.0147	1.04676	(1.017-1.078)	0.0029	0.9971	0	Shared	Height (-); Asthma-related infections	Polydactyly-macrocephaly syndrome; Susceptibility to pheochromocytoma	NO	NO	NO	NO	YES
14q24.1	rs11158728	14	68295488	G	T	RAD51B	intron	0.61	-0.0353	0.0058	0.965316	(0.954-0.977)	-0.0519	0.015	0.949424	(0.921-0.978)	0.0014	0.9986	0	Shared	Wet age-related macular degeneration (+); Childhood asthma (-); Height (+); Autoimmune diseases (+); Atopic dermatitis (-); Hypothyroidism (+)	-	YES	NO	YES	YES	NO
14q32.12	rs9323880	14	92663465	C	T	RIN3	intron	0.33	-0.0358	0.006	0.964833	(0.953-0.977)	-0.0163	0.0154	0.983832	(0.954-1.014)	0.823	0.177	0	Unassigned	Dermatitis and eczema	-	NO	NO	NO	NO	NO
15q15.1	rs16971598	15	41190033	T	C	EXD1	synonymous	0.095	-0.0642	0.0109	0.937817	(0.917-0.959)	-0.093	0.0279	0.911194	(0.862-0.963)	0.0017	0.9983	0	Shared	Sarcoidosis; Asthma-related infections	-	NO	NO	NO	NO	YES
15q22.2	rs7173981	15	60778755	T	C	RORA	intron	0.2	-0.0668	0.0074	0.935382	(0.921-0.95)	-0.0457	0.0188	0.955329	(0.92-0.992)	0.8659	0.1341	0	Unassigned	Allergic asthma; Allergic rhinitis; CRS; Atopic dermatitis	Intellectual developmental disorder with or without epilepsy or cerebellar ataxia	YES	YES	NO	NO	NO
15q22.33	rs56062135	15	67163292	C	T	SMAD3	intron	0.26	0.0917	0.0064	1.09604	(1.082-1.11)	0.093	0.0165	1.09746	(1.062-1.134)	0.0001	0.9999	0	Shared	Allergic asthma; Malignant thyroid gland; Papillary thyroid adenocarcinoma; Suggestive for eosinophilic asthma; Asthma-related infections; Coronary atherosclerosis (-); Childhood asthma; Hemorroids; Allergic rhinitis	Loeys-Dietz syndrome (connective tissue disorder)	NO	YES	YES	NO	YES
15q25.3	rs12916001	15	85702038	G	A	AKAP13	intron	0.28	-0.0339	0.0062	0.966668	(0.954-0.979)	-0.0575	0.0162	0.944122	(0.914-0.975)	0.0009	0.9991	0	Shared	Height (+); Falls/tendency to fall (-); Other/unspecified hearing loss (-)	-	NO	NO	NO	NO	NO
16p13.13	rs12935657	16	11125184	G	A	CLEC16A	intron	0.21	-0.0684	0.0068	0.933887	(0.921-0.947)	-0.1429	0.018	0.866841	(0.836-0.898)	0	1	0	Shared	Allergic asthma; Type 1 diabetes; Suggestive for eosinophilic asthma; Dermatitis and eczema; Asthma-related infections; Childhood asthma; Allergic conjunctivitis	-	YES	YES	YES	NO	YES
16p12.1	rs3024619	16	27353485	G	A	IL4R	intron	0.33	0.0565	0.0059	1.05813	(1.045-1.071)	0.0883	0.0153	1.09232	(1.06-1.126)	0	1	0	Shared	Allergic asthma; Childhood asthma	-	NO	YES	YES	NO	NO
16p11.2	rs12716974	16	29933511	G	A	KCTD13	downstream	0.5	0.0282	0.0056	1.0286	(1.017-1.04)	0.0481	0.0146	1.04928	(1.019-1.08)	0.0019	0.9981	0	Shared	Weight; BMI; Height; CRS; Arthropathies; Obesity-related asthma; Intervertebral disc disorders; Asthma-related infections; Obesity	-	NO	NO	NO	NO	YES
16p11.2	rs7184567	16	31009757	C	T	STX1B	intron	0.39	0.0288	0.0057	1.02922	(1.017-1.041)	0.0716	0.0149	1.07423	(1.043-1.107)	0	1	0	Shared	CRS; Weight; BMI; Childhood asthma; Carpal tunnel syndrome	Generalized epilepsy with febrile seizures plus, type 9	NO	NO	YES	NO	NO
16q21	rs11645550	16	60633363	A	C	RP11-457D20.2	intergenic	0.51	-0.0239	0.0056	0.976383	(0.965-0.988)	-0.0354	0.0146	0.965219	(0.937-0.994)	0.0202	0.9797	0.0001	Shared	Other diseases of intestines; Other joint disorders; Paracetamol; Depression; COPD-related respiratory insufficiency	-	NO	NO	NO	NO	NO
16q22.1	rs1728797	16	68537086	A	T	ZFP90	intron	0.81	0.0216	0.007	1.02183	(1.007-1.036)	0.1023	0.0186	1.10772	(1.068-1.149)	0	0.8244	0.1756	Unassigned	-	-	NO	NO	NO	NO	NO
16q24.3	rs2437956	16	89649843	T	C	CHMP1A	intron	0.58	0.0292	0.0058	1.02963	(1.017-1.042)	0.0516	0.0151	1.05295	(1.022-1.085)	0.0006	0.9993	0.0001	Shared	Actinic keratosis (-); Basal cell carcinoma (-); Squamous cell carcinoma (-); Malignant melanoma (-); Diabetes with complications; Type 2 diabetes; Venous thromboembolism; Autoimmune diseases	Pontocerebellar hypoplasia	NO	NO	NO	YES	NO
17p13.3	rs7222858	17	1580323	T	C	SLC43A2	intron	0.42	0.0341	0.0061	1.03469	(1.022-1.048)	0.0108	0.0158	1.01086	(0.98-1.043)	0.8857	0.1143	0	Unassigned	-	-	NO	NO	NO	NO	NO
17p13.2	rs34210653	17	4632019	A	G	ALOX15	missense	0.0071	-0.0828	0.0254	0.920535	(0.875-0.968)	-1.1078	0.1056	0.330285	(0.268-0.407)	0	0	1	CRSwNP	Suggestive for eosinophilic asthma	-	NO	NO	#N/A	NO	#N/A
17p12	rs62073587	17	16025689	C	A	TTC19	intron	0.52	0.0317	0.0056	1.03221	(1.02-1.044)	0.0691	0.0146	1.07154	(1.041-1.103)	0	1	0	Shared	Asthma and allergy; Asthma-related pneumonia	Mitochondrial complex III deficiency, nuclear type 2	NO	YES	NO	NO	NO
17q21.1	rs1011082	17	39912261	T	C	GSDMB	intron	0.45	0.0751	0.0056	1.07799	(1.066-1.09)	0.0719	0.0146	1.07455	(1.044-1.106)	0.0032	0.9968	0	Shared	Childhood asthma; Asthma-related infections; Allergic asthma; Autoimmune diseases excluding thyroid diseases (-); IBD (-); HSIL in pap smear; Cardiac arrhytmias; Atrial fibrillation and flutter; Cholelithiasis	-	NO	YES	YES	YES	YES
17q21.2	rs16967637	17	42294404	C	A	STAT5A	intron	0.24	-0.0418	0.0064	0.959062	(0.947-0.972)	-0.0384	0.0167	0.962328	(0.931-0.995)	0.1219	0.8781	0	Unassigned	Autoimmune diseases; Hypothyroidism; Type 1 diabetes; Deviated nasal septum	- (STAT3: Hyper-IgE syndrome)	NO	NO	NO	YES	NO
17q21.31	rs4247364	17	45259320	G	C	SPATA32	intron	0.68	-0.0355	0.006	0.965123	(0.953-0.977)	0.0047	0.0157	1.00471	(0.974-1.037)	0.9953	0.0047	0	Asthma	Asthma and allergy	MAP3K14: Immunodeficiency 112	NO	YES	NO	NO	NO
17q21.32	rs41444548	17	47733988	C	G	TBX21	intron	0.068	0.0612	0.0107	1.06311	(1.041-1.086)	0.1521	0.0272	1.16428	(1.103-1.229)	0	1	0	Shared	Hypothyroidism (-); Autoimmune diseases (-); Suggestive for eosinophilic asthma; Psoriasis vulgaris (-)	Asthma and nasal polyps; Immunodeficiency 88; Susceptibility to aspirin-induced asthma	NO	NO	NO	YES	NO
17q21.33	rs12952581	17	49370984	G	A	ZNF652	intron	0.42	0.0612	0.0057	1.06311	(1.051-1.076)	0.0495	0.0148	1.05075	(1.02-1.082)	0.3938	0.6062	0	Unassigned	Atopic dermatitis; Allergic asthma; Height (-); Hypertension; Asthma-related infections; Childhood asthma; Ischaemic heart disease; Depression; Hypothyroidism	-	YES	YES	YES	NO	YES
17q25.1	rs112503011	17	75800536	A	C	UNK	intron	0.086	0.0558	0.009	1.05739	(1.038-1.077)	-0.0145	0.0242	0.985605	(0.939-1.034)	0.9994	0.0006	0	Asthma	Dermatitis and eczema; Hypothyroidism; Asthma-related infections; Autoimmune diseases; Non-allergic asthma	-	NO	NO	NO	YES	YES
18q21.33	rs12457700	18	63193013	T	C	BCL2	intron	0.65	-0.0339	0.0061	0.966668	(0.955-0.979)	-0.0338	0.0157	0.966765	(0.937-0.997)	0.0846	0.9154	0	Shared	Hernia of abdominal wall; Asthma-related infections	Leukemia/lymphoma	NO	NO	NO	NO	YES
18q22.2	rs8099412	18	69869381	T	C	CD226	intron	0.44	-0.0299	0.0056	0.970543	(0.959-0.982)	-0.0651	0.0146	0.936974	(0.91-0.965)	0	1	0	Shared	Autoimmune diseases; Hypothyroidism; Type 1 diabetes; Systemic connective tissue disorders	-	NO	NO	NO	YES	NO
19p13.3	rs4147909	19	1044329	C	T	ABCA7	intron	0.29	-0.0317	0.0063	0.968797	(0.956-0.981)	-0.0812	0.0165	0.922009	(0.892-0.953)	0	0.9999	0.0001	Shared	-	Susceptibility to alzheimer's disease	NO	NO	NO	NO	NO
19q13.11	rs117710327	19	33235672	C	A	SLC7A10	TF binding site	0.099	-0.0985	0.0105	0.906196	(0.887-0.926)	-0.1462	0.0272	0.863985	(0.819-0.912)	0	1	0	Shared	Dermatitis and eczema; Suggestive for eosinophilic asthma; Atopic dermatitis; Asthma-related infections; Allergic asthma; Obesity-related asthma; Stomach adenocarcinoma (+),	-	YES	YES	NO	NO	YES
19q13.2	rs338593	19	41198399	T	C	CYP2S1	intron	0.57	-0.0114	0.0058	0.988665	(0.977-1)	-0.1404	0.0147	0.869011	(0.844-0.895)	0	0	1	CRSwNP	CRS	-	NO	NO	#N/A	NO	#N/A
19q13.32	rs1132645	19	45816157	G	C	SYMPK	synonymous	0.3	-0.0348	0.0063	0.965799	(0.953-0.978)	0.0154	0.0163	1.01552	(0.983-1.049)	0.9967	0.0033	0	Asthma	Asthma-related infections	-	NO	NO	NO	NO	YES
20q11.21	rs6119231	20	32276789	G	A	KIF3B	upstream	0.15	0.0447	0.0076	1.04571	(1.03-1.062)	0.0032	0.0201	1.00321	(0.964-1.044)	0.9833	0.0167	0	Asthma	Hypertension	Retinitis pigmentosa 89	NO	NO	NO	NO	NO
20q13.33	rs3787089	20	63685277	C	T	RTEL1	intron	0.74	0.0337	0.0062	1.03427	(1.021-1.047)	0.0052	0.0162	1.00521	(0.973-1.038)	0.9413	0.0587	0	Asthma	Atopic dermatitis; IBD; Peritonsillar abscess; Conjunctivitis	Dyskeratosis congenita; Pulmonary fibrosis and/or bone marrow failure syndrome, telomere-related	YES	YES	NO	NO	NO
21q22.12	rs8129030	21	35340290	T	A	RUNX1	intron	0.65	0.0371	0.0059	1.0378	(1.025-1.05)	0.0876	0.0154	1.09155	(1.059-1.126)	0	1	0	Shared	Rheumatoid arthritis	-	NO	NO	NO	NO	NO
22q11.21	rs1978060	22	19762002	A	G	TBX1	intron	0.64	0.0002	0.006	1.0002	(0.988-1.013)	0.1153	0.0155	1.12221	(1.088-1.157)	0	0	1	CRSwNP	Nonsuppurative otitis media; Suppurative and unspecified otitis media; CRS	Tetralogy of fallot; DiGeorge syndrome; Conotruncal anomaly face syndrome	NO	NO	#N/A	NO	#N/A
22q12.3	rs228953	22	37135396	G	A	IL2RB	synonymous	0.5	-0.0362	0.0057	0.964447	(0.953-0.976)	-0.1026	0.0147	0.902488	(0.876-0.929)	0	1	0	Shared	-	Immunodeficiency 63 with lymphoproliferation and autoimmunity	NO	NO	NO	NO	NO
22q13.31	rs4823863	22	46597553	G	A	GRAMD4	intron	0.35	0.0354	0.0061	1.03603	(1.023-1.049)	0.0236	0.0158	1.02388	(0.992-1.057)	0.4829	0.5171	0	Unassigned	-	-	NO	NO	NO	NO	NO

## Sheet: Supplementary Data 6
PHENOTYPE	GENE	CHR	START	STOP	NSNPS	NPARAM	N	DATASETS	ZSTAT	P
ASTHMA	3554	2	102069638	102179874	583	61	363535	1	8.6459	2.6702e-18
ASTHMA	8808	2	102186157	102240002	343	28	363535	1	6.2931	1.5557e-10
ASTHMA	9173	2	102311502	102352366	259	24	363535	1	6.854	3.5906e-12
ASTHMA	8809	2	102356283	102398777	220	30	363535	1	7.1196	5.4123e-13
ASTHMA	8807	2	102418558	102452568	207	29	363535	1	6.1094	5e-10
ASTHMA	ENSG00000115594	2	102681004	102796334	332	29	390032	1	7.8267	2.5044e-15
ASTHMA	ENSG00000115598	2	102803433	102856462	208	13	391782	1	5.4837	2.0825e-08
ASTHMA	ENSG00000115602	2	102927962	102968497	152	14	389824	1	7.5965	1.521e-14
ASTHMA	ENSG00000115604	2	102927989	103015218	329	17	390966	1	7.7281	5.4581e-15
ASTHMA	ENSG00000115607	2	103035149	103069025	137	14	392621	1	6.1094	5e-10
ASTHMA	10018	2	111120618	111168445	144	34	363535	1	6.1094	5e-10
ASTHMA	101927260	2	111221749	111248237	98	32	363535	1	5.0082	2.7465e-07
ASTHMA	728294	2	241734579	241768816	214	42	363535	1	6.1094	5e-10
ASTHMA	ENSG00000180902	2	242673994	242708231	143	18	387007	1	7.6063	1.41e-14
ASTHMA	ENSG00000154252	2	242716240	242743623	69	11	388849	1	4.9724	3.3061e-07
ASTHMA	60678	3	128153457	128426193	879	48	363535	1	5.2032	9.7945e-08
ASTHMA	ENSG00000145012	3	187871072	188608460	1897	201	388487	1	6.6088	1.9371e-11
ASTHMA	4026	3	188152143	188890671	3164	322	363535	1	4.9787	3.2003e-07
ASTHMA	ENSG00000138688	4	123073488	123283913	291	24	392512	1	7.8685	1.7943e-15
ASTHMA	ENSG00000164113	4	123300121	123350957	99	15	392798	1	7.3666	8.7486e-14
ASTHMA	ENSG00000109471	4	123372625	123377880	6	3	392984	1	6.0188	8.7882e-10
ASTHMA	ENSG00000138684	4	123533783	123542224	17	6	391907	1	6.1517	3.8333e-10
ASTHMA	133688	5	35953089	36001045	171	33	363535	1	5.249	7.6446e-08
ASTHMA	ENSG00000145777	5	110405760	110413722	13	5	391851	1	7.6197	1.2712e-14
ASTHMA	ENSG00000134987	5	110427414	110466200	96	11	392292	1	7.7325	5.2736e-15
ASTHMA	85480	5	111070080	111078024	25	13	363535	1	7.1758	3.5955e-13
ASTHMA	134430	5	111092172	111130502	167	30	363535	1	6.956	1.7499e-12
ASTHMA	814	5	111224249	111494886	1123	80	363535	1	8.9067	2.6291e-19
ASTHMA	56990	5	131264009	131394690	383	46	363535	1	6.0539	7.0711e-10
ASTHMA	51735	5	131423921	131635236	543	35	363535	1	6.0726	6.2909e-10
ASTHMA	ENSG00000072682	5	131527531	131631008	244	28	391005	1	5.3027	5.705e-08
ASTHMA	ENSG00000131435	5	131593364	131609147	45	8	392682	1	5.0133	2.6751e-07
ASTHMA	ENSG00000197536	5	131746328	131811736	179	18	391908	1	6.1393	4.1431e-10
ASTHMA	ENSG00000113525	5	131877136	131892530	12	2	391669	1	7.6691	8.6597e-15
ASTHMA	ENSG00000113522	5	131891711	131980313	100	6	391655	1	7.8865	1.5543e-15
ASTHMA	ENSG00000169194	5	131991955	131996802	8	2	390717	1	7.7907	3.3307e-15
ASTHMA	1437	5	132073792	132076170	7	4	363535	1	8.0766	3.3307e-16
ASTHMA	8974	5	132192009	132227863	131	35	363535	1	6.1094	5e-10
ASTHMA	8572	5	132257658	132273454	70	17	363535	1	7.4084	6.3893e-14
ASTHMA	6583	5	132294384	132344206	214	30	363535	1	6.9507	1.8172e-12
ASTHMA	6584	5	132369704	132395614	143	24	363535	1	7.2764	1.7136e-13
ASTHMA	3659	5	132481609	132490777	56	6	363535	1	7.6261	1.2101e-14
ASTHMA	105379200	5	132495146	132497253	8	3	363535	1	7.7866	3.4417e-15
ASTHMA	3567	5	132541444	132556890	25	10	363535	1	6.5595	2.7002e-11
ASTHMA	10111	5	132556924	132644621	240	40	363535	1	6.1094	5e-10
ASTHMA	3596	5	132658173	132661109	10	3	363535	1	7.8298	2.4425e-15
ASTHMA	3565	5	132673986	132682678	29	8	363535	1	7.4014	6.7391e-14
ASTHMA	11127	5	132689161	132737633	170	23	363535	1	7.2655	1.858e-13
ASTHMA	645121	5	132747411	132756255	15	6	363535	1	7.7496	4.6074e-15
ASTHMA	23176	5	132750817	132778284	77	13	363535	1	6.1094	5e-10
ASTHMA	ENSG00000131507	5	141488070	141534005	165	14	392518	1	4.9465	3.7778e-07
ASTHMA	80762	5	142108759	142154443	212	24	363535	1	4.9401	3.9033e-07
ASTHMA	84651	5	148312427	148315919	23	8	363535	1	4.9974	2.9047e-07
ASTHMA	81545	5	148383935	148442836	192	39	363535	1	5.9978	1e-09
ASTHMA	10475	6	25962689	25987329	97	33	363535	1	6.9226	2.2167e-12
ASTHMA	8359	6	26021679	26022050	3	2	363535	1	5.0511	2.1964e-07
ASTHMA	3077	6	26087281	26096117	38	19	363535	1	5.5817	1.1906e-08
ASTHMA	10385	6	26382886	26394874	76	21	363535	1	5.2985	5.8394e-08
ASTHMA	85236	6	27138293	27146858	26	14	363535	1	5.0859	1.8299e-07
ASTHMA	7746	6	28212665	28233487	100	30	363535	1	5.6134	9.9174e-09
ASTHMA	64288	6	28312837	28354506	199	37	363535	1	5.0595	2.1015e-07
ASTHMA	80317	6	28349913	28369177	93	23	363535	1	4.9727	3.3011e-07
ASTHMA	5987	6	28903002	28923991	96	26	363535	1	6.0717	6.3262e-10
ASTHMA	282890	6	28994785	29005628	44	14	363535	1	5.3484	4.4362e-08
ASTHMA	105375003	6	29108630	29114417	31	11	363535	1	5.1966	1.0151e-07
ASTHMA	26707	6	29173534	29174574	11	4	363535	1	5.4742	2.1976e-08
ASTHMA	81797	6	29373423	29375291	14	7	363535	1	5.8787	2.0669e-09
ASTHMA	11074	6	30102892	30113090	100	29	363535	1	5.8124	3.0797e-09
ASTHMA	7726	6	30184453	30213494	179	34	363535	1	6.9124	2.3824e-12
ASTHMA	202658	6	30329311	30346858	88	19	363535	1	5.3015	5.742e-08
ASTHMA	79897	6	30345129	30346858	16	7	363535	1	5.9685	1.1975e-09
ASTHMA	3133	6	30489406	30494205	13	7	363535	1	6.1228	4.5982e-10
ASTHMA	203068	6	30720201	30725426	31	10	363535	1	4.9595	3.5339e-07
ASTHMA	389376	6	30931350	30932175	10	4	363535	1	5.8037	3.2434e-09
ASTHMA	135656	6	30941000	30954221	48	20	363535	1	6.1987	2.8461e-10
ASTHMA	100507679	6	31005952	31035570	455	41	363535	1	5.8619	2.2886e-09
ASTHMA	ENSG00000204536	6	31110216	31126015	146	20	393435	1	5.0496	2.2133e-07
ASTHMA	29113	6	31111223	31112555	20	6	363535	1	5.4828	2.0935e-08
ASTHMA	170679	6	31114831	31140092	376	37	363535	1	6.7511	7.3344e-12
ASTHMA	1041	6	31115088	31120475	91	12	363535	1	6.1066	5.0877e-10
ASTHMA	ENSG00000137310	6	31126319	31134936	32	8	385848	1	5.9673	1.2061e-09
ASTHMA	170680	6	31137534	31139350	25	13	363535	1	6.6271	1.7119e-11
ASTHMA	54535	6	31142439	31158238	183	28	363535	1	6.9285	2.1269e-12
ASTHMA	6941	6	31158526	31164215	40	9	363535	1	8.2924	5.5511e-17
ASTHMA	5460	6	31164337	31170693	64	13	363535	1	6.1094	5e-10
ASTHMA	ENSG00000234745	6	31321649	31324965	61	17	389483	1	6.1094	5e-10
ASTHMA	3106	6	31353868	31357212	12	5	363535	1	7.5111	2.931e-14
ASTHMA	100507436	6	31399784	31415315	267	34	363535	1	7.3778	8.0478e-14
ASTHMA	4277	6	31494277	31511124	242	29	363535	1	7.6785	8.0491e-15
ASTHMA	401250	6	31528962	31530231	22	7	363535	1	7.0364	9.8654e-13
ASTHMA	7919	6	31530219	31542475	95	26	363535	1	8.027	4.996e-16
ASTHMA	534	6	31544451	31546848	15	10	363535	1	6.1094	5e-10
ASTHMA	4795	6	31546851	31558829	77	23	363535	1	6.9398	1.9637e-12
ASTHMA	4049	6	31560550	31574324	69	18	363535	1	5.6877	6.4366e-09
ASTHMA	7940	6	31586179	31588909	17	11	363535	1	7.7048	6.5503e-15
ASTHMA	ENSG00000204469	6	31588497	31605548	55	13	393120	1	5.3622	4.1109e-08
ASTHMA	259197	6	31588883	31593019	30	15	363535	1	6.9243	2.1913e-12
ASTHMA	ENSG00000204463	6	31606805	31620482	37	11	393569	1	7.2997	1.4422e-13
ASTHMA	199	6	31615192	31617021	9	4	363535	1	5.9656	1.219e-09
ASTHMA	ENSG00000204444	6	31620193	31625987	4	2	393409	1	6.2599	1.9263e-10
ASTHMA	7916	6	31620673	31637777	102	32	363535	1	6.0423	7.5964e-10
ASTHMA	ENSG00000204435	6	31633013	31638120	16	7	393227	1	5.0538	2.1658e-07
ASTHMA	ENSG00000263020	6	31633879	31641323	11	5	393082	1	5.4428	2.6219e-08
ASTHMA	7917	6	31639028	31660767	101	38	363535	1	6.1094	5e-10
ASTHMA	55937	6	31652410	31658210	27	14	363535	1	6.7359	8.144e-12
ASTHMA	ENSG00000204422	6	31654739	31681849	39	11	393352	1	5.2479	7.6922e-08
ASTHMA	7918	6	31661229	31666283	30	13	363535	1	7.5856	1.6542e-14
ASTHMA	1460	6	31665880	31670070	16	8	363535	1	7.4317	5.3624e-14
ASTHMA	58496	6	31670951	31672450	9	5	363535	1	6.4791	4.6142e-11
ASTHMA	ENSG00000250641	6	31674681	31685695	10	4	393463	1	5.6896	6.3658e-09
ASTHMA	7920	6	31686949	31703360	62	24	363535	1	7.4897	3.4528e-14
ASTHMA	ENSG00000213722	6	31694815	31698394	4	2	393493	1	5.0884	1.8058e-07
ASTHMA	259215	6	31706907	31710595	15	8	363535	1	7.1857	3.3434e-13
ASTHMA	80740	6	31718648	31721734	16	9	363535	1	6.486	4.4082e-11
ASTHMA	80739	6	31720808	31726710	18	12	363535	1	7.0189	1.1182e-12
ASTHMA	23564	6	31727037	31730265	18	12	363535	1	5.6378	8.6136e-09
ASTHMA	1192	6	31730581	31737318	28	18	363535	1	7.4907	3.425e-14
ASTHMA	ENSG00000204396	6	31733367	31745108	23	10	393013	1	6.9347	2.0358e-12
ASTHMA	4439	6	31739948	31762678	95	31	363535	1	8.1259	2.2204e-16
ASTHMA	401251	6	31762996	31764850	12	9	363535	1	6.6125	1.8896e-11
ASTHMA	80737	6	31765401	31777331	53	21	363535	1	7.8698	1.7764e-15
ASTHMA	7407	6	31777518	31795935	61	30	363535	1	7.8516	2.0539e-15
ASTHMA	ENSG00000204388	6	31795512	31798031	6	4	391898	1	4.9946	2.9486e-07
ASTHMA	57819	6	31797392	31806984	39	20	363535	1	7.7995	3.1086e-15
ASTHMA	3305	6	31809619	31821999	49	26	363535	1	5.5049	1.8465e-08
ASTHMA	3304	6	31827735	31830254	7	5	363535	1	6.8756	3.0858e-12
ASTHMA	50854	6	31834915	31839766	26	15	363535	1	8.2095	1.1102e-16
ASTHMA	ENSG00000204371	6	31847536	31865464	21	9	393535	1	5.9225	1.5857e-09
ASTHMA	80736	6	31863192	31879046	86	21	363535	1	6.9493	1.836e-12
ASTHMA	10919	6	31879759	31897707	81	37	363535	1	7.587	1.6376e-14
ASTHMA	717	6	31897785	31945674	194	49	363535	1	5.6997	6e-09
ASTHMA	629	6	31945944	31952084	33	18	363535	1	7.5579	2.0484e-14
ASTHMA	7936	6	31952087	31959087	28	14	363535	1	7.8516	2.0539e-15
ASTHMA	6499	6	31958804	31969755	54	23	363535	1	6.0969	5.4061e-10
ASTHMA	1797	6	31969811	31972290	18	12	363535	1	5.9974	1.0028e-09
ASTHMA	8859	6	31971175	31981446	49	21	363535	1	6.7391	7.968e-12
ASTHMA	1589	6	32038316	32041670	37	20	363535	1	6.1094	5e-10
ASTHMA	7148	6	32041155	32109374	288	57	363535	1	7.5713	1.847e-14
ASTHMA	ENSG00000258388	6	32121622	32139755	8	5	393507	1	7.1127	5.6904e-13
ASTHMA	ENSG00000204310	6	32135989	32145873	18	7	393500	1	6.3834	8.6622e-11
ASTHMA	80863	6	32148363	32151943	4	2	363535	1	6.8983	2.6318e-12
ASTHMA	9374	6	32153452	32163681	37	20	363535	1	7.5865	1.6431e-14
ASTHMA	80864	6	32164605	32168285	20	10	363535	1	6.3989	7.8229e-11
ASTHMA	10554	6	32168206	32178111	28	13	363535	1	7.8088	2.8866e-15
ASTHMA	6048	6	32178385	32180793	13	5	363535	1	7.459	4.3576e-14
ASTHMA	177	6	32180968	32184322	21	12	363535	1	7.6733	8.3822e-15
ASTHMA	5089	6	32184733	32190186	19	10	363535	1	6.9548	1.7657e-12
ASTHMA	63940	6	32190766	32195523	18	10	363535	1	6.7726	6.3259e-12
ASTHMA	4855	6	32194843	32224067	192	46	363535	1	7.283	1.6326e-13
ASTHMA	101929163	6	32255717	32407822	2083	47	363535	1	8.3597	3.1451e-17
ASTHMA	ENSG00000204296	6	32256303	32339684	98	8	393393	1	5.3149	5.3353e-08
ASTHMA	10665	6	32288541	32372114	934	35	363535	1	6.5897	2.2033e-11
ASTHMA	56244	6	32393339	32408879	444	16	363535	1	7.1753	3.6087e-13
ASTHMA	3122	6	32439842	32445046	71	14	363535	1	7.4184	5.9286e-14
ASTHMA	ENSG00000198502	6	32485120	32498064	43	13	264149	1	6.1094	5e-10
ASTHMA	ENSG00000196126	6	32546546	32557625	16	6	342675	1	8.2095	1.1102e-16
ASTHMA	ENSG00000196735	6	32595956	32614839	17	3	302203	1	7.7234	5.6621e-15
ASTHMA	ENSG00000179344	6	32627244	32636160	92	14	345697	1	6.1094	5e-10
ASTHMA	3117	6	32637396	32654774	145	12	363535	1	7.5445	2.2704e-14
ASTHMA	3119	6	32659464	32666689	117	16	363535	1	6.1094	5e-10
ASTHMA	3118	6	32741386	32746887	60	11	363535	1	5.8376	2.6484e-09
ASTHMA	3120	6	32756094	32763553	58	8	363535	1	5.6844	6.5634e-09
ASTHMA	ENSG00000250264	6	32781544	32806599	3	1	393628	1	6.1094	5e-10
ASTHMA	ENSG00000204267	6	32789610	32806557	3	1	393628	1	6.1094	5e-10
ASTHMA	3112	6	32812763	32817048	42	13	363535	1	7.6303	1.1713e-14
ASTHMA	6891	6	32821833	32838823	174	32	363535	1	7.7325	5.2736e-15
ASTHMA	60468	6	89926528	90296908	1343	165	363535	1	8.1719	1.5174e-16
ASTHMA	ENSG00000112182	6	90636248	91006627	694	82	387809	1	6.6296	1.6833e-11
ASTHMA	154215	6	123803837	124825640	4429	317	363535	1	5.4786	2.1433e-08
ASTHMA	221935	7	3301448	4269000	6034	190	363535	1	5.3729	3.8731e-08
ASTHMA	3696	7	20329803	20415759	410	32	363535	1	5.0684	2.0061e-07
ASTHMA	9258	8	8783354	8893621	772	61	363535	1	4.9225	4.2717e-07
ASTHMA	79660	8	9136254	9151642	79	17	363535	1	5.3008	5.7654e-08
ASTHMA	286046	8	10896045	11201381	1664	77	363535	1	5.0115	2.7008e-07
ASTHMA	90865	9	6215149	6257983	168	29	363535	1	7.3881	7.4496e-14
ASTHMA	ENSG00000137033	9	6215805	6257983	130	18	390172	1	7.2628	1.8963e-13
ASTHMA	ENSG00000170777	9	6328349	6331900	9	3	391810	1	6.2526	2.0189e-10
ASTHMA	89882	9	6328349	6331900	21	12	363535	1	6.78	6.0095e-12
ASTHMA	ENSG00000134460	10	6052652	6104288	217	38	390836	1	5.8229	2.8925e-09
ASTHMA	ENSG00000107485	10	8095567	8117161	73	11	389051	1	5.4811	2.1129e-08
ASTHMA	10335	11	10573091	10693988	554	66	363535	1	4.9527	3.6592e-07
ASTHMA	710	11	57597554	57614853	55	12	363535	1	5.0667	2.0239e-07
ASTHMA	ENSG00000134824	11	61560452	61634826	154	17	390582	1	5.5441	1.4776e-08
ASTHMA	ENSG00000149485	11	61567099	61596790	33	4	392520	1	5.5627	1.3285e-08
ASTHMA	5970	11	65653596	65662972	27	14	363535	1	4.9429	3.8485e-07
ASTHMA	10524	11	65711996	65719606	31	10	363535	1	5.0959	1.7352e-07
ASTHMA	5017	11	65787034	65797219	42	15	363535	1	5.2321	8.3777e-08
ASTHMA	51564	12	47782722	47820612	200	50	363535	1	5.5715	1.2626e-08
ASTHMA	341416	12	55452214	55453152	3	2	363535	1	4.9701	3.3461e-07
ASTHMA	ENSG00000111540	12	56367697	56388490	36	5	391666	1	5.145	1.3376e-07
ASTHMA	ENSG00000065361	12	56473641	56497289	28	6	392015	1	4.9689	3.3661e-07
ASTHMA	ENSG00000170426	12	57316938	57328189	34	6	390213	1	5.1241	1.4949e-07
ASTHMA	ENSG00000166888	12	57489191	57525922	59	13	390254	1	7.4681	4.069e-14
ASTHMA	337867	13	99200425	99386499	758	47	363535	1	5.3311	4.8806e-08
ASTHMA	ENSG00000134882	13	99853028	100038688	405	25	391771	1	6.5951	2.1244e-11
ASTHMA	ENSG00000169508	13	99946784	99959659	24	8	391644	1	5.1387	1.3832e-07
ASTHMA	4149	14	65006101	65102695	397	55	363535	1	5.2486	7.6623e-08
ASTHMA	ENSG00000100599	14	92980118	93155339	616	75	387216	1	4.9204	4.3191e-07
ASTHMA	3706	15	41493858	41503559	40	13	363535	1	4.9796	3.1864e-07
ASTHMA	6095	15	60488284	61229303	3212	334	363535	1	7.3261	1.1844e-13
ASTHMA	4088	15	67065627	67195195	528	90	363535	1	7.0629	8.1556e-13
ASTHMA	79719	15	67200675	67255198	175	27	363535	1	4.9179	4.3749e-07
ASTHMA	ENSG00000166949	15	67356101	67487533	364	49	389473	1	7.9191	1.1962e-15
ASTHMA	ENSG00000259202	15	67435072	67439277	10	4	381184	1	5.857	2.357e-09
ASTHMA	ENSG00000103591	15	67493371	67547533	98	9	392664	1	5.7615	4.1686e-09
ASTHMA	79875	15	71115628	71783383	3159	236	363535	1	5.6663	7.296e-09
ASTHMA	23274	16	10944488	11193278	1104	61	363535	1	5.8597	2.3188e-09
ASTHMA	ENSG00000038532	16	11038345	11276046	637	26	391310	1	5.9275	1.5378e-09
ASTHMA	ENSG00000245888	16	27279526	27301813	26	5	389293	1	5.2665	6.9542e-08
ASTHMA	3566	16	27313668	27364778	248	43	363535	1	7.6551	9.6589e-15
ASTHMA	ENSG00000077238	16	27324989	27376099	149	18	390297	1	6.721	9.0228e-12
ASTHMA	50615	16	27402162	27452042	246	67	363535	1	5.8842	2e-09
ASTHMA	253982	16	29900826	29920112	44	19	363535	1	5.3419	4.6e-08
ASTHMA	253980	16	29906335	29926232	59	17	363535	1	5.9978	1e-09
ASTHMA	ENSG00000131771	17	37782993	37792879	24	5	392151	1	5.0486	2.2258e-07
ASTHMA	ENSG00000141744	17	37824234	37826728	4	2	382516	1	6.4942	4.1746e-11
ASTHMA	ENSG00000161395	17	37827375	37853050	56	4	390179	1	6.0381	7.798e-10
ASTHMA	ENSG00000141736	17	37844167	37886679	42	8	392264	1	5.9749	1.1515e-09
ASTHMA	ENSG00000141741	17	37884749	37887040	2	1	388992	1	5.4124	3.1101e-08
ASTHMA	ENSG00000186075	17	38024417	38034149	26	3	393109	1	7.7695	3.9413e-15
ASTHMA	ENSG00000073605	17	38060848	38076107	24	5	392392	1	7.2628	1.8957e-13
ASTHMA	ENSG00000172057	17	38077294	38083854	9	4	392167	1	5.2715	6.7666e-08
ASTHMA	ENSG00000167914	17	38119226	38134019	27	8	387546	1	6.585	2.2746e-11
ASTHMA	ENSG00000108344	17	38137050	38154213	36	7	390481	1	5.2112	9.3815e-08
ASTHMA	ENSG00000008838	17	38175350	38217468	78	9	388172	1	5.6598	7.5776e-09
ASTHMA	84152	17	39626208	39636625	39	13	363535	1	6.7215	8.995e-12
ASTHMA	8557	17	39665346	39666554	6	4	363535	1	6.0928	5.5464e-10
ASTHMA	5409	17	39667981	39670475	8	5	363535	1	7.3351	1.108e-13
ASTHMA	93210	17	39671122	39688070	84	8	363535	1	7.5089	2.9809e-14
ASTHMA	2064	17	39688084	39728662	121	39	363535	1	7.7887	3.3862e-15
ASTHMA	124626	17	39868164	39877896	45	8	363535	1	6.1094	5e-10
ASTHMA	55876	17	39904595	39919377	77	11	363535	1	7.6925	7.2164e-15
ASTHMA	94103	17	39921042	39927631	24	14	363535	1	6.1094	5e-10
ASTHMA	100505591	17	39927722	39945034	69	19	363535	1	7.1942	3.1408e-13
ASTHMA	284110	17	39962973	39977880	67	15	363535	1	6.1094	5e-10
ASTHMA	5709	17	39980768	39997960	79	12	363535	1	6.4837	4.4755e-11
ASTHMA	1440	17	40015361	40017813	12	4	363535	1	5.2276	8.5856e-08
ASTHMA	9862	17	40019097	40054636	107	23	363535	1	6.74	7.9201e-12
ASTHMA	ENSG00000198740	17	47366568	47439835	153	15	392267	1	5.5192	1.7026e-08
ASTHMA	ENSG00000262039	17	47448102	47554350	267	39	389008	1	4.9706	3.338e-07
ASTHMA	2793	17	49204442	49210574	29	13	363535	1	6.3201	1.3072e-10
ASTHMA	51225	17	49210227	49223225	59	19	363535	1	5.3418	4.6008e-08
ASTHMA	22834	17	49289206	49362473	227	32	363535	1	6.1094	5e-10
ASTHMA	54963	20	63939829	63959435	79	35	363535	1	6.1094	5e-10
ASTHMA	ENSG00000159216	21	36160098	37376965	3440	190	389897	1	6.4269	6.5116e-11
CRSwNP	1513	1	150796208	150808441	19	10	327627	1	5.8095	3.1334e-09
CRSwNP	405	1	150809705	150876768	144	28	327627	1	5.6557	7.759e-09
CRSwNP	9869	1	150926339	150964901	107	27	327627	1	5.3583	4.2e-08
CRSwNP	29956	1	150965173	150975003	30	9	327627	1	5.06	2.096e-07
CRSwNP	8416	1	150982023	150996063	46	15	327627	1	6.465	5.0666e-11
CRSwNP	55793	1	150996825	151008378	37	15	327627	1	5.6911	6.3116e-09
CRSwNP	109	2	24819169	24919733	484	39	327627	1	4.9546	3.6242e-07
CRSwNP	9173	2	102311502	102352366	239	25	327627	1	7.3357	1.1025e-13
CRSwNP	8809	2	102356283	102398777	214	29	327627	1	6.1094	5e-10
CRSwNP	8807	2	102418558	102452568	197	27	327627	1	6.7976	5.318e-12
CRSwNP	ENSG00000115602	2	102927962	102968497	148	13	367103	1	5.6724	7.0403e-09
CRSwNP	ENSG00000115604	2	102927989	103015218	319	22	366746	1	6.7211	9.0203e-12
CRSwNP	ENSG00000115607	2	103035149	103069025	136	14	366763	1	5.9512	1.3313e-09
CRSwNP	26058	2	232697305	232860577	572	34	327627	1	5.0384	2.3469e-07
CRSwNP	3769	2	232765802	232776565	35	10	327627	1	4.9771	3.2266e-07
CRSwNP	389084	2	232869119	232878695	39	13	327627	1	5.0064	2.7726e-07
CRSwNP	ENSG00000204120	2	233562009	233725285	364	22	366579	1	7.3312	1.1402e-13
CRSwNP	ENSG00000115474	2	233631174	233641278	24	5	367480	1	6.8013	5.1824e-12
CRSwNP	ENSG00000182600	2	233721980	233743418	51	8	367048	1	5.5467	1.4552e-08
CRSwNP	27086	3	70954714	71583989	2007	189	327627	1	6.6033	2.0105e-11
CRSwNP	ENSG00000114861	3	71003844	71633140	1166	127	364561	1	5.7111	5.6119e-09
CRSwNP	ENSG00000145777	5	110405760	110413722	13	5	366021	1	5.3849	3.6249e-08
CRSwNP	ENSG00000134987	5	110427414	110466200	98	11	366540	1	5.3528	4.3293e-08
CRSwNP	85480	5	111070080	111078024	23	11	327627	1	7.4609	4.2966e-14
CRSwNP	134430	5	111092172	111130502	155	26	327627	1	6.1094	5e-10
CRSwNP	814	5	111224249	111494886	1040	67	327627	1	8.1267	2.2053e-16
CRSwNP	56990	5	131264009	131394690	362	46	327627	1	7.2442	2.1743e-13
CRSwNP	ENSG00000164400	5	131409483	131411859	5	2	365988	1	5.0359	2.3781e-07
CRSwNP	51735	5	131423921	131635236	496	38	327627	1	6.7523	7.2777e-12
CRSwNP	ENSG00000072682	5	131527531	131631008	259	25	365601	1	6.1629	3.5708e-10
CRSwNP	96459	5	131641714	131797063	355	35	327627	1	5.6456	8.2289e-09
CRSwNP	ENSG00000197536	5	131746328	131811736	179	17	366289	1	5.5875	1.1521e-08
CRSwNP	728637	5	131806990	131945698	393	39	327627	1	5.2127	9.3048e-08
CRSwNP	23305	5	131949973	132012068	173	35	327627	1	6.1094	5e-10
CRSwNP	1437	5	132073792	132076170	7	4	327627	1	6.7694	6.4653e-12
CRSwNP	8974	5	132192009	132227863	126	33	327627	1	6.1094	5e-10
CRSwNP	8572	5	132257658	132273454	67	16	327627	1	6.0973	5.3941e-10
CRSwNP	6583	5	132294384	132344206	209	28	327627	1	5.1363	1.4007e-07
CRSwNP	6584	5	132369704	132395614	135	21	327627	1	5.5554	1.3851e-08
CRSwNP	3596	5	132658173	132661109	9	3	327627	1	5.9725	1.1683e-09
CRSwNP	645121	5	132747411	132756255	14	5	327627	1	5.4902	2.0069e-08
CRSwNP	134548	5	132813324	132816797	7	3	327627	1	5.0338	2.4046e-07
CRSwNP	ENSG00000137265	6	391739	411447	63	13	365711	1	5.6772	6.8452e-09
CRSwNP	7746	6	28212665	28233487	91	26	327627	1	4.9435	3.8374e-07
CRSwNP	282890	6	28994785	29005628	41	12	327627	1	5.3423	4.5885e-08
CRSwNP	442184	6	29086208	29087313	5	3	327627	1	5.0671	2.0201e-07
CRSwNP	105375003	6	29108630	29114417	30	11	327627	1	5.7682	4.0052e-09
CRSwNP	135656	6	30941000	30954221	42	17	327627	1	5.0358	2.3795e-07
CRSwNP	170679	6	31114831	31140092	360	35	327627	1	5.6076	1.0259e-08
CRSwNP	1041	6	31115088	31120475	90	12	327627	1	5.0685	2.005e-07
CRSwNP	ENSG00000234745	6	31321649	31324965	60	17	366574	1	5.0842	1.8462e-07
CRSwNP	7919	6	31530219	31542475	91	23	327627	1	5.3259	5.0232e-08
CRSwNP	7940	6	31586179	31588909	17	11	327627	1	5.2637	7.0608e-08
CRSwNP	ENSG00000204371	6	31847536	31865464	21	9	367596	1	5.3	5.7897e-08
CRSwNP	717	6	31897785	31945674	174	42	327627	1	5.7685	4e-09
CRSwNP	629	6	31945944	31952084	30	15	327627	1	6.3701	9.4437e-11
CRSwNP	7936	6	31952087	31959087	25	12	327627	1	6.06	6.8061e-10
CRSwNP	8859	6	31971175	31981446	41	16	327627	1	5.5079	1.816e-08
CRSwNP	1589	6	32038316	32041670	30	15	327627	1	5.8873	1.9632e-09
CRSwNP	7148	6	32041155	32109374	261	49	327627	1	6.7021	1.0269e-11
CRSwNP	1388	6	32115268	32128240	37	20	327627	1	6.8957	2.6794e-12
CRSwNP	9374	6	32153452	32163681	32	16	327627	1	5.6041	1.047e-08
CRSwNP	177	6	32180968	32184322	20	11	327627	1	5.7299	5.0242e-09
CRSwNP	4855	6	32194843	32224067	176	40	327627	1	5.2843	6.3097e-08
CRSwNP	101929163	6	32255717	32407822	1913	45	327627	1	8.2007	1.1952e-16
CRSwNP	10665	6	32288541	32372114	840	28	327627	1	6.3261	1.257e-10
CRSwNP	3122	6	32439842	32445046	71	14	327627	1	8.0988	2.7756e-16
CRSwNP	ENSG00000196126	6	32546546	32557625	5	2	364829	1	6.389	8.3511e-11
CRSwNP	ENSG00000196735	6	32595956	32614839	3	1	359797	1	5.6277	9.1334e-09
CRSwNP	ENSG00000179344	6	32627244	32636160	39	7	365002	1	7.5442	2.276e-14
CRSwNP	3117	6	32637396	32654774	143	11	327627	1	6.1094	5e-10
CRSwNP	3119	6	32659464	32666689	108	14	327627	1	6.6844	1.1596e-11
CRSwNP	3111	6	33004182	33009612	58	19	327627	1	6.4101	7.2693e-11
CRSwNP	9277	6	33279103	33289527	44	17	327627	1	5.0769	1.918e-07
CRSwNP	10471	6	33289597	33290934	3	2	327627	1	5.5383	1.5272e-08
CRSwNP	9278	6	33314405	33317942	8	5	327627	1	5.1249	1.4882e-07
CRSwNP	3710	6	33621379	33696574	402	55	327627	1	6.1018	5.2425e-10
CRSwNP	84300	6	33696761	33711751	75	11	327627	1	5.582	1.1889e-08
CRSwNP	117283	6	33721637	33746985	131	25	327627	1	5.6563	7.7357e-09
CRSwNP	60468	6	89926528	90296908	1263	132	327627	1	5.5518	1.4136e-08
CRSwNP	ENSG00000112182	6	90636248	91006627	616	81	365059	1	7.0115	1.1792e-12
CRSwNP	4982	8	118923557	118952144	140	25	327627	1	5.5704	1.2708e-08
CRSwNP	10584	8	118952240	119108455	857	37	327627	1	5.1719	1.1588e-07
CRSwNP	90865	9	6215149	6257983	159	26	327627	1	6.1094	5e-10
CRSwNP	ENSG00000137033	9	6215805	6257983	127	17	364693	1	6.4529	5.485e-11
CRSwNP	89882	9	6328349	6331900	19	10	327627	1	7.795	3.2196e-15
CRSwNP	ENSG00000170777	9	6328349	6331900	9	3	365986	1	5.5715	1.2627e-08
CRSwNP	115426	9	6413148	6507056	364	34	327627	1	5.203	9.8031e-08
CRSwNP	ENSG00000178445	9	6532464	6645650	384	50	363885	1	5.3095	5.4965e-08
CRSwNP	2731	9	6532464	6645692	610	70	327627	1	7.4707	3.9897e-14
CRSwNP	3559	10	6010694	6062370	307	56	327627	1	5.8424	2.5724e-09
CRSwNP	2625	10	8045428	8075201	148	32	327627	1	6.1094	5e-10
CRSwNP	ENSG00000107485	10	8095567	8117161	69	10	364436	1	5.6856	6.5196e-09
CRSwNP	9415	11	61816203	61867354	199	37	327627	1	5.5804	1.2e-08
CRSwNP	5869	12	55973913	55996683	68	16	327627	1	5.5129	1.7644e-08
CRSwNP	6821	12	55997259	56005525	20	13	327627	1	4.9963	2.9219e-07
CRSwNP	ENSG00000111540	12	56367697	56388490	35	5	366369	1	5.3115	5.4361e-08
CRSwNP	57511	13	39655627	39791665	476	31	327627	1	5.3285	4.9521e-08
CRSwNP	23274	16	10944488	11193278	1019	53	327627	1	5.9845	1.0851e-09
CRSwNP	ENSG00000161905	17	4534197	4545589	24	8	363080	1	5.699	6.0265e-09
CRSwNP	246	17	4630919	4641665	54	20	327627	1	5.4614	2.3625e-08
CRSwNP	94103	17	39921042	39927631	20	11	327627	1	4.9989	2.8832e-07
CRSwNP	29785	19	41193207	41207539	53	20	327627	1	6.9634	1.6604e-12
CRSwNP	3560	22	37125838	37149922	125	34	327627	1	6.3055	1.4367e-10
ASTCRS	864	1	24899511	24965157	239	67	377277	1	5.4909	2e-08
ASTCRS	79753	1	37534449	37554344	63	21	377277	1	5.0779	1.9082e-07
ASTCRS	29889	1	37566812	37595985	111	30	377277	1	5.0964	1.7311e-07
ASTCRS	ENSG00000198821	1	167399877	167487847	248	51	394382	1	5.0516	2.1905e-07
ASTCRS	3554	2	102069638	102179874	583	61	377277	1	7.8918	1.4888e-15
ASTCRS	8808	2	102186157	102240002	343	28	377277	1	6.5443	2.989e-11
ASTCRS	9173	2	102311502	102352366	259	24	377277	1	7.0543	8.6724e-13
ASTCRS	8809	2	102356283	102398777	220	30	377277	1	7.1803	3.4789e-13
ASTCRS	8807	2	102418558	102452568	207	29	377277	1	7.0643	8.0685e-13
ASTCRS	6549	2	102619689	102711350	340	58	377277	1	5.3317	4.8651e-08
ASTCRS	ENSG00000115594	2	102681004	102796334	319	33	394395	1	7.4447	4.8572e-14
ASTCRS	ENSG00000115598	2	102803433	102856462	211	12	396138	1	5.7183	5.3787e-09
ASTCRS	ENSG00000115602	2	102927962	102968497	148	13	396746	1	7.574	1.8097e-14
ASTCRS	ENSG00000115604	2	102927989	103015218	319	22	396357	1	6.1094	5e-10
ASTCRS	ENSG00000115607	2	103035149	103069025	136	14	396378	1	6.1094	5e-10
ASTCRS	10018	2	111120618	111168445	144	34	377277	1	5.6997	6e-09
ASTCRS	101927260	2	111221749	111248237	98	32	377277	1	5.127	1.4721e-07
ASTCRS	728294	2	241734579	241768816	214	42	377277	1	6.1094	5e-10
ASTCRS	ENSG00000180902	2	242673994	242708231	121	15	394031	1	6.1094	5e-10
ASTCRS	7871	3	57756221	57930003	444	52	377277	1	5.1638	1.2097e-07
ASTCRS	ENSG00000145012	3	187871072	188608460	1787	204	394725	1	7.0431	9.4024e-13
ASTCRS	4026	3	188152143	188890671	3164	322	377277	1	5.3279	4.9683e-08
ASTCRS	ENSG00000138688	4	123073488	123283913	289	31	396506	1	6.1094	5e-10
ASTCRS	ENSG00000164113	4	123300121	123350957	99	16	396532	1	7.3645	8.8929e-14
ASTCRS	ENSG00000109471	4	123372625	123377880	6	3	396720	1	6.8198	4.5577e-12
ASTCRS	ENSG00000138684	4	123533783	123542224	17	6	395630	1	6.2143	2.5783e-10
ASTCRS	133690	5	35904295	35938779	199	32	377277	1	5.0065	2.7714e-07
ASTCRS	133688	5	35953089	36001045	171	33	377277	1	5.8768	2.0919e-09
ASTCRS	642987	5	110387273	110738921	1451	52	377277	1	6.2181	2.5156e-10
ASTCRS	ENSG00000145777	5	110405760	110413722	13	5	395577	1	7.4362	5.1792e-14
ASTCRS	ENSG00000134987	5	110427414	110466200	98	11	396130	1	7.2615	1.914e-13
ASTCRS	85480	5	111070080	111078024	25	13	377277	1	6.1094	5e-10
ASTCRS	134430	5	111092172	111130502	167	30	377277	1	6.1094	5e-10
ASTCRS	814	5	111224249	111494886	1123	80	377277	1	9.3376	4.9263e-21
ASTCRS	56990	5	131264009	131394690	383	46	377277	1	6.1094	5e-10
ASTCRS	51735	5	131423921	131635236	543	35	377277	1	6.0163	8.9244e-10
ASTCRS	ENSG00000072682	5	131527531	131631008	259	25	395120	1	6.0551	7.0186e-10
ASTCRS	ENSG00000131435	5	131593364	131609147	43	7	396515	1	5.4619	2.3548e-08
ASTCRS	ENSG00000197375	5	131705444	131731306	85	9	396539	1	5.1043	1.6602e-07
ASTCRS	ENSG00000197536	5	131746328	131811736	179	17	395857	1	6.4067	7.4369e-11
ASTCRS	ENSG00000125347	5	131817301	131826490	34	2	397007	1	4.9462	3.7842e-07
ASTCRS	ENSG00000113525	5	131877136	131892530	12	2	396212	1	6.0887	5.6923e-10
ASTCRS	ENSG00000113522	5	131891711	131980313	98	5	396202	1	7.313	1.3067e-13
ASTCRS	23305	5	131949973	132012068	189	40	377277	1	5.3341	4.8e-08
ASTCRS	ENSG00000169194	5	131991955	131996802	8	2	394427	1	7.7972	3.1641e-15
ASTCRS	1437	5	132073792	132076170	7	4	377277	1	8.0577	3.8858e-16
ASTCRS	8974	5	132192009	132227863	131	35	377277	1	6.2539	2.0013e-10
ASTCRS	8572	5	132257658	132273454	70	17	377277	1	7.2748	1.7342e-13
ASTCRS	6583	5	132294384	132344206	214	30	377277	1	6.7899	5.609e-12
ASTCRS	6584	5	132369704	132395614	143	24	377277	1	6.6514	1.4512e-11
ASTCRS	3659	5	132481609	132490777	56	6	377277	1	7.3976	6.9333e-14
ASTCRS	105379200	5	132495146	132497253	8	3	377277	1	7.7846	3.4972e-15
ASTCRS	3567	5	132541444	132556890	25	10	377277	1	6.3039	1.4516e-10
ASTCRS	10111	5	132556924	132644621	240	40	377277	1	6.1094	5e-10
ASTCRS	3596	5	132658173	132661109	10	3	377277	1	6.5668	2.5696e-11
ASTCRS	3565	5	132673986	132682678	29	8	377277	1	6.8617	3.4016e-12
ASTCRS	11127	5	132689161	132737633	170	23	377277	1	6.5317	3.2505e-11
ASTCRS	645121	5	132747411	132756255	15	6	377277	1	7.9347	1.0547e-15
ASTCRS	23176	5	132750817	132778284	77	13	377277	1	7.1558	4.1606e-13
ASTCRS	ENSG00000131507	5	141488070	141534005	165	14	396769	1	5.1687	1.1786e-07
ASTCRS	80762	5	142108759	142154443	212	24	377277	1	5.7543	4.3509e-09
ASTCRS	84651	5	148312427	148315919	23	8	377277	1	5.2084	9.5263e-08
ASTCRS	643394	5	148335559	148339849	11	5	377277	1	5.168	1.1833e-07
ASTCRS	81545	5	148383935	148442836	192	39	377277	1	6.1094	5e-10
ASTCRS	10475	6	25962689	25987329	97	33	377277	1	5.3818	3.6869e-08
ASTCRS	7746	6	28212665	28233487	100	30	377277	1	5.5799	1.2031e-08
ASTCRS	5987	6	28903002	28923991	96	26	377277	1	5.8676	2.2105e-09
ASTCRS	282890	6	28994785	29005628	44	14	377277	1	5.1984	1.0052e-07
ASTCRS	26707	6	29173534	29174574	11	4	377277	1	5.3689	3.9614e-08
ASTCRS	11074	6	30102892	30113090	100	29	377277	1	5.0873	1.8159e-07
ASTCRS	7726	6	30184453	30213494	179	34	377277	1	6.0113	9.2035e-10
ASTCRS	3133	6	30489406	30494205	13	7	377277	1	4.9459	3.7889e-07
ASTCRS	389376	6	30931350	30932175	10	4	377277	1	5.3339	4.806e-08
ASTCRS	135656	6	30941000	30954221	48	20	377277	1	5.4779	2.1517e-08
ASTCRS	100507679	6	31005952	31035570	455	41	377277	1	5.6558	7.7539e-09
ASTCRS	170679	6	31114831	31140092	376	37	377277	1	6.4782	4.641e-11
ASTCRS	1041	6	31115088	31120475	91	12	377277	1	6.0751	6.1953e-10
ASTCRS	ENSG00000137310	6	31126319	31134936	31	7	397364	1	5.0576	2.1223e-07
ASTCRS	54535	6	31142439	31158238	183	28	377277	1	5.5529	1.4046e-08
ASTCRS	6941	6	31158526	31164215	40	9	377277	1	7.6944	7.1054e-15
ASTCRS	5460	6	31164337	31170693	64	13	377277	1	6.9009	2.583e-12
ASTCRS	ENSG00000234745	6	31321649	31324965	60	17	396175	1	7.3035	1.4017e-13
ASTCRS	3106	6	31353868	31357212	12	5	377277	1	6.0729	6.2822e-10
ASTCRS	100507436	6	31399784	31415315	267	34	377277	1	7.3337	1.1191e-13
ASTCRS	4277	6	31494277	31511124	242	29	377277	1	7.0373	9.8005e-13
ASTCRS	401250	6	31528962	31530231	22	7	377277	1	6.5945	2.1335e-11
ASTCRS	7919	6	31530219	31542475	95	26	377277	1	7.2145	2.7062e-13
ASTCRS	534	6	31544451	31546848	15	10	377277	1	8.0988	2.7756e-16
ASTCRS	4795	6	31546851	31558829	77	23	377277	1	6.7308	8.4368e-12
ASTCRS	4049	6	31560550	31574324	69	18	377277	1	5.5604	1.3457e-08
ASTCRS	ENSG00000204472	6	31582961	31584798	9	4	397283	1	4.9229	4.2642e-07
ASTCRS	7940	6	31586179	31588909	17	11	377277	1	7.7972	3.1641e-15
ASTCRS	ENSG00000204469	6	31588497	31605548	54	12	397043	1	4.9383	3.9412e-07
ASTCRS	259197	6	31588883	31593019	30	15	377277	1	7.186	3.3357e-13
ASTCRS	ENSG00000204463	6	31606805	31620482	38	11	397312	1	7.4184	5.9286e-14
ASTCRS	199	6	31615192	31617021	9	4	377277	1	5.0216	2.5625e-07
ASTCRS	ENSG00000204444	6	31620193	31625987	4	2	397150	1	5.7147	5.4944e-09
ASTCRS	7916	6	31620673	31637777	102	32	377277	1	5.5067	1.8282e-08
ASTCRS	ENSG00000204435	6	31633013	31638120	16	7	396965	1	5.3515	4.3609e-08
ASTCRS	ENSG00000263020	6	31633879	31641323	11	5	396818	1	5.4807	2.1188e-08
ASTCRS	7917	6	31639028	31660767	101	38	377277	1	7.5326	2.4869e-14
ASTCRS	55937	6	31652410	31658210	27	14	377277	1	5.9996	9.888e-10
ASTCRS	ENSG00000204422	6	31654739	31681849	39	11	397091	1	5.0597	2.0994e-07
ASTCRS	7918	6	31661229	31666283	30	13	377277	1	5.9874	1.066e-09
ASTCRS	1460	6	31665880	31670070	16	8	377277	1	6.8627	3.3791e-12
ASTCRS	58496	6	31670951	31672450	9	5	377277	1	5.3658	4.03e-08
ASTCRS	ENSG00000250641	6	31674681	31685695	10	4	397203	1	5.6968	6.1046e-09
ASTCRS	7920	6	31686949	31703360	62	24	377277	1	6.7242	8.829e-12
ASTCRS	ENSG00000213722	6	31694815	31698394	4	2	397234	1	5.6537	7.8519e-09
ASTCRS	259215	6	31706907	31710595	15	8	377277	1	6.5357	3.1651e-11
ASTCRS	80740	6	31718648	31721734	16	9	377277	1	5.3838	3.6461e-08
ASTCRS	80739	6	31720808	31726710	18	12	377277	1	5.1186	1.5387e-07
ASTCRS	23564	6	31727037	31730265	18	12	377277	1	5.4198	2.9826e-08
ASTCRS	1192	6	31730581	31737318	28	18	377277	1	6.0296	8.2175e-10
ASTCRS	ENSG00000204396	6	31733367	31745108	22	9	396959	1	6.5188	3.543e-11
ASTCRS	4439	6	31739948	31762678	95	31	377277	1	6.1094	5e-10
ASTCRS	80737	6	31765401	31777331	53	21	377277	1	6.2715	1.7876e-10
ASTCRS	7407	6	31777518	31795935	61	30	377277	1	7.7104	6.2728e-15
ASTCRS	57819	6	31797392	31806984	39	20	377277	1	7.7972	3.1641e-15
ASTCRS	3305	6	31809619	31821999	49	26	377277	1	5.9781	1.1285e-09
ASTCRS	3304	6	31827735	31830254	7	5	377277	1	6.9358	2.0194e-12
ASTCRS	50854	6	31834915	31839766	26	15	377277	1	7.0611	8.2606e-13
ASTCRS	ENSG00000204371	6	31847536	31865464	21	9	397276	1	6.3183	1.322e-10
ASTCRS	80736	6	31863192	31879046	86	21	377277	1	6.4766	4.6912e-11
ASTCRS	10919	6	31879759	31897707	81	37	377277	1	7.2517	2.0572e-13
ASTCRS	717	6	31897785	31945674	194	49	377277	1	5.8842	2e-09
ASTCRS	629	6	31945944	31952084	33	18	377277	1	7.3206	1.234e-13
ASTCRS	7936	6	31952087	31959087	28	14	377277	1	7.1123	5.7049e-13
ASTCRS	6499	6	31958804	31969755	54	23	377277	1	5.8521	2.4267e-09
ASTCRS	8859	6	31971175	31981446	49	21	377277	1	6.6054	1.9822e-11
ASTCRS	1589	6	32038316	32041670	37	20	377277	1	7.4284	5.4956e-14
ASTCRS	7148	6	32041155	32109374	288	57	377277	1	7.6501	1.0038e-14
ASTCRS	ENSG00000258388	6	32121622	32139755	8	5	397249	1	6.8605	3.432e-12
ASTCRS	ENSG00000204310	6	32135989	32145873	18	7	397242	1	5.6489	8.0759e-09
ASTCRS	80863	6	32148363	32151943	4	2	377277	1	7.1947	3.1297e-13
ASTCRS	9374	6	32153452	32163681	37	20	377277	1	6.3933	8.1182e-11
ASTCRS	80864	6	32164605	32168285	20	10	377277	1	4.9664	3.4109e-07
ASTCRS	10554	6	32168206	32178111	28	13	377277	1	7.1163	5.5445e-13
ASTCRS	6048	6	32178385	32180793	13	5	377277	1	5.4845	2.0731e-08
ASTCRS	177	6	32180968	32184322	21	12	377277	1	6.7052	1.0055e-11
ASTCRS	5089	6	32184733	32190186	19	10	377277	1	5.3693	3.9525e-08
ASTCRS	63940	6	32190766	32195523	18	10	377277	1	5.8717	2.1564e-09
ASTCRS	4855	6	32194843	32224067	192	46	377277	1	6.4846	4.4493e-11
ASTCRS	101929163	6	32255717	32407822	2083	47	377277	1	9.0154	9.8113e-20
ASTCRS	ENSG00000204296	6	32256303	32339684	98	8	397207	1	5.5774	1.2209e-08
ASTCRS	10665	6	32288541	32372114	934	35	377277	1	7.166	3.8601e-13
ASTCRS	56244	6	32393339	32408879	444	16	377277	1	7.3792	7.9638e-14
ASTCRS	3122	6	32439842	32445046	71	14	377277	1	6.1094	5e-10
ASTCRS	ENSG00000198502	6	32485120	32498064	2	1	390857	1	6.1094	5e-10
ASTCRS	ENSG00000196126	6	32546546	32557625	5	2	394289	1	6.2074	2.6932e-10
ASTCRS	ENSG00000196735	6	32595956	32614839	3	1	388825	1	6.1094	5e-10
ASTCRS	ENSG00000179344	6	32627244	32636160	39	7	394470	1	7.0391	9.6745e-13
ASTCRS	3117	6	32637396	32654774	145	12	377277	1	6.1094	5e-10
ASTCRS	3119	6	32659464	32666689	117	16	377277	1	6.1094	5e-10
ASTCRS	ENSG00000250264	6	32781544	32806599	3	1	397370	1	6.1094	5e-10
ASTCRS	ENSG00000204267	6	32789610	32806557	3	1	397370	1	6.1094	5e-10
ASTCRS	3112	6	32812763	32817048	42	13	377277	1	7.1488	4.3765e-13
ASTCRS	6891	6	32821833	32838823	174	32	377277	1	7.5317	2.5036e-14
ASTCRS	60468	6	89926528	90296908	1343	165	377277	1	8.2652	6.9724e-17
ASTCRS	ENSG00000112182	6	90636248	91006627	616	81	394535	1	8.3107	4.7586e-17
ASTCRS	90865	9	6215149	6257983	168	29	377277	1	6.1094	5e-10
ASTCRS	ENSG00000137033	9	6215805	6257983	127	17	394147	1	7.7222	5.7176e-15
ASTCRS	89882	9	6328349	6331900	21	12	377277	1	8.1259	2.2204e-16
ASTCRS	ENSG00000170777	9	6328349	6331900	9	3	395535	1	7.7677	3.9968e-15
ASTCRS	ENSG00000178445	9	6532464	6645650	384	50	393268	1	5.4099	3.1523e-08
ASTCRS	2731	9	6532464	6645692	664	86	377277	1	5.8002	3.3114e-09
ASTCRS	ENSG00000134460	10	6052652	6104288	215	37	394914	1	6.253	2.0132e-10
ASTCRS	2625	10	8045428	8075201	157	34	377277	1	5.8539	2.4009e-09
ASTCRS	ENSG00000107485	10	8095567	8117161	69	10	393873	1	6.134	4.2839e-10
ASTCRS	ENSG00000134825	11	61535973	61560274	26	5	396066	1	5.2595	7.2225e-08
ASTCRS	ENSG00000168496	11	61560109	61564716	3	2	397230	1	5.0453	2.2639e-07
ASTCRS	ENSG00000134824	11	61560452	61634826	146	15	396120	1	5.7485	4.501e-09
ASTCRS	ENSG00000149485	11	61567099	61596790	31	4	396993	1	5.8135	3.0592e-09
ASTCRS	9415	11	61816203	61867354	216	42	377277	1	5.0748	1.94e-07
ASTCRS	5970	11	65653596	65662972	27	14	377277	1	5.0205	2.5772e-07
ASTCRS	10524	11	65711996	65719606	31	10	377277	1	5.8584	2.3373e-09
ASTCRS	5017	11	65787034	65797219	42	15	377277	1	5.2848	6.2929e-08
ASTCRS	5612	11	76349956	76380965	92	31	377277	1	5.206	9.65e-08
ASTCRS	51564	12	47782722	47820612	200	50	377277	1	5.7842	3.6431e-09
ASTCRS	ENSG00000111540	12	56367697	56388490	35	5	395950	1	6.0849	5.8273e-10
ASTCRS	ENSG00000139531	12	56390964	56400425	9	3	393681	1	5.6619	7.4833e-09
ASTCRS	ENSG00000197728	12	56435637	56438116	4	2	395788	1	5.2923	6.0406e-08
ASTCRS	ENSG00000065361	12	56473641	56497289	28	7	395740	1	5.9745	1.1538e-09
ASTCRS	ENSG00000170426	12	57316938	57328189	34	6	393918	1	5.1988	1.0027e-07
ASTCRS	ENSG00000166888	12	57489191	57525922	59	12	393963	1	7.6164	1.3045e-14
ASTCRS	57511	13	39655627	39791665	511	33	377277	1	5.0266	2.4961e-07
ASTCRS	2308	13	40555664	40666660	367	37	377277	1	6.2431	2.1454e-10
ASTCRS	337867	13	99200425	99386499	758	47	377277	1	5.8998	1.8195e-09
ASTCRS	ENSG00000134882	13	99853028	100038688	398	34	396428	1	7.6303	1.1713e-14
ASTCRS	ENSG00000125245	13	99906968	99913998	14	5	397031	1	5.2194	8.9746e-08
ASTCRS	ENSG00000169508	13	99946784	99959659	23	8	396286	1	5.9391	1.4326e-09
ASTCRS	100529261	14	64914361	65062655	627	74	377277	1	5.7733	3.8877e-09
ASTCRS	2342	14	64986789	65062652	315	47	377277	1	5.3447	4.5273e-08
ASTCRS	4149	14	65006101	65102695	397	55	377277	1	6.5331	3.2209e-11
ASTCRS	6095	15	60488284	61229303	3212	334	377277	1	8.2548	7.6066e-17
ASTCRS	4088	15	67065627	67195195	528	90	377277	1	7.8406	2.2416e-15
ASTCRS	ENSG00000166949	15	67356101	67487533	345	58	394202	1	6.1094	5e-10
ASTCRS	ENSG00000259202	15	67435072	67439277	5	3	392554	1	5.7777	3.7861e-09
ASTCRS	ENSG00000103591	15	67493371	67547533	98	9	396398	1	5.947	1.3655e-09
ASTCRS	4261	16	10866212	10941449	337	77	377277	1	4.9982	2.8931e-07
ASTCRS	23274	16	10944488	11193278	1104	61	377277	1	6.7539	7.1966e-12
ASTCRS	ENSG00000038532	16	11038345	11276046	636	30	395247	1	6.46	5.2336e-11
ASTCRS	3566	16	27313668	27364778	248	43	377277	1	7.6073	1.3989e-14
ASTCRS	ENSG00000077238	16	27324989	27376099	147	18	394252	1	6.7916	5.5455e-12
ASTCRS	50615	16	27402162	27452042	246	67	377277	1	5.5301	1.6e-08
ASTCRS	253982	16	29900826	29920112	44	19	377277	1	6.1094	5e-10
ASTCRS	253980	16	29906335	29926232	59	17	377277	1	6.1187	4.7183e-10
ASTCRS	124446	16	29962030	29973052	29	9	377277	1	5.0284	2.4734e-07
ASTCRS	9344	16	29973641	29992261	42	11	377277	1	5.3356	4.7607e-08
ASTCRS	8448	16	30005514	30023280	49	13	377277	1	5.0524	2.1817e-07
ASTCRS	83723	16	30024427	30053012	78	20	377277	1	5.4017	3.3e-08
ASTCRS	6911	16	30085793	30091937	22	14	377277	1	5.3828	3.6672e-08
ASTCRS	112755	16	30989256	31010638	49	14	377277	1	5.7523	4.4022e-09
ASTCRS	6810	16	31033095	31040168	17	5	377277	1	5.507	1.825e-08
ASTCRS	79759	16	31060843	31074320	36	14	377277	1	5.8355	2.6814e-09
ASTCRS	9726	16	31073756	31083512	28	14	377277	1	4.9659	3.4185e-07
ASTCRS	339105	16	31083424	31090035	24	10	377277	1	5.4524	2.4847e-08
ASTCRS	146547	16	31138923	31150094	24	14	377277	1	5.0136	2.6712e-07
ASTCRS	161882	16	88451431	88535166	467	72	377277	1	5.167	1.1892e-07
ASTCRS	ENSG00000131771	17	37782993	37792879	23	5	396188	1	5.1975	1.0097e-07
ASTCRS	ENSG00000141744	17	37824234	37826728	3	2	394283	1	5.0787	1.9e-07
ASTCRS	ENSG00000161395	17	37827375	37853050	54	3	394288	1	5.9942	1.0223e-09
ASTCRS	ENSG00000141736	17	37844167	37886679	41	8	396315	1	5.8962	1.86e-09
ASTCRS	ENSG00000141741	17	37884749	37887040	2	1	392691	1	5.5434	1.4833e-08
ASTCRS	ENSG00000186075	17	38024417	38034149	33	3	396945	1	6.1094	5e-10
ASTCRS	ENSG00000073605	17	38060848	38076107	47	4	396467	1	7.5965	1.521e-14
ASTCRS	ENSG00000172057	17	38077294	38083854	11	5	396110	1	7.1579	4.0973e-13
ASTCRS	ENSG00000204913	17	38097727	38101000	8	3	395979	1	5.699	6.0269e-09
ASTCRS	ENSG00000167914	17	38119226	38134019	43	6	393288	1	7.3285	1.1635e-13
ASTCRS	ENSG00000108344	17	38137050	38154213	51	6	396246	1	5.3117	5.4311e-08
ASTCRS	ENSG00000008838	17	38175350	38217468	74	8	393445	1	5.7314	4.9806e-09
ASTCRS	84152	17	39626208	39636625	39	13	377277	1	7.0805	7.1815e-13
ASTCRS	10948	17	39637080	39664201	111	20	377277	1	5.209	9.4936e-08
ASTCRS	8557	17	39665346	39666554	6	4	377277	1	6.406	7.4683e-11
ASTCRS	5409	17	39667981	39670475	8	5	377277	1	7.8163	2.72e-15
ASTCRS	93210	17	39671122	39688070	84	8	377277	1	6.9255	2.1725e-12
ASTCRS	2064	17	39688084	39728662	121	39	377277	1	6.1094	5e-10
ASTCRS	22806	17	39757715	39864188	339	18	377277	1	5.325	5.048e-08
ASTCRS	124626	17	39868164	39877896	45	8	377277	1	6.1094	5e-10
ASTCRS	55876	17	39904595	39919377	77	11	377277	1	7.1003	6.2222e-13
ASTCRS	94103	17	39921042	39927631	24	14	377277	1	7.9057	1.3323e-15
ASTCRS	100505591	17	39927722	39945034	69	19	377277	1	6.1094	5e-10
ASTCRS	284110	17	39962973	39977880	67	15	377277	1	7.0328	1.0122e-12
ASTCRS	5709	17	39980768	39997960	79	12	377277	1	6.004	9.6268e-10
ASTCRS	1440	17	40015361	40017813	12	4	377277	1	4.9363	3.9801e-07
ASTCRS	9862	17	40019097	40054636	107	23	377277	1	6.6605	1.3644e-11
ASTCRS	9572	17	40092784	40100725	22	10	377277	1	5.2721	6.7424e-08
ASTCRS	3859	17	40861178	40867210	19	11	377277	1	5.1266	1.4748e-07
ASTCRS	ENSG00000198740	17	47366568	47439835	148	14	396162	1	5.3282	4.9591e-08
ASTCRS	ENSG00000262039	17	47448102	47554350	252	43	393517	1	4.9653	3.4303e-07
ASTCRS	2793	17	49204442	49210574	29	13	377277	1	6.1709	3.3942e-10
ASTCRS	51225	17	49210227	49223225	59	19	377277	1	5.0721	1.967e-07
ASTCRS	162466	17	49223366	49231692	25	8	377277	1	4.9242	4.2353e-07
ASTCRS	22834	17	49289206	49362473	227	32	377277	1	7.3728	8.3544e-14
ASTCRS	596	18	63123346	63319778	857	163	377277	1	4.9196	4.3354e-07
ASTCRS	54963	20	63939829	63959435	79	35	377277	1	4.9271	4.1733e-07
ASTCRS	ENSG00000159216	21	36160098	37376965	3279	238	394995	1	5.5113	1.7812e-08
ASTCRS	3560	22	37125838	37149922	134	38	377277	1	6.1094	5e-10
ASTCRS	ENSG00000100385	22	37521878	37571094	121	27	393365	1	5.3755	3.819e-08

## Sheet: Supplementary Data 7
FinnGen
Full Name	Affiliation	E-mail	Role 1	Role 2
Aarno Palotie	Institute for Molecular Medicine Finland (FIMM), HiLIFE, University of Helsinki, Helsinki, Finland; Broad Institute of MIT and Harvard; Massachusetts General Hospital	aarno.palotie@helsinki.fi	Steering Committee	Steering Committee
Mark Daly	Institute for Molecular Medicine Finland (FIMM), HiLIFE, University of Helsinki, Helsinki, Finland; Broad Institute of MIT and Harvard; Massachusetts General Hospital	mark.daly@helsinki.fi	Steering Committee	Steering Committee
Bridget Riley-Gills	Abbvie, Chicago, IL, United States	bridget.rileygillis@abbvie.com	Steering Committee	Pharmaceutical companies
Howard Jacob	Abbvie, Chicago, IL, United States	howard.jacob@abbvie.com	Steering Committee	Pharmaceutical companies
Coralie Viollet	Astra Zeneca, Cambridge, United Kingdom	coralie.viollet@astrazeneca.com	Steering Committee	Pharmaceutical companies
Slavé Petrovski	Astra Zeneca, Cambridge, United Kingdom	slav.petrovski@astrazeneca.com	Steering Committee	Pharmaceutical companies
Chia-Yen Chen	Biogen, Cambridge, MA, United States	chiayen.chen@biogen.com	Steering Committee	Pharmaceutical companies
Sally John	Biogen, Cambridge, MA, United States	sally.john@biogen.com	Steering Committee	Pharmaceutical companies
George Okafo	Boehringer Ingelheim, Ingelheim am Rhein, Germany	george.okafo@boehringer-ingelheim.com	Steering Committee	Pharmaceutical companies
Robert Plenge	Bristol Myers Squibb, New York, NY, United States	robert.plenge@bms.com	Steering Committee	Pharmaceutical companies
Joseph Maranville	Bristol Myers Squibb, New York, NY, United States	joseph.maranville@bms.com	Steering Committee	Pharmaceutical companies
Mark McCarthy	Genentech, San Francisco, CA, United States	mccarthy.mark@gene.com	Steering Committee	Pharmaceutical companies
Rion Pendergrass	Genentech, San Francisco, CA, United States	penders2@gene.com	Steering Committee	Pharmaceutical companies
Jonathan Davitte	GlaxoSmithKline, Collegeville, PA, United States	jonathan.m.davitte@gsk.com	Steering Committee	Pharmaceutical companies
Kirsi Auro	GlaxoSmithKline, Espoo, Finland	kirsi.x.auro@gsk.com	Steering Committee	Pharmaceutical companies
Simonne Longerich	Merck, Kenilworth, NJ, United States	simonne.longerich@merck.com	Steering Committee	Pharmaceutical companies
Anders Mälarstig	Pfizer, New York, NY, United States	anders.malarstig@pfizer.com	Steering Committee	Pharmaceutical companies
Anna Vlahiotis	Pfizer, New York, NY, United States	anna.vlahiotis@pfizer.com	Steering Committee	Pharmaceutical companies
Katherine Klinger	Translational Sciences, Sanofi R&D, Framingham, MA, USA	katherine.klinger@sanofi.com	Steering Committee	Pharmaceutical companies
Clement Chatelain	Translational Sciences, Sanofi R&D, Framingham, MA, USA	clement.chatelain@sanofi.com	Steering Committee	Pharmaceutical companies
Jorg Blankenstein	Translational Sciences, Sanofi R&D, Framingham, MA, USA	jorg.blankenstein@sanofi.com	Steering Committee	Pharmaceutical companies
Karol Estrada	Maze Therapeutics, San Francisco, CA, United States	kestrada@mazetx.com	Steering Committee	Pharmaceutical companies
Robert Graham	Maze Therapeutics, San Francisco, CA, United States	rgraham@mazetx.com	Steering Committee	Pharmaceutical companies
Dawn Waterworth	Janssen Research & Development, LLC, Spring House, PA, United States	dwaterwo@its.jnj.com	Steering Committee	Pharmaceutical companies
Chris O´Donnell	Novartis Institutes for BioMedical Research, Cambridge, MA, United States	chris.odonnell@novartis.com	Steering Committee	Pharmaceutical companies
Nicole Renaud	Novartis Institutes for BioMedical Research, Cambridge, MA, United States	nicole.renaud@novartis.com	Steering Committee	Pharmaceutical companies
Tomi P. Mäkelä	HiLIFE, University of Helsinki, Finland, Finland	tomi.makela@helsinki.fi	Steering Committee	University of Helsinki & Biobanks
Jaakko Kaprio	Institute for Molecular Medicine Finland (FIMM), HiLIFE, University of Helsinki, Helsinki, Finland	jaakko.kaprio@helsinki.fi	Steering Committee	University of Helsinki & Biobanks
Minna Ruddock	Arctic biobank / University of Oulu	minna.ruddock@oulu.fi	Steering Committee	University of Helsinki & Biobanks
Petri Virolainen	Auria Biobank / University of Turku / Hospital District of Southwest Finland, Turku, Finland	petri.virolainen@tyks.fi	Steering Committee	University of Helsinki & Biobanks
Antti Hakanen	Auria Biobank / University of Turku / Hospital District of Southwest Finland, Turku, Finland	antti.hakanen@tyks.fi	Steering Committee	University of Helsinki & Biobanks
Terhi Kilpi	THL Biobank / Finnish Institute for Health and Welfare (THL), Helsinki, Finland	terhi.kilpi@thl.fi	Steering Committee	University of Helsinki & Biobanks
Markus Perola	THL Biobank / Finnish Institute for Health and Welfare (THL), Helsinki, Finland	markus.perola@thl.fi	Steering Committee	University of Helsinki & Biobanks
Jukka Partanen	Finnish Red Cross Blood Service / Finnish Hematology Registry and Clinical Biobank, Helsinki, Finland	jukka.partanen@veripalvelu.fi	Steering Committee	University of Helsinki & Biobanks
Taneli Raivio	Helsinki Biobank / Helsinki University and Hospital District of Helsinki and Uusimaa, Helsinki	taneli.raivio@hus.fi	Steering Committee	University of Helsinki & Biobanks
Jani Tikkanen	Northern Finland Biobank Borealis / University of Oulu / Northern Ostrobothnia Hospital District, Oulu, Finland	jani.tikkanen@pohde.fi	Steering Committee	University of Helsinki & Biobanks
Raisa Serpi	Northern Finland Biobank Borealis / University of Oulu / Northern Ostrobothnia Hospital District, Oulu, Finland	raisa.serpi@oulu.fi	Steering Committee	University of Helsinki & Biobanks
Kati Kristiansson	Finnish Clinical Biobank Tampere / University of Tampere / Pirkanmaa Hospital District, Tampere, Finland	kati.kristiansson@pirha.fi	Steering Committee	University of Helsinki & Biobanks
Veli-Matti Kosma	Biobank of Eastern Finland / University of Eastern Finland / Northern Savo Hospital District, Kuopio, Finland	veli-matti.kosma@uef.fi	Steering Committee	University of Helsinki & Biobanks
Jari Laukkanen	Central Finland Biobank / University of Jyväskylä / Central Finland Health Care District, Jyväskylä, Finland	jari.laukkanen@hyvaks.fi	Steering Committee	University of Helsinki & Biobanks
Marco Hautalahti	FINBB - Finnish biobank cooperative	marco.hautalahti@finbb.fi	Steering Committee	University of Helsinki & Biobanks
Outi Tuovila	Business Finland, Helsinki, Finland	outi.tuovila@businessfinland.fi	Steering Committee	Other Experts/ Non-Voting Members
Jeffrey Waring	Abbvie, Chicago, IL, United States	jeff.waring@abbvie.com	Scientific Committee	Pharmaceutical companies
Bridget Riley-Gillis	Abbvie, Chicago, IL, United States	bridget.rileygillis@abbvie.com	Scientific Committee	Pharmaceutical companies
Fedik Rahimov	Abbvie, Chicago, IL, United States	fedik.rahimov@abbvie.com	Scientific Committee	Pharmaceutical companies
Ioanna Tachmazidou	Astra Zeneca, Cambridge, United Kingdom	ioanna.tachmazidou@astrazeneca.com	Scientific Committee	Pharmaceutical companies
Chia-Yen Chen	Biogen, Cambridge, MA, United States	chiayen.chen@biogen.com	Scientific Committee	Pharmaceutical companies
Zhihao Ding	Boehringer Ingelheim, Ingelheim am Rhein, Germany	zhihao.ding@boehringer-ingelheim.com	Scientific Committee	Pharmaceutical companies
Marc Jung	Boehringer Ingelheim, Ingelheim am Rhein, Germany	marc_oliver.jung@boehringer-ingelheim.com	Scientific Committee	Pharmaceutical companies
Hanati Tuoken	Boehringer Ingelheim, Ingelheim am Rhein, Germany	hanati.tuoken@boehringer-ingelheim.com	Scientific Committee	Pharmaceutical companies
Shameek Biswas	Bristol Myers Squibb, New York, NY, United States	Shameek.Biswas@bms.com	Scientific Committee	Pharmaceutical companies
Rion Pendergrass	Genentech, San Francisco, CA, United States	penders2@gene.com	Scientific Committee	Pharmaceutical companies
Jonathan Davitte	GlaxoSmithKline, Collegeville, PA, United States	jonathan.m.davitte@gsk.com	Scientific Committee	Pharmaceutical companies
Neha Raghavan	Merck, Kenilworth, NJ, United States	neha.raghavan@merck.com	Scientific Committee	Pharmaceutical companies
Adriana Huertas-Vazquez	Merck, Kenilworth, NJ, United States	adriana.huertas.vazquez@merck.com	Scientific Committee	Pharmaceutical companies
Jae-Hoon Sul	Merck, Kenilworth, NJ, United States	jae.hoon.sul@merck.com	Scientific Committee	Pharmaceutical companies
Anders Mälarstig	Pfizer, New York, NY, United States	anders.malarstig@pfizer.com	Scientific Committee	Pharmaceutical companies
Xinli Hu	Pfizer, New York, NY, United States	xinli.hu@pfizer.com	Scientific Committee	Pharmaceutical companies
Åsa Hedman	Pfizer, New York, NY, United States	asa.hedman@pfizer.com	Scientific Committee	Pharmaceutical companies
Katherine Klinger	Translational Sciences, Sanofi R&D, Framingham, MA, USA	katherine.klinger@sanofi.com	Scientific Committee	Pharmaceutical companies
Robert Graham	Maze Therapeutics, San Francisco, CA, United States	rgraham@mazetx.com	Scientific Committee	Pharmaceutical companies
Dawn Waterworth	Janssen Research & Development, LLC, Spring House, PA, United States	dwaterwo@its.jnj.com	Scientific Committee	Pharmaceutical companies
Nicole Renaud	Novartis Institutes for BioMedical Research, Cambridge, MA, United States	nicole.renaud@novartis.com	Scientific Committee	Pharmaceutical companies
Ma´en Obeidat	Novartis Institutes for BioMedical Research, Cambridge, MA, United States	maen.obeidat@novartis.com	Scientific Committee	Pharmaceutical companies
Jonathan Chung	Novartis Institutes for BioMedical Research, Cambridge, MA, United States	jonathan.chung@novartis.com	Scientific Committee	Pharmaceutical companies
Jonas Zierer	Novartis Institutes for BioMedical Research, Cambridge, MA, United States	jonas.zierer@novartis.com	Scientific Committee	Pharmaceutical companies
Mari Niemi	Novartis Institutes for BioMedical Research, Cambridge, MA, United States	mari.niemi@novartis.com	Scientific Committee	Pharmaceutical companies
Samuli Ripatti	Institute for Molecular Medicine Finland (FIMM), HiLIFE, University of Helsinki, Helsinki, Finland	samuli.ripatti@helsinki.fi	Scientific Committee	University of Helsinki & Biobanks
Johanna Schleutker	Auria Biobank / Univ. of Turku / Hospital District of Southwest Finland, Turku, Finland	johanna.schleutker@utu.fi	Scientific Committee	University of Helsinki & Biobanks
Markus Perola	THL Biobank / Finnish Institute for Health and Welfare (THL), Helsinki, Finland	markus.perola@thl.fi	Scientific Committee	University of Helsinki & Biobanks
Mikko Arvas	Finnish Red Cross Blood Service / Finnish Hematology Registry and Clinical Biobank, Helsinki, Finland	mikko.arvas@veripalvelu.fi	Scientific Committee	University of Helsinki & Biobanks
Olli Carpén	Helsinki Biobank / Helsinki University and Hospital District of Helsinki and Uusimaa, Helsinki	olli.carpen@helsinki.fi	Scientific Committee	University of Helsinki & Biobanks
Reetta Hinttala	Northern Finland Biobank Borealis / University of Oulu / Northern Ostrobothnia Hospital District, Oulu, Finland	reetta.hinttala@oulu.fi	Scientific Committee	University of Helsinki & Biobanks
Johannes Kettunen	Northern Finland Biobank Borealis / University of Oulu / Northern Ostrobothnia Hospital District, Oulu, Finland	johannes.kettunen@oulu.fi	Scientific Committee	University of Helsinki & Biobanks
Arto Mannermaa	Biobank of Eastern Finland / University of Eastern Finland / Northern Savo Hospital District, Kuopio, Finland	arto.mannermaa@uef.fi	Scientific Committee	University of Helsinki & Biobanks
Katriina Aalto-Setälä	Faculty of Medicine and Health Technology, Tampere University, Tampere, Finland	katriina.aalto-setala@tuni.fi	Scientific Committee	University of Helsinki & Biobanks
Mika Kähönen	Finnish Clinical Biobank Tampere / University of Tampere / Pirkanmaa Hospital District, Tampere, Finland	mika.kahonen@uta.fi	Scientific Committee	University of Helsinki & Biobanks
Jari Laukkanen	Central Finland Biobank / University of Jyväskylä / Central Finland Health Care District, Jyväskylä, Finland	jari.laukkanen@hyvaks.fi	Scientific Committee	University of Helsinki & Biobanks
Johanna Mäkelä	FINBB - Finnish biobank cooperative	johanna.makela@finbb.fi	Scientific Committee	University of Helsinki & Biobanks
Reetta Kälviäinen	Northern Savo Hospital District, Kuopio, Finland	reetta.kalviainen@kuh.fi	Clinical Groups	Neurology Group
Valtteri Julkunen	Northern Savo Hospital District, Kuopio, Finland	valtteri.julkunen@kuh.fi	Clinical Groups	Neurology Group
Hilkka Soininen	Northern Savo Hospital District, Kuopio, Finland	hilkka.soininen@uef.fi	Clinical Groups	Neurology Group
Anne Remes	Northern Ostrobothnia Hospital District, Oulu, Finland	anne.remes@oulu.fi	Clinical Groups	Neurology Group
Mikko Hiltunen	University of Eastern Finland, Kuopio, Finland	mikko.hiltunen@uef.fi	Clinical Groups	Neurology Group
Jukka Peltola	Pirkanmaa Hospital District, Tampere, Finland	jukka.peltola@pshp.fi	Clinical Groups	Neurology Group
Minna Raivio	Hospital District of Helsinki and Uusimaa, Helsinki, Finland	minna.raivio@geri.fi	Clinical Groups	Neurology Group
Pentti Tienari	Hospital District of Helsinki and Uusimaa, Helsinki, Finland	pentti.tienari@hus.fi	Clinical Groups	Neurology Group
Juha Rinne	Hospital District of Southwest Finland, Turku, Finland	juha.rinne@tyks.fi	Clinical Groups	Neurology Group
Roosa Kallionpää	Hospital District of Southwest Finland, Turku, Finland	roosa.kallionpaa@tyks.fi	Clinical Groups	Neurology Group
Juulia Partanen	Institute for Molecular Medicine Finland, HiLIFE, University of Helsinki, Finland	juulia.partanen@helsinki.fi	Clinical Groups	Neurology Group
Adam Ziemann	Abbvie, Chicago, IL, United States	adam.ziemann@abbvie.com	Clinical Groups	Neurology Group
Nizar Smaoui	Abbvie, Chicago, IL, United States	nizar.smaoui@abbvie.com	Clinical Groups	Neurology Group
Anne Lehtonen	Abbvie, Chicago, IL, United States	anne.lehtonen@abbvie.com	Clinical Groups	Neurology Group
Susan Eaton	Biogen, Cambridge, MA, United States	susan.eaton@biogen.com	Clinical Groups	Neurology Group
Heiko Runz	Biogen, Cambridge, MA, United States	heiko.runz@biogen.com	Clinical Groups	Neurology Group
Sanni Lahdenperä	Biogen, Cambridge, MA, United States	sanni.lahdenpera@biogen.com	Clinical Groups	Neurology Group
Shameek Biswas	Bristol Myers Squibb, New York, NY, United States	shameek.biswas@bms.com	Clinical Groups	Neurology Group
Natalie Bowers	Genentech, San Francisco, CA, United States	bowersn1@gene.com	Clinical Groups	Neurology Group
Edmond Teng	Genentech, San Francisco, CA, United States	teng.edmond@gene.com	Clinical Groups	Neurology Group
Rion Pendergrass	Genentech, San Francisco, CA, United States	penders2@gene.com	Clinical Groups	Neurology Group
Fanli Xu	GlaxoSmithKline, Brentford, United Kingdom	chun-fang.2.xu@gsk.com	Clinical Groups	Neurology Group
David Pulford	GlaxoSmithKline, Stevenage, United Kingdom	david.x.pulford@gsk.com	Clinical Groups	Neurology Group
Kirsi Auro	GlaxoSmithKline, Espoo, Finland	kirsi.m.auro@gsk.com	Clinical Groups	Neurology Group
Laura Addis	GlaxoSmithKline, Brentford, United Kingdom	laura.x.addis@gsk.com	Clinical Groups	Neurology Group
John Eicher	GlaxoSmithKline, Brentford, United Kingdom	john.d.eicher@gsk.com	Clinical Groups	Neurology Group
Qingqin S Li	Janssen Research & Development, LLC, Titusville, NJ 08560, United States	QLi2@its.jnj.com	Clinical Groups	Neurology Group
Karen He	Janssen Research & Development, LLC, Spring House, PA, United States	khe2@its.jnj.com	Clinical Groups	Neurology Group
Ekaterina Khramtsova	Janssen Research & Development, LLC, Spring House, PA, United States	ekhramts@its.jnj.com	Clinical Groups	Neurology Group
Neha Raghavan	Merck, Kenilworth, NJ, United States	neha.raghavan@merck.com	Clinical Groups	Neurology Group
Martti Färkkilä	Hospital District of Helsinki and Uusimaa, Helsinki, Finland	martti.farkkila@hus.fi	Clinical Groups	Gastroenterology Group
Jukka Koskela	Hospital District of Helsinki and Uusimaa, Helsinki, Finland	jukka.koskela@helsinki.fi	Clinical Groups	Gastroenterology Group
Sampsa Pikkarainen	Hospital District of Helsinki and Uusimaa, Helsinki, Finland	sampsa.pikkarainen@hus.fi	Clinical Groups	Gastroenterology Group
Airi Jussila	Pirkanmaa Hospital District, Tampere, Finland	airi.jussila@pshp.fi	Clinical Groups	Gastroenterology Group
Katri Kaukinen	Pirkanmaa Hospital District, Tampere, Finland	katri.kaukinen@tuni.fi	Clinical Groups	Gastroenterology Group
Timo Blomster	Northern Ostrobothnia Hospital District, Oulu, Finland	timo.blomster@ppshp.fi	Clinical Groups	Gastroenterology Group
Mikko Kiviniemi	Northern Savo Hospital District, Kuopio, Finland	mikko.kiviniemi@kuh.fi	Clinical Groups	Gastroenterology Group
Markku Voutilainen	Hospital District of Southwest Finland, Turku, Finland	markku.voutilainen@tyks.fi	Clinical Groups	Gastroenterology Group
Mark Daly	Institute for Molecular Medicine, Finland (FIMM), HiLIFE, University of Helsinki, Helsinki, Finland; Broad Institute of MIT and Harvard; Massachusetts General Hospital	mark.daly@helsinki.fi	Clinical Groups	Gastroenterology Group
Jeffrey Waring	Abbvie, Chicago, IL, United States	jeff.waring@abbvie.com	Clinical Groups	Gastroenterology Group
Nizar Smaoui	Abbvie, Chicago, IL, United States	nizar.smaoui@abbvie.com	Clinical Groups	Gastroenterology Group
Fedik Rahimov	Abbvie, Chicago, IL, United States	fedik.rahimov@abbvie.com	Clinical Groups	Gastroenterology Group
Anne Lehtonen	Abbvie, Chicago, IL, United States	anne.lehtonen@abbvie.com	Clinical Groups	Gastroenterology Group
Tim Lu	Genentech, San Francisco, CA, United States	lut8@gene.com	Clinical Groups	Gastroenterology Group
Natalie Bowers	Genentech, San Francisco, CA, United States	bowersn1@gene.com	Clinical Groups	Gastroenterology Group
Rion Pendergrass	Genentech, San Francisco, CA, United States	penders2@gene.com	Clinical Groups	Gastroenterology Group
Linda McCarthy	GlaxoSmithKline, Brentford, United Kingdom	linda.c.mccarthy@gsk.com	Clinical Groups	Gastroenterology Group
Amy Hart	Janssen Research & Development, LLC, Spring House, PA, United States	ahart13@its.jnj.com	Clinical Groups	Gastroenterology Group
Meijian Guan	Janssen Research & Development, LLC, Spring House, PA, United States	mguan4@its.jnj.com	Clinical Groups	Gastroenterology Group
Jason Miller	Merck, Kenilworth, NJ, United States	jason.miller4@merck.com	Clinical Groups	Gastroenterology Group
Kirsi Kalpala	Pfizer, New York, NY, United States	kirsi.kalpala@pfizer.com	Clinical Groups	Gastroenterology Group
Melissa Miller	Pfizer, New York, NY, United States	melissa.r.miller@pfizer.com	Clinical Groups	Gastroenterology Group
Xinli Hu	Pfizer, New York, NY, United States	xinli.hu@pfizer.com	Clinical Groups	Gastroenterology Group
Kari Eklund	Hospital District of Helsinki and Uusimaa, Helsinki, Finland	kari.eklund@hus.fi	Clinical Groups	Rheumatology Group
Antti Palomäki	Hospital District of Southwest Finland, Turku, Finland	ajpalo@utu.fi	Clinical Groups	Rheumatology Group
Pia Isomäki	Pirkanmaa Hospital District, Tampere, Finland	pia.isomaki@pshp.fi	Clinical Groups	Rheumatology Group
Laura Pirilä	Hospital District of Southwest Finland, Turku, Finland	laura.pirila@fimnet.fi,laura.pirila@tyks.fi	Clinical Groups	Rheumatology Group
Oili Kaipiainen-Seppänen	Northern Savo Hospital District, Kuopio, Finland	oili.kaipiainen-seppanen@kuh.fi	Clinical Groups	Rheumatology Group
Johanna Huhtakangas	Northern Ostrobothnia Hospital District, Oulu, Finland	johanna.huhtakangas@kuh.fi	Clinical Groups	Rheumatology Group
Nina Mars	Institute for Molecular Medicine Finland (FIMM), HiLIFE, University of Helsinki, Helsinki, Finland	nina.mars@helsinki.fi	Clinical Groups	Rheumatology Group
Jeffrey Waring	Abbvie, Chicago, IL, United States	jeff.waring@abbvie.com	Clinical Groups	Rheumatology Group
Fedik Rahimov	Abbvie, Chicago, IL, United States	fedik.rahimov@abbvie.com	Clinical Groups	Rheumatology Group
Apinya Lertratanakul	Abbvie, Chicago, IL, United States	apinya.lertratanakul@abbvie.com	Clinical Groups	Rheumatology Group
Nizar Smaoui	Abbvie, Chicago, IL, United States	nizar.smaoui@abbvie.com	Clinical Groups	Rheumatology Group
Anne Lehtonen	Abbvie, Chicago, IL, United States	anne.lehtonen@abbvie.com	Clinical Groups	Rheumatology Group
Coralie Viollet	AstraZeneca, Cambridge, United Kingdom	coralie.viollet@astrazeneca.com	Clinical Groups	Rheumatology Group
Marla Hochfeld	Bristol Myers Squibb, New York, NY, United States	mhochfeld@celgene.com	Clinical Groups	Rheumatology Group
Natalie Bowers	Genentech, San Francisco, CA, United States	bowersn1@gene.com	Clinical Groups	Rheumatology Group
Rion Pendergrass	Genentech, San Francisco, CA, United States	penders2@gene.com	Clinical Groups	Rheumatology Group
Jorge Esparza Gordillo	GlaxoSmithKline, Brentford, United Kingdom	jorge.x.esparza-gordillo@gsk.com	Clinical Groups	Rheumatology Group
Kirsi Auro	GlaxoSmithKline, Espoo, Finland	kirsi.m.auro@gsk.com	Clinical Groups	Rheumatology Group
Dawn Waterworth	Janssen Research & Development, LLC, Spring House, PA, United States	dwaterwo@its.jnj.com	Clinical Groups	Rheumatology Group
Fabiana Farias	Merck, Kenilworth, NJ, United States	fabiana.farias@merck.com	Clinical Groups	Rheumatology Group
Kirsi Kalpala	Pfizer, New York, NY, United States	kirsi.kalpala@pfizer.com	Clinical Groups	Rheumatology Group
Nan Bing	Pfizer, New York, NY, United States	nan.bing@pfizer.com	Clinical Groups	Rheumatology Group
Xinli Hu	Pfizer, New York, NY, United States	xinli.hu@pfizer.com	Clinical Groups	Rheumatology Group
Tarja Laitinen	Pirkanmaa Hospital District, Tampere, Finland	tarja.laitinen@pshp.fi	Clinical Groups	Pulmonology Group
Margit Pelkonen	Northern Savo Hospital District, Kuopio, Finland	margit.pelkonen@kuh.fi	Clinical Groups	Pulmonology Group
Paula Kauppi	Hospital District of Helsinki and Uusimaa, Helsinki, Finland	paula.kauppi@hus.fi	Clinical Groups	Pulmonology Group
Hannu Kankaanranta	University of Gothenburg, Gothenburg, Sweden/ Seinäjoki Central Hospital, Seinäjoki, Finland/ Tampere University, Tampere, Finland	hannu.kankaanranta@tuni.fi	Clinical Groups	Pulmonology Group
Terttu Harju	Northern Ostrobothnia Hospital District, Oulu, Finland	terttu.harju@oulu.fi	Clinical Groups	Pulmonology Group
Riitta Lahesmaa	Hospital District of Southwest Finland, Turku, Finland	rilahes@utu.fi	Clinical Groups	Pulmonology Group
Nizar Smaoui	Abbvie, Chicago, IL, United States	nizar.smaoui@abbvie.com	Clinical Groups	Pulmonology Group
Coralie Viollet	AstraZeneca, Cambridge, United Kingdom	coralie.viollet@astrazeneca.com	Clinical Groups	Pulmonology Group
Susan Eaton	Biogen, Cambridge, MA, United States	susan.eaton@biogen.com	Clinical Groups	Pulmonology Group
Hubert Chen	Genentech, San Francisco, CA, United States	chenh37@gene.com	Clinical Groups	Pulmonology Group
Rion Pendergrass	Genentech, San Francisco, CA, United States	penders2@gene.com	Clinical Groups	Pulmonology Group
Natalie Bowers	Genentech, San Francisco, CA, United States	bowersn1@gene.com	Clinical Groups	Pulmonology Group
Joanna Betts	GlaxoSmithKline, Brentford, United Kingdom	joanna.c.betts@gsk.com	Clinical Groups	Pulmonology Group
Kirsi Auro	GlaxoSmithKline, Espoo, Finland	kirsi.m.auro@gsk.com	Clinical Groups	Pulmonology Group
Rajashree Mishra	GlaxoSmithKline, Brentford, United Kingdom	rajashree.x.mishra@gsk.com	Clinical Groups	Pulmonology Group
Majd Mouded	Novartis, Basel, Switzerland	majd.mouded@novartis.com	Clinical Groups	Pulmonology Group
Debby Ngo	Novartis, Basel, Switzerland	debby.ngo@novartis.com	Clinical Groups	Pulmonology Group
Teemu Niiranen	Finnish Institute for Health and Welfare (THL), Helsinki, Finland	teemu.niiranen@thl.fi	Clinical Groups	Cardiometabolic Diseases Group
Felix Vaura	Finnish Institute for Health and Welfare (THL), Helsinki, Finland	fechva@utu.fi	Clinical Groups	Cardiometabolic Diseases Group
Veikko Salomaa	Finnish Institute for Health and Welfare (THL), Helsinki, Finland	veikko.salomaa@thl.fi	Clinical Groups	Cardiometabolic Diseases Group
Kaj Metsärinne	Hospital District of Southwest Finland, Turku, Finland	kaj.metsarinne@tyks.fi	Clinical Groups	Cardiometabolic Diseases Group
Jenni Aittokallio	Hospital District of Southwest Finland, Turku, Finland	jemato@utu.fi	Clinical Groups	Cardiometabolic Diseases Group
Mika Kähönen	Pirkanmaa Hospital District, Tampere, Finland	mika.kahonen@uta.fi	Clinical Groups	Cardiometabolic Diseases Group
Jussi Hernesniemi	Pirkanmaa Hospital District, Tampere, Finland	jussi.hernesniemi@tuni.fi	Clinical Groups	Cardiometabolic Diseases Group
Daniel Gordin	Hospital District of Helsinki and Uusimaa, Helsinki, Finland	daniel.gordin@hus.fi	Clinical Groups	Cardiometabolic Diseases Group
Juha Sinisalo	Hospital District of Helsinki and Uusimaa, Helsinki, Finland	juha.sinisalo@hus.fi	Clinical Groups	Cardiometabolic Diseases Group
Marja-Riitta Taskinen	Hospital District of Helsinki and Uusimaa, Helsinki, Finland	marja-riitta.taskinen@helsinki.fi	Clinical Groups	Cardiometabolic Diseases Group
Tiinamaija Tuomi	Hospital District of Helsinki and Uusimaa, Helsinki, Finland	tiinamaija.tuomi@hus.fi	Clinical Groups	Cardiometabolic Diseases Group
Timo Hiltunen	Hospital District of Helsinki and Uusimaa, Helsinki, Finland	timo.hiltunen@hus.fi	Clinical Groups	Cardiometabolic Diseases Group
Jari Laukkanen	Central Finland Health Care District, Jyväskylä, Finland	jari.laukkanen@hyvaks.fi	Clinical Groups	Cardiometabolic Diseases Group
Amanda Elliott	Institute for Molecular Medicine Finland (FIMM), HiLIFE, University of Helsinki, Helsinki, Finland; Broad Institute, Cambridge, MA, USA and Massachusetts General Hospital, Boston, MA, USA	aelliott@broadinstitute.org	Clinical Groups	Cardiometabolic Diseases Group
Mary Pat Reeve	Institute for Molecular Medicine Finland (FIMM), HiLIFE, University of Helsinki, Helsinki, Finland	mary.reeve@helsinki.fi	Clinical Groups	Cardiometabolic Diseases Group
Sanni Ruotsalainen	Institute for Molecular Medicine Finland (FIMM), HiLIFE, University of Helsinki, Helsinki, Finland	sanni.ruotsalainen@helsinki.fi	Clinical Groups	Cardiometabolic Diseases Group
Dirk Paul	Astra Zeneca, Cambridge, United Kingdom	dirk.paul@astrazeneca.com	Clinical Groups	Cardiometabolic Diseases Group
Natalie Bowers	Genentech, San Francisco, CA, United States	bowersn1@gene.com	Clinical Groups	Cardiometabolic Diseases Group
Rion Pendergrass	Genentech, San Francisco, CA, United States	penders2@gene.com	Clinical Groups	Cardiometabolic Diseases Group
Audrey Chu	GlaxoSmithKline, Brentford, United Kingdom	audrey.y.chu@gsk.com	Clinical Groups	Cardiometabolic Diseases Group
Kirsi Auro	GlaxoSmithKline, Espoo, Finland	kirsi.m.auro@gsk.com	Clinical Groups	Cardiometabolic Diseases Group
Dermot Reilly	Janssen Research & Development, LLC, Boston, MA, United States	dreill11@its.jnj.com	Clinical Groups	Cardiometabolic Diseases Group
Mike Mendelson	Novartis, Boston, MA, United States	mike.mendelson@novartis.com	Clinical Groups	Cardiometabolic Diseases Group
Jaakko Parkkinen	Pfizer, New York, NY, United States	jaakko.parkkinen@pfizer.com	Clinical Groups	Cardiometabolic Diseases Group
Melissa Miller	Pfizer, New York, NY, United States	melissa.r.miller@pfizer.com	Clinical Groups	Cardiometabolic Diseases Group
Tuomo Meretoja	Department of Breast Surgery, Helsinki University Hospital Comprehensive Cancer Center and University of Helsinki, Helsinki, Finland	tuomo.meretoja@hus.fi	Clinical Groups	Oncology Group
Heikki Joensuu	Department of Oncology, Helsinki University Hospital Comprehensive Cancer Center and University of Helsinki, Helsinki, Finland	heikki.joensuu@hus.fi	Clinical Groups	Oncology Group
Olli Carpén	Hospital District of Helsinki and Uusimaa, Helsinki, Finland	olli.carpen@helsinki.fi	Clinical Groups	Oncology Group
Johanna Mattson	Hospital District of Helsinki and Uusimaa, Helsinki, Finland	johanna.mattson@hus.fi	Clinical Groups	Oncology Group
Eveliina Salminen	Hospital District of Helsinki and Uusimaa, Helsinki, Finland	eveliina.e.salminen@hus.fi	Clinical Groups	Oncology Group
Annika Auranen	Pirkanmaa Hospital District , Tampere, Finland	anaura@utu.fi	Clinical Groups	Oncology Group
Peeter Karihtala	Department of Oncology, Helsinki University Hospital Comprehensive Cancer Center and University of Helsinki, Helsinki, Finland	peeter.karihtala@hus.fi	Clinical Groups	Oncology Group
Päivi Auvinen	Northern Savo Hospital District, Kuopio, Finland	paivi.auvinen@kuh.fi	Clinical Groups	Oncology Group
Klaus Elenius	Hospital District of Southwest Finland, Turku, Finland	klaus.elenius@utu.fi	Clinical Groups	Oncology Group
Johanna Schleutker	Hospital District of Southwest Finland, Turku, Finland	johanna.schleutker@utu.fi	Clinical Groups	Oncology Group
Esa Pitkänen	Institute for Molecular Medicine Finland (FIMM), HiLIFE, University of Helsinki, Helsinki, Finland	esa.pitkanen@helsinki.fi	Clinical Groups	Oncology Group
Nina Mars	Institute for Molecular Medicine Finland (FIMM), HiLIFE, University of Helsinki, Helsinki, Finland	nina.mars@helsinki.fi	Clinical Groups	Oncology Group
Mark Daly	Institute for Molecular Medicine Finland (FIMM), HiLIFE, University of Helsinki, Helsinki, Finland; Broad Institute of MIT and Harvard; Massachusetts General Hospital	mark.daly@helsinki.fi	Clinical Groups	Oncology Group
Relja Popovic	Abbvie, Chicago, IL, United States	relja.popovic@abbvie.com	Clinical Groups	Oncology Group
Jeffrey Waring	Abbvie, Chicago, IL, United States	jeff.waring@abbvie.com	Clinical Groups	Oncology Group
Bridget Riley-Gillis	Abbvie, Chicago, IL, United States	bridget.rileygillis@abbvie.com	Clinical Groups	Oncology Group
Anne Lehtonen	Abbvie, Chicago, IL, United States	anne.lehtonen@abbvie.com	Clinical Groups	Oncology Group
Margarete Fabre	AstraZeneca, Cambridge, United Kingdom	margarete.fabre@astrazeneca.com	Clinical Groups	Oncology Group
Jennifer Schutzman	Genentech, San Francisco, CA, United States	schutzman.jennifer@gene.com	Clinical Groups	Oncology Group
Natalie Bowers	Genentech, San Francisco, CA, United States	bowersn1@gene.com	Clinical Groups	Oncology Group
Rion Pendergrass	Genentech, San Francisco, CA, United States	penders2@gene.com	Clinical Groups	Oncology Group
Diptee Kulkarni	GlaxoSmithKline, Brentford, United Kingdom	diptee.a.kulkarni@gsk.com	Clinical Groups	Oncology Group
Kirsi Auro	GlaxoSmithKline, Espoo, Finland	kirsi.m.auro@gsk.com	Clinical Groups	Oncology Group
Alessandro Porello	Janssen Research & Development, LLC, Spring House, PA, United States	APorrell@ITS.JNJ.com	Clinical Groups	Oncology Group
Andrey Loboda	Merck, Kenilworth, NJ, United States	andrey_loboda@merck.com	Clinical Groups	Oncology Group
Heli Lehtonen	Pfizer, New York, NY, United States	heli.lehtonen@pfizer.com	Clinical Groups	Oncology Group
Stefan McDonough	Pfizer, New York, NY, United States	stefan.McDonough@pfizer.com	Clinical Groups	Oncology Group
Sauli Vuoti	Janssen-Cilag Oy, Espoo, Finland	svuoti@its.jnj.com	Clinical Groups	Oncology Group
Kai Kaarniranta	Northern Savo Hospital District, Kuopio, Finland; Department of Molecular Genetics, University of Lodz, Lodz, Poland	kai.kaarniranta@uef.fi	Clinical Groups	Opthalmology Group
Joni A Turunen	Helsinki University Hospital and University of Helsinki, Helsinki, Finland; Eye Genetics Group, Folkhälsan Research Center, Helsinki, Finland	joni.turunen@helsinki.fi	Clinical Groups	Opthalmology Group
Terhi Ollila	Hospital District of Helsinki and Uusimaa, Helsinki, Finland	terhi.ollila@hus.fi	Clinical Groups	Opthalmology Group
Hannu Uusitalo	Pirkanmaa Hospital District, Tampere, Finland	hannu.uusitalo@tuni.fi	Clinical Groups	Opthalmology Group
Juha Karjalainen	Institute for Molecular Medicine Finland (FIMM), HiLIFE, University of Helsinki, Helsinki, Finland	juha.karjalainen@helsinki.fi	Clinical Groups	Opthalmology Group
Esa Pitkänen	Institute for Molecular Medicine Finland (FIMM), HiLIFE, University of Helsinki, Helsinki, Finland	esa.pitkanen@helsinki.fi	Clinical Groups	Opthalmology Group
Mengzhen Liu	Abbvie, Chicago, IL, United States	mengzhen.liu@abbvie.com	Clinical Groups	Opthalmology Group
Heiko Runz	Biogen, Cambridge, MA, United States	heiko.runz@biogen.com	Clinical Groups	Opthalmology Group
Stephanie Loomis	Biogen, Cambridge, MA, United States	stephanie.loomis@biogen.com	Clinical Groups	Opthalmology Group
Erich Strauss	Genentech, San Francisco, CA, United States	strauss.erich@gene.com	Clinical Groups	Opthalmology Group
Natalie Bowers	Genentech, San Francisco, CA, United States	bowersn1@gene.com	Clinical Groups	Opthalmology Group
Hao Chen	Genentech, San Francisco, CA, United States	haoc@gene.com	Clinical Groups	Opthalmology Group
Rion Pendergrass	Genentech, San Francisco, CA, United States	penders2@gene.com	Clinical Groups	Opthalmology Group
Kaisa Tasanen	Northern Ostrobothnia Hospital District, Oulu, Finland	kaisa.tasanen-maatta@oulu.fi	Clinical Groups	Dermatology Group
Laura Huilaja	Northern Ostrobothnia Hospital District, Oulu, Finland	laura.huilaja@oulu.fi	Clinical Groups	Dermatology Group
Katariina Hannula-Jouppi	Hospital District of Helsinki and Uusimaa, Helsinki, Finland	katariina.hannula-jouppi@hus.fi	Clinical Groups	Dermatology Group
Teea Salmi	Pirkanmaa Hospital District, Tampere, Finland	teea.salmi@pshp.fi	Clinical Groups	Dermatology Group
Sirkku Peltonen	Hospital District of Southwest Finland, Turku, Finland	sipelto@utu.fi	Clinical Groups	Dermatology Group
Leena Koulu	Hospital District of Southwest Finland, Turku, Finland	leena.koulu@tyks.fi	Clinical Groups	Dermatology Group
Nizar Smaoui	Abbvie, Chicago, IL, United States	nizar.smaoui@abbvie.com	Clinical Groups	Dermatology Group
Fedik Rahimov	Abbvie, Chicago, IL, United States	fedik.rahimov@abbvie.com	Clinical Groups	Dermatology Group
Anne Lehtonen	Abbvie, Chicago, IL, United States	anne.lehtonen@abbvie.com	Clinical Groups	Dermatology Group
David Choy	Genentech, San Francisco, CA, United States	choy.david@gene.com	Clinical Groups	Dermatology Group
Rion Pendergrass	Genentech, San Francisco, CA, United States	penders2@gene.com	Clinical Groups	Dermatology Group
Dawn Waterworth	Janssen Research & Development, LLC, Spring House, PA, United States	dwaterwo@its.jnj.com	Clinical Groups	Dermatology Group
Kirsi Kalpala	Pfizer, New York, NY, United States	kirsi.kalpala@pfizer.com	Clinical Groups	Dermatology Group
Ying Wu	Pfizer, New York, NY, United States	ying.wu3@pfizer.com	Clinical Groups	Dermatology Group
Pirkko Pussinen	Hospital District of Helsinki and Uusimaa, Helsinki, Finland	pirkko.pussinen@helsinki.fi	Clinical Groups	Odontology Group
Aino Salminen	Hospital District of Helsinki and Uusimaa, Helsinki, Finland	aino.m.salminen@helsinki.fi	Clinical Groups	Odontology Group
Tuula Salo	Hospital District of Helsinki and Uusimaa, Helsinki, Finland	tuula.salo@helsinki.fi	Clinical Groups	Odontology Group
David Rice	Hospital District of Helsinki and Uusimaa, Helsinki, Finland	david.rice@helsinki.fi	Clinical Groups	Odontology Group
Pekka Nieminen	Hospital District of Helsinki and Uusimaa, Helsinki, Finland	pekka.nieminen@helsinki.fi	Clinical Groups	Odontology Group
Ulla Palotie	Hospital District of Helsinki and Uusimaa, Helsinki, Finland	ulla.palotie@helsinki.fi	Clinical Groups	Odontology Group
Maria Siponen	Northern Savo Hospital District, Kuopio, Finland	maria.siponen@uef.fi	Clinical Groups	Odontology Group
Liisa Suominen	Northern Savo Hospital District, Kuopio, Finland	liisa.suominen@uef.fi	Clinical Groups	Odontology Group
Päivi Mäntylä	Northern Savo Hospital District, Kuopio, Finland	paivi.mantyla@uef.fi	Clinical Groups	Odontology Group
Ulvi Gursoy	Hospital District of Southwest Finland, Turku, Finland	ulvi.gursoy@utu.fi	Clinical Groups	Odontology Group
Vuokko Anttonen	Northern Ostrobothnia Hospital District, Oulu, Finland	vuokko.anttonen@oulu.fi	Clinical Groups	Odontology Group
Kirsi Sipilä	Research Unit of Oral Health Sciences Faculty of Medicine, University of Oulu, Oulu, Finland; Medical Research Center, Oulu, Oulu University Hospital and University of Oulu, Oulu, Finland	kirsi.sipila@oulu.fi	Clinical Groups	Odontology Group
Rion Pendergrass	Genentech, San Francisco, CA, United States	pendergrass.sarah@gene.com	Clinical Groups	Odontology Group
Hannele Laivuori	Institute for Molecular Medicine Finland (FIMM), HiLIFE, University of Helsinki, Helsinki, Finland	hannele.laivuori@helsinki.fi	Clinical Groups	Women’s Health and Reproduction Group
Venla Kurra	Pirkanmaa Hospital District, Tampere, Finland	venla.kurra@tuni.fi	Clinical Groups	Women’s Health and Reproduction Group
Laura Kotaniemi-Talonen	Pirkanmaa Hospital District, Tampere, Finland	laura.kotaniemi-talonen@tuni.fi	Clinical Groups	Women’s Health and Reproduction Group
Oskari Heikinheimo	Hospital District of Helsinki and Uusimaa, Helsinki, Finland	oskari.heikinheimo@helsinki.fi	Clinical Groups	Women’s Health and Reproduction Group
Ilkka Kalliala	Hospital District of Helsinki and Uusimaa, Helsinki, Finland	ilkka.kalliala@hus.fi	Clinical Groups	Women’s Health and Reproduction Group
Lauri Aaltonen	Hospital District of Helsinki and Uusimaa, Helsinki, Finland	lauri.aaltonen@helsinki.fi	Clinical Groups	Women’s Health and Reproduction Group
Varpu Jokimaa	Hospital District of Southwest Finland, Turku, Finland	varpu.jokimaa@utu.fi	Clinical Groups	Women’s Health and Reproduction Group
Johannes Kettunen	Northern Ostrobothnia Hospital District, Oulu, Finland	Johannes.Kettunen@oulu.fi	Clinical Groups	Women’s Health and Reproduction Group
Marja Vääräsmäki	Northern Ostrobothnia Hospital District, Oulu, Finland	marja.vaarasmaki@oulu.fi	Clinical Groups	Women’s Health and Reproduction Group
Outi Uimari	Northern Ostrobothnia Hospital District, Oulu, Finland	outi.uimari@oulu.fi	Clinical Groups	Women’s Health and Reproduction Group
Laure Morin-Papunen	Northern Ostrobothnia Hospital District, Oulu, Finland	lmp@cc.oulu.fi	Clinical Groups	Women’s Health and Reproduction Group
Maarit Niinimäki	Northern Ostrobothnia Hospital District, Oulu, Finland	maarit.niinimaki@oulu.fi	Clinical Groups	Women’s Health and Reproduction Group
Terhi Piltonen	Northern Ostrobothnia Hospital District, Oulu, Finland	terhi.piltonen@oulu.fi	Clinical Groups	Women’s Health and Reproduction Group
Katja Kivinen	Institute for Molecular Medicine Finland (FIMM), HiLIFE, University of Helsinki, Helsinki, Finland	katja.kivinen@helsinki.fi	Clinical Groups	Women’s Health and Reproduction Group
Elisabeth Widen	Institute for Molecular Medicine Finland (FIMM), HiLIFE, University of Helsinki, Helsinki, Finland	elisabeth.widen@helsinki.fi	Clinical Groups	Women’s Health and Reproduction Group
Taru Tukiainen	Institute for Molecular Medicine Finland (FIMM), HiLIFE, University of Helsinki, Helsinki, Finland	taru.tukiainen@helsinki.fi	Clinical Groups	Women’s Health and Reproduction Group
Mary Pat Reeve	Institute for Molecular Medicine Finland (FIMM), HiLIFE, University of Helsinki, Helsinki, Finland	mary.reeve@helsinki.fi	Clinical Groups	Women’s Health and Reproduction Group
Mark Daly	Institute for Molecular Medicine Finland (FIMM), HiLIFE, University of Helsinki, Helsinki, Finland; Broad Institute of MIT and Harvard; Massachusetts General Hospital	mark.daly@helsinki.fi	Clinical Groups	Women’s Health and Reproduction Group
Niko Välimäki	University of Helsinki, Helsinki, Finland	niko.valimaki@helsinki.fi	Clinical Groups	Women’s Health and Reproduction Group
Eija Laakkonen	University of Jyväskylä, Jyväskylä, Finland	eija.k.laakkonen@jyu.fi	Clinical Groups	Women’s Health and Reproduction Group
Jaakko Tyrmi	University of Oulu, Oulu, Finland / University of Tampere, Tampere, Finland	jaakko.tyrmi@oulu.fi	Clinical Groups	Women’s Health and Reproduction Group
Heidi Silven	University of Oulu, Oulu, Finland	heidi.silven@student.oulu.fi	Clinical Groups	Women’s Health and Reproduction Group
Eeva Sliz	University of Oulu, Oulu, Finland	eeva.sliz@oulu.fi	Clinical Groups	Women’s Health and Reproduction Group
Riikka Arffman	University of Oulu, Oulu, Finland	riikka.arffman@oulu.fi	Clinical Groups	Women’s Health and Reproduction Group
Susanna Savukoski	University of Oulu, Oulu, Finland	susanna.savukoski@oulu.fi	Clinical Groups	Women’s Health and Reproduction Group
Triin Laisk	Estonian biobank, Tartu, Estonia	triin.laisk@ut.ee	Clinical Groups	Women’s Health and Reproduction Group
Natalia Pujol	Estonian biobank, Tartu, Estonia	natalia.pujolgualdo@oulu.fi	Clinical Groups	Women’s Health and Reproduction Group
Mengzhen Liu	Abbvie, Chicago, IL, United States	mengzhen.liu@abbvie.com	Clinical Groups	Women’s Health and Reproduction Group
Bridget Riley-Gillis	Abbvie, Chicago, IL, United States	bridget.rileygillis@abbvie.com	Clinical Groups	Women’s Health and Reproduction Group
Rion Pendergrass	Genentech, San Francisco, CA, United States	penders2@gene.com	Clinical Groups	Women’s Health and Reproduction Group
Janet Kumar	GlaxoSmithKline, Collegeville, PA, United States	janet.x.kumar@gsk.com	Clinical Groups	Women’s Health and Reproduction Group
Kirsi Auro	GlaxoSmithKline, Espoo, Finland	kirsi.m.auro@gsk.com	Clinical Groups	Women’s Health and Reproduction Group
Iiris Hovatta	University of Helsinki, Finland	iiris.hovatta@helsinki.fi	Clinical Groups	Depression group
Chia-Yen Chen	Biogen, Cambridge, MA, United States	chiayen.chen@biogen.com	Clinical Groups	Depression group
Erkki Isometsä	Hospital District of Helsinki and Uusimaa, Helsinki, Finland	erkki.isometsa@hus.fi	Clinical Groups	Depression group
Hanna Ollila	Institute for Molecular Medicine Finland (FIMM), HiLIFE, University of Helsinki, Helsinki, Finland	hanna.m.ollila@helsinki.fi	Clinical Groups	Depression group
Jaana Suvisaari	Finnish Institute for Health and Welfare (THL), Helsinki, Finland	jaana.suvisaari@thl.fi	Clinical Groups	Depression group
Antti Mäkitie	Department of Otorhinolaryngology - Head and Neck Surgery, University of Helsinki and Helsinki University Hospital, Helsinki, Finland	antti.makitie@helsinki.fi	Clinical Groups	ENT (ear, nose and throath) Group
Argyro Bizaki-Vallaskangas	Pirkanmaa Hospital District, Tampere, Finland	argyro.bizaki-vallaskangas@tuni.fi	Clinical Groups	ENT (ear, nose and throath) Group
Sanna Toppila-Salmi	University of Eastern Finland and Kuopio University Hospital, Department of Otorhinolaryngology, Kuopio, Finland and Department of Allergy, Helsinki University Hospital and University of Helsinki, Finland	sanna.salmi@helsinki.fi	Clinical Groups	ENT (ear, nose and throath) Group
Tytti Willberg	Hospital District of Southwest Finland, Turku, Finland	tytti.willberg@tyks.fi	Clinical Groups	ENT (ear, nose and throath) Group
Elmo Saarentaus	Institute for Molecular Medicine Finland (FIMM), HiLIFE, University of Helsinki, Helsinki, Finland	elmo.saarentaus@helsinki.fi	Clinical Groups	ENT (ear, nose and throath) Group
Antti Aarnisalo	Hospital District of Helsinki and Uusimaa, Helsinki, Finland	antti.aarnisalo@hus.fi	Clinical Groups	ENT (ear, nose and throath) Group
Eveliina Salminen	Hospital District of Helsinki and Uusimaa, Helsinki, Finland	eveliina.e.salminen@hus.fi	Clinical Groups	ENT (ear, nose and throath) Group
Elisa Rahikkala	Northern Ostrobothnia Hospital District, Oulu, Finland	elisa.rahikkala@ppshp.fi	Clinical Groups	ENT (ear, nose and throath) Group
Johannes Kettunen	Northern Ostrobothnia Hospital District, Oulu, Finland	johannes.kettunen@oulu.fi	Clinical Groups	ENT (ear, nose and throath) Group
Kristiina Aittomäki	Department of Medical Genetics, Helsinki University Central Hospital, Helsinki, Finland	kristiina.aittomaki@helsinki.fi	Clinical Groups	POI (premature ovarian failure) Group
Fredrik Åberg	Transplantation and Liver Surgery Clinic, Helsinki University Hospital, Helsinki University, Helsinki, Finland	fredrik.aberg@helsinki.fi	Clinical Groups	LiverScore Group
Mitja Kurki	Institute for Molecular Medicine Finland (FIMM), HiLIFE, University of Helsinki, Helsinki, Finland; Broad Institute, Cambridge, MA, United States	mkurki@broadinstitute.org	FinnGen Analysis working group	FinnGen Analysis working group
Samuli Ripatti	Institute for Molecular Medicine Finland (FIMM), HiLIFE, University of Helsinki, Helsinki, Finland	samuli.ripatti@helsinki.fi	FinnGen Analysis working group	FinnGen Analysis working group
Mark Daly	Institute for Molecular Medicine, Finland (FIMM), HiLIFE, University of Helsinki, Helsinki, Finland; Broad Institute of MIT and Harvard; Massachusetts General Hospital	mark.daly@helsinki.fi	FinnGen Analysis working group	FinnGen Analysis working group
Juha Karjalainen	Institute for Molecular Medicine Finland (FIMM), HiLIFE, University of Helsinki, Helsinki, Finland	juha.karjalainen@helsinki.fi	FinnGen Analysis working group	FinnGen Analysis working group
Aki Havulinna	Institute for Molecular Medicine Finland (FIMM), HiLIFE, University of Helsinki, Helsinki, Finland; Finnish Institute for Health and Welfare (THL), Helsinki, Finland	aki.havulinna@helsinki.fi	FinnGen Analysis working group	FinnGen Analysis working group
Juha Mehtonen	Institute for Molecular Medicine Finland (FIMM), HiLIFE, University of Helsinki, Helsinki, Finland	juha.mehtonen@helsinki.fi	FinnGen Analysis working group	FinnGen Analysis working group
Priit Palta	Institute for Molecular Medicine Finland (FIMM), HiLIFE, University of Helsinki, Helsinki, Finland	priit.palta@helsinki.fi	FinnGen Analysis working group	FinnGen Analysis working group
Shabbeer Hassan	Institute for Molecular Medicine Finland (FIMM), HiLIFE, University of Helsinki, Helsinki, Finland	shabbeer.hassan@helsinki.fi	FinnGen Analysis working group	FinnGen Analysis working group
Pietro Della Briotta Parolo	Institute for Molecular Medicine Finland (FIMM), HiLIFE, University of Helsinki, Helsinki, Finland	pietro.dellabriottaparolo@helsinki.fi	FinnGen Analysis working group	FinnGen Analysis working group
Wei Zhou	Broad Institute, Cambridge, MA, United States	wzhou@broadinstitute.org	FinnGen Analysis working group	FinnGen Analysis working group
Mutaamba Maasha	Broad Institute, Cambridge, MA, United States	mmaasha@broadinstitute.org	FinnGen Analysis working group	FinnGen Analysis working group
Shabbeer Hassan	Institute for Molecular Medicine Finland (FIMM), HiLIFE, University of Helsinki, Helsinki, Finland	shabbeer.hassan@helsinki.fi	FinnGen Analysis working group	FinnGen Analysis working group
Susanna Lemmelä	Institute for Molecular Medicine Finland (FIMM), HiLIFE, University of Helsinki, Helsinki, Finland	susanna.lemmela@helsinki.fi	FinnGen Analysis working group	FinnGen Analysis working group
Manuel Rivas	University of Stanford, Stanford, CA, United States	mrivas@stanford.edu	FinnGen Analysis working group	FinnGen Analysis working group
Aarno Palotie	Institute for Molecular Medicine Finland (FIMM), HiLIFE, University of Helsinki, Helsinki, Finland	aarno.palotie@helsinki.fi	FinnGen Analysis working group	FinnGen Analysis working group
Aoxing Liu	Institute for Molecular Medicine Finland (FIMM), HiLIFE, University of Helsinki, Helsinki, Finland	aoxing.liu@helsinki.fi	FinnGen Analysis working group	FinnGen Analysis working group
Arto Lehisto	Institute for Molecular Medicine Finland (FIMM), HiLIFE, University of Helsinki, Helsinki, Finland	arto.lehisto@helsinki.fi	FinnGen Analysis working group	FinnGen Analysis working group
Andrea Ganna	Institute for Molecular Medicine Finland (FIMM), HiLIFE, University of Helsinki, Helsinki, Finland	aganna@broadinstitute.org	FinnGen Analysis working group	FinnGen Analysis working group
Vincent Llorens	Institute for Molecular Medicine Finland (FIMM), HiLIFE, University of Helsinki, Helsinki, Finland	vincent.llorens@helsinki.fi	FinnGen Analysis working group	FinnGen Analysis working group
Hannele Laivuori	Institute for Molecular Medicine Finland (FIMM), HiLIFE, University of Helsinki, Helsinki, Finland	hannele.laivuori@helsinki.fi	FinnGen Analysis working group	FinnGen Analysis working group
Taru Tukiainen	Institute for Molecular Medicine Finland (FIMM), HiLIFE, University of Helsinki, Helsinki, Finland	taru.tukiainen@helsinki.fi	FinnGen Analysis working group	FinnGen Analysis working group
Mary Pat Reeve	Institute for Molecular Medicine Finland (FIMM), HiLIFE, University of Helsinki, Helsinki, Finland	mary.reeve@helsinki.fi	FinnGen Analysis working group	FinnGen Analysis working group
Henrike Heyne	Institute for Molecular Medicine Finland (FIMM), HiLIFE, University of Helsinki, Helsinki, Finland	hheyne@broadinstitute.org	FinnGen Analysis working group	FinnGen Analysis working group
Nina Mars	Institute for Molecular Medicine Finland (FIMM), HiLIFE, University of Helsinki, Helsinki, Finland	nina.mars@helsinki.fi	FinnGen Analysis working group	FinnGen Analysis working group
Joel Rämö	Institute for Molecular Medicine Finland (FIMM), HiLIFE, University of Helsinki, Helsinki, Finland	joel.ramo@helsinki.fi	FinnGen Analysis working group	FinnGen Analysis working group
Elmo Saarentaus	Institute for Molecular Medicine Finland (FIMM), HiLIFE, University of Helsinki, Helsinki, Finland	elmo.saarentaus@helsinki.fi	FinnGen Analysis working group	FinnGen Analysis working group
Hanna Ollila	Institute for Molecular Medicine Finland (FIMM), HiLIFE, University of Helsinki, Helsinki, Finland	hanna.m.ollila@helsinki.fi	FinnGen Analysis working group	FinnGen Analysis working group
Satu Strausz	Institute for Molecular Medicine Finland (FIMM), HiLIFE, University of Helsinki, Helsinki, Finland	satu.strausz@helsinki.fi	FinnGen Analysis working group	FinnGen Analysis working group
Tuula Palotie	University of Helsinki and Hospital District of Helsinki and Uusimaa, Helsinki, Finland	tuula.palotie@helsinki.fi	FinnGen Analysis working group	FinnGen Analysis working group
Kimmo Palin	University of Helsinki, Helsinki, Finland	kimmo.palin@helsinki.fi	FinnGen Analysis working group	FinnGen Analysis working group
Javier Garcia-Tabuenca	University of Tampere, Tampere, Finland	javier.graciatabuenca@tuni.fi	FinnGen Analysis working group	FinnGen Analysis working group
Harri Siirtola	University of Tampere, Tampere, Finland	harri.siirtola@tuni.fi	FinnGen Analysis working group	FinnGen Analysis working group
Tuomo Kiiskinen	Institute for Molecular Medicine Finland (FIMM), HiLIFE, University of Helsinki, Helsinki, Finland	tuomo.kiiskinen@helsinki.fi	FinnGen Analysis working group	FinnGen Analysis working group
Jiwoo Lee	Institute for Molecular Medicine Finland (FIMM), HiLIFE, University of Helsinki, Helsinki, Finland; Broad Institute, Cambridge, MA, United States	jiwoo.lee@helsinki.fi	FinnGen Analysis working group	FinnGen Analysis working group
Kristin Tsuo	Institute for Molecular Medicine Finland (FIMM), HiLIFE, University of Helsinki, Helsinki, Finland; Broad Institute, Cambridge, MA, United States	kristintsuo@fas.harvard.edu	FinnGen Analysis working group	FinnGen Analysis working group
Amanda Elliott	Institute for Molecular Medicine Finland (FIMM), HiLIFE, University of Helsinki, Helsinki, Finland; Broad Institute, Cambridge, MA, USA and Massachusetts General Hospital, Boston, MA, USA	aelliott@broadinstitute.org	FinnGen Analysis working group	FinnGen Analysis working group
Kati Kristiansson	THL Biobank / Finnish Institute for Health and Welfare (THL), Helsinki, Finland	kati.kristiansson@thl.fi	FinnGen Analysis working group	FinnGen Analysis working group
Mikko Arvas	Finnish Red Cross Blood Service / Finnish Hematology Registry and Clinical Biobank, Helsinki, Finland	mikko.arvas@veripalvelu.fi	FinnGen Analysis working group	FinnGen Analysis working group
Kati Hyvärinen	Finnish Red Cross Blood Service, Helsinki, Finland	kati.hyvarinen@veripalvelu.fi	FinnGen Analysis working group	FinnGen Analysis working group
Jarmo Ritari	Finnish Red Cross Blood Service, Helsinki, Finland	jarmo.ritari@veripalvelu.fi	FinnGen Analysis working group	FinnGen Analysis working group
Olli Carpén	Helsinki Biobank / Helsinki University and Hospital District of Helsinki and Uusimaa, Helsinki	olli.carpen@helsinki.fi	FinnGen Analysis working group	FinnGen Analysis working group
Johannes Kettunen	Northern Finland Biobank Borealis / University of Oulu / Northern Ostrobothnia Hospital District, Oulu, Finland	johannes.kettunen@oulu.fi	FinnGen Analysis working group	FinnGen Analysis working group
Katri Pylkäs	University of Oulu, Oulu, Finland	katri.pylkas@oulu.fi	FinnGen Analysis working group	FinnGen Analysis working group
Eeva Sliz	University of Oulu, Oulu, Finland	eeva.sliz@oulu.fi	FinnGen Analysis working group	FinnGen Analysis working group
Minna Karjalainen	University of Oulu, Oulu, Finland	minna.k.karjalainen@oulu.fi	FinnGen Analysis working group	FinnGen Analysis working group
Tuomo Mantere	Northern Finland Biobank Borealis / University of Oulu / Northern Ostrobothnia Hospital District, Oulu, Finland	tuomo.mantere@oulu.fi	FinnGen Analysis working group	FinnGen Analysis working group
Eeva Kangasniemi	Finnish Clinical Biobank Tampere / University of Tampere / Pirkanmaa Hospital District, Tampere, Finland	eeva.kangasniemi@pshp.fi	FinnGen Analysis working group	FinnGen Analysis working group
Sami Heikkinen	University of Eastern Finland, Kuopio, Finland	sami.heikkinen@uef.fi	FinnGen Analysis working group	FinnGen Analysis working group
Arto Mannermaa	Biobank of Eastern Finland / University of Eastern Finland / Northern Savo Hospital District, Kuopio, Finland	arto.mannermaa@uef.fi	FinnGen Analysis working group	FinnGen Analysis working group
Eija Laakkonen	University of Jyväskylä, Jyväskylä, Finland	eija.k.laakkonen@jyu.fi	FinnGen Analysis working group	FinnGen Analysis working group
Nina Pitkänen	Auria Biobank / University of Turku / Hospital District of Southwest Finland, Turku, Finland	Niina.Pitkanen@tyks.fi	FinnGen Analysis working group	FinnGen Analysis working group
Samuel Lessard	Translational Sciences, Sanofi R&D, Framingham, MA, USA	samuel.lessard@sanofi.com	FinnGen Analysis working group	FinnGen Analysis working group
Clément Chatelain	Translational Sciences, Sanofi R&D, Framingham, MA, USA	clement.chatelain@sanofi.com	FinnGen Analysis working group	FinnGen Analysis working group
Lila Kallio	Auria Biobank / University of Turku / Hospital District of Southwest Finland, Turku, Finland	Lila.Kallio@tyks.fi	Biobank directors	Biobank directors
Tiina Wahlfors	THL Biobank / Finnish Institute for Health and Welfare (THL), Helsinki, Finland	tiina.wahlfors@thl.fi	Biobank directors	Biobank directors
Jukka Partanen	Finnish Red Cross Blood Service / Finnish Hematology Registry and Clinical Biobank, Helsinki, Finland	jukka.partanen@veripalvelu.fi	Biobank directors	Biobank directors
Eero Punkka	Helsinki Biobank / Helsinki University and Hospital District of Helsinki and Uusimaa, Helsinki	eero.punkka@hus.fi	Biobank directors	Biobank directors
Raisa Serpi	Northern Finland Biobank Borealis / University of Oulu / Northern Ostrobothnia Hospital District, Oulu, Finland	raisa.serpi@ppshp.fi	Biobank directors	Biobank directors
Sanna Siltanen	Finnish Clinical Biobank Tampere / University of Tampere / Pirkanmaa Hospital District, Tampere, Finland	sanna.siltanen@pirha.fi	Biobank directors	Biobank directors
Veli-Matti Kosma	Biobank of Eastern Finland / University of Eastern Finland / Northern Savo Hospital District, Kuopio, Finland	veli-matti.kosma@uef.fi	Biobank directors	Biobank directors
Tiina Jokela	Central Finland Biobank / University of Jyväskylä / Central Finland Health Care District, Jyväskylä, Finland	tiina.a.jokela@jyu.fi	Biobank directors	Biobank directors
Anu Jalanko	Institute for Molecular Medicine Finland (FIMM), HiLIFE, University of Helsinki, Helsinki, Finland	anu.jalanko@helsinki.fi	FinnGen Teams	Administration
Auli Toivola	Institute for Molecular Medicine Finland (FIMM), HiLIFE, University of Helsinki, Helsinki, Finland	auli.toivola@helsinki.fi	FinnGen Teams	Administration
Huei-Yi Shen	Institute for Molecular Medicine Finland (FIMM), HiLIFE, University of Helsinki, Helsinki, Finland	huei-yi.shen@helsinki.fi	FinnGen Teams	Administration
Risto Kajanne	Institute for Molecular Medicine Finland (FIMM), HiLIFE, University of Helsinki, Helsinki, Finland	risto.kajanne@helsinki.fi	FinnGen Teams	Administration
Rodos Rodosthenous	Institute for Molecular Medicine Finland (FIMM), HiLIFE, University of Helsinki, Helsinki, Finland	rodos.rodosthenous@helsinki.fi	FinnGen Teams	Administration
Mervi Aavikko	Institute for Molecular Medicine Finland (FIMM), HiLIFE, University of Helsinki, Helsinki, Finland	mervi.aavikko@helsinki.fi	FinnGen Teams	Administration
Helen Cooper	Institute for Molecular Medicine Finland (FIMM), HiLIFE, University of Helsinki, Helsinki, Finland	helen.cooper@helsinki.fi	FinnGen Teams	Administration
Denise Öller	Institute for Molecular Medicine Finland (FIMM), HiLIFE, University of Helsinki, Helsinki, Finland	denise.oller@helsinki.fi	FinnGen Teams	Administration
Tarja Laitinen	Institute for Molecular Medicine Finland (FIMM), HiLIFE, University of Helsinki, Helsinki, Finland	tarja.laitinen@helsinki.fi	FinnGen Teams	Administration
Rasko Leinonen	Institute for Molecular Medicine Finland (FIMM), HiLIFE, University of Helsinki, Helsinki, Finland; European Molecular Biology Laboratory, European Bioinformatics Institute, Cambridge, UK	rasko@ebi.ac.uk	FinnGen Teams	Administration
Henna Palin	Finnish Clinical Biobank Tampere / University of Tampere / Pirkanmaa Hospital District, Tampere, Finland	henna.palin@pshp.fi	FinnGen Teams	Administration
Malla-Maria Linna	Helsinki Biobank / Helsinki University and Hospital District of Helsinki and Uusimaa, Helsinki	malla-maria.linna@hus.fi	FinnGen Teams	Administration
Mitja Kurki	Institute for Molecular Medicine Finland (FIMM), HiLIFE, University of Helsinki, Helsinki, Finland; Broad Institute, Cambridge, MA, United States	mkurki@broadinstitute.org	FinnGen Teams	Analysis
Juha Karjalainen	Institute for Molecular Medicine Finland (FIMM), HiLIFE, University of Helsinki, Helsinki, Finland	juha.karjalainen@helsinki.fi	FinnGen Teams	Analysis
Pietro Della Briotta Parolo	Institute for Molecular Medicine Finland (FIMM), HiLIFE, University of Helsinki, Helsinki, Finland	pietro.dellabriottaparolo@helsinki.fi	FinnGen Teams	Analysis
Arto Lehisto	Institute for Molecular Medicine Finland (FIMM), HiLIFE, University of Helsinki, Helsinki, Finland	arto.lehisto@helsinki.fi	FinnGen Teams	Analysis
Juha Mehtonen	Institute for Molecular Medicine Finland (FIMM), HiLIFE, University of Helsinki, Helsinki, Finland	juha.mehtonen@helsinki.fi	FinnGen Teams	Analysis
Wei Zhou	Broad Institute, Cambridge, MA, United States	wzhou@broadinstitute.org	FinnGen Teams	Analysis
Masahiro Kanai	Broad Institute, Cambridge, MA, United States	mkanai@broadinstitute.org	FinnGen Teams	Analysis
Mutaamba Maasha	Broad Institute, Cambridge, MA, United States	mmaasha@broadinstitute.org	FinnGen Teams	Analysis
Zhili Zheng	Broad Institute, Cambridge, MA, United States	zhengzhi@broadinstitute.org	FinnGen Teams	Analysis
Hannele Laivuori	Institute for Molecular Medicine Finland (FIMM), HiLIFE, University of Helsinki, Helsinki, Finland	hannele.laivuori@helsinki.fi	FinnGen Teams	Clinical Endpoint Development
Aki Havulinna	Institute for Molecular Medicine Finland (FIMM), HiLIFE, University of Helsinki, Helsinki, Finland; Finnish Institute for Health and Welfare (THL), Helsinki, Finland	aki.havulinna@helsinki.fi	FinnGen Teams	Clinical Endpoint Development
Susanna Lemmelä	Institute for Molecular Medicine Finland (FIMM), HiLIFE, University of Helsinki, Helsinki, Finland	susanna.lemmela@helsinki.fi	FinnGen Teams	Clinical Endpoint Development
Tuomo Kiiskinen	Institute for Molecular Medicine Finland (FIMM), HiLIFE, University of Helsinki, Helsinki, Finland	tuomo.kiiskinen@helsinki.fi	FinnGen Teams	Clinical Endpoint Development
L. Elisa Lahtela	Institute for Molecular Medicine Finland (FIMM), HiLIFE, University of Helsinki, Helsinki, Finland	laura.lahtela@helsinki.fi	FinnGen Teams	Clinical Endpoint Development
Mari Kaunisto	Institute for Molecular Medicine Finland (FIMM), HiLIFE, University of Helsinki, Helsinki, Finland	mari.kaunisto@helsinki.fi	FinnGen Teams	Communication
Elina Kilpeläinen	Institute for Molecular Medicine Finland (FIMM), HiLIFE, University of Helsinki, Helsinki, Finland	elina.kilpelainen@helsinki.fi	FinnGen Teams	E-Science
Tianduanyi Wang	Institute for Molecular Medicine Finland (FIMM), HiLIFE, University of Helsinki, Helsinki, Finland	tianduanyi.wang@helsinki.fi	FinnGen Teams	E-Science
Timo P. Sipilä	Institute for Molecular Medicine Finland (FIMM), HiLIFE, University of Helsinki, Helsinki, Finland	timo.p.sipila@helsinki.fi	FinnGen Teams	E-Science
Oluwaseun Alexander Dada	Institute for Molecular Medicine Finland (FIMM), HiLIFE, University of Helsinki, Helsinki, Finland	alexander.dada@helsinki.fi	FinnGen Teams	E-Science
Awaisa Ghazal	Institute for Molecular Medicine Finland (FIMM), HiLIFE, University of Helsinki, Helsinki, Finland	awaisa.ghazal@helsinki.fi	FinnGen Teams	E-Science
Anastasia Kytölä	Institute for Molecular Medicine Finland (FIMM), HiLIFE, University of Helsinki, Helsinki, Finland	anastasia.shcherban@helsinki.fi	FinnGen Teams	E-Science
Rigbe Weldatsadik	Institute for Molecular Medicine Finland (FIMM), HiLIFE, University of Helsinki, Helsinki, Finland	rigbe.weldatsadik@helsinki.fi	FinnGen Teams	E-Science
Sanni Ruotsalainen	Institute for Molecular Medicine Finland (FIMM), HiLIFE, University of Helsinki, Helsinki, Finland	sanni.ruotsalainen@helsinki.fi	FinnGen Teams	E-Science
Jaska Uimonen	Institute for Molecular Medicine Finland (FIMM), HiLIFE, University of Helsinki, Helsinki, Finland	jaska.uimonen@helsinki.fi	FinnGen Teams	E-Science
Kati Donner	Institute for Molecular Medicine Finland (FIMM), HiLIFE, University of Helsinki, Helsinki, Finland	kati.donner@helsinki.fi	FinnGen Teams	Genotyping
Anu Loukola	Helsinki Biobank / Helsinki University and Hospital District of Helsinki and Uusimaa, Helsinki	anu.loukola@hus.fi	FinnGen Teams	Sample Collection Coordination
Päivi Laiho	THL Biobank / Finnish Institute for Health and Welfare (THL), Helsinki, Finland	paivi.laiho@thl.fi	FinnGen Teams	Sample Logistics
Tuuli Sistonen	THL Biobank / Finnish Institute for Health and Welfare (THL), Helsinki, Finland	tuuli.sistonen@thl.fi	FinnGen Teams	Sample Logistics
Essi Kaiharju	THL Biobank / Finnish Institute for Health and Welfare (THL), Helsinki, Finland	essi.kaiharju@thl.fi	FinnGen Teams	Sample Logistics
Markku Laukkanen	THL Biobank / Finnish Institute for Health and Welfare (THL), Helsinki, Finland	markku.laukkanen@thl.fi	FinnGen Teams	Sample Logistics
Elina Järvensivu	THL Biobank / Finnish Institute for Health and Welfare (THL), Helsinki, Finland	elina.jarvensivu@thl.fi	FinnGen Teams	Sample Logistics
Sini Lähteenmäki	THL Biobank / Finnish Institute for Health and Welfare (THL), Helsinki, Finland	sini.lahteenmaki@thl.fi	FinnGen Teams	Sample Logistics
Lotta Männikkö	THL Biobank / Finnish Institute for Health and Welfare (THL), Helsinki, Finland	lotta.mannikko@thl.fi	FinnGen Teams	Sample Logistics
Regis Wong	THL Biobank / Finnish Institute for Health and Welfare (THL), Helsinki, Finland	regis.wong@thl.fi	FinnGen Teams	Sample Logistics
Auli Toivola	THL Biobank / Finnish Institute for Health and Welfare (THL), Helsinki, Finland	auli.toivola@thl.fi	FinnGen Teams	Sample Logistics
Minna Brunfeldt	THL Biobank / Finnish Institute for Health and Welfare (THL), Helsinki, Finland	minna.brunfeldt@thl.fi	FinnGen Teams	Registry Data Operations
Susanna Lemmelä	Institute for Molecular Medicine Finland (FIMM), HiLIFE, University of Helsinki, Helsinki, Finland	susanna.lemmela@helsinki.fi	FinnGen Teams	Registry Data Operations
Sami Koskelainen	THL Biobank / Finnish Institute for Health and Welfare (THL), Helsinki, Finland	sami.koskelainen@thl.fi	FinnGen Teams	Registry Data Operations
Tero Hiekkalinna	THL Biobank / Finnish Institute for Health and Welfare (THL), Helsinki, Finland	tero.hiekkalinna@helsinki.fi	FinnGen Teams	Registry Data Operations
Teemu Paajanen	THL Biobank / Finnish Institute for Health and Welfare (THL), Helsinki, Finland	teemu.paajanen@thl.fi	FinnGen Teams	Registry Data Operations
Priit Palta	Institute for Molecular Medicine Finland (FIMM), HiLIFE, University of Helsinki, Helsinki, Finland	priit.palta@helsinki.fi	FinnGen Teams	Sequencing Informatics
Shuang Luo	Institute for Molecular Medicine Finland (FIMM), HiLIFE, University of Helsinki, Helsinki, Finland	shuang.luo@helsinki.fi	FinnGen Teams	Sequencing Informatics
Mary Pat Reeve	Institute for Molecular Medicine Finland (FIMM), HiLIFE, University of Helsinki, Helsinki, Finland	mary.reeve@helsinki.fi	FinnGen Teams	Trajectory
Shanmukha Sampath Padmanabhuni	Institute for Molecular Medicine Finland (FIMM), HiLIFE, University of Helsinki, Helsinki, Finland	sam.padmanabhuni@helsinki.fi	FinnGen Teams	Trajectory
Marianna Niemi	University of Tampere, Tampere, Finland	marianna.niemi@tuni.fi	FinnGen Teams	Trajectory
Harri Siirtola	University of Tampere, Tampere, Finland	harri.siirtola@tuni.fi	FinnGen Teams	Trajectory
Javier Gracia-Tabuenca	University of Tampere, Tampere, Finland	javier.graciatabuenca@tuni.fi	FinnGen Teams	Trajectory
Mika Helminen	University of Tampere, Tampere, Finland	mika.helminen@tuni.fi	FinnGen Teams	Trajectory
Tiina Luukkaala	University of Tampere, Tampere, Finland	tiina.luukkaala@tuni.fi	FinnGen Teams	Trajectory
Iida Vähätalo	University of Tampere, Tampere, Finland	iida.vahatalo@epshp.fi	FinnGen Teams	Trajectory
Iina Laak	Institute for Molecular Medicine Finland (FIMM), HiLIFE, University of Helsinki, Helsinki, Finland	iina.laak@helsinki.fi	FinnGen Teams	Data protection officer
Marco Hautalahti	Finnish Biobank Cooperative - FINBB	marco.hautalahti@finbb.fi	FinnGen Teams	FINBB - Finnish biobank cooperative
Johanna Mäkelä	Finnish Biobank Cooperative - FINBB	johanna.makela@finbb.fi	FinnGen Teams	FINBB - Finnish biobank cooperative
Saija Haapa-Paananen	Finnish Biobank Cooperative - FINBB	saija.haapa-paananen@finbb.fi	FinnGen Teams	FINBB - Finnish biobank cooperative
Sarah Smith	Finnish Biobank Cooperative - FINBB	sarah.smith@finbb.fi	FinnGen Teams	FINBB - Finnish biobank cooperative
Tom Southerington	Finnish Biobank Cooperative - FINBB	tom.southerington@finbb.fi	FinnGen Teams	FINBB - Finnish biobank cooperative
Meri Lähteenmäki	Finnish Biobank Cooperative - FINBB	meri.lahteenmaki@finbb.fi	FinnGen Teams	FINBB - Finnish biobank cooperative
